# Supplementary material for: Deciphering the Transcriptional-Regulatory Network of Flocculation in Schizosaccharomyces pombe
Source: PLoS Genet. 2012 Dec 6;8(12):e1003104. doi: 10.1371/journal.pgen.1003104 (PMC3516552; doi:10.1371/journal.pgen.1003104)
Supplement: Table S4 — Expression Microarray Profiling of rfl1 deletion strain versus isogenic wild type. (XLSX) [file pgen.1003104.s005.xlsx]

## Sheet: Sheet1
Table S4 Expression Microarray Profiling of rfl1 deletion strain vs. isogenic wild type
Systematic Name	Gene Name	Description	rfl1 Del log2 Fold Change	rfl1 Del p-value
SPAC186.01	pfl9	glycoprotein	6.34542	2.14e-117
SPCC1742.01	gsf2	glycoprotein	5.93976	2.57e-103
SPBC354.12	gpd3	glycolysis: glyceraldehyde 3-phosphate dehydrogenase Gpd3	4.72621	1.87e-66
SPBPB2B2.06c	0	calcineurin-like phosphoesterase	4.701	8.99e-66
SPBPB2B2.01	0	amino acid permease family	4.66825	6.81e-65
SPAC1F8.06	fta5	Sim4 and Mal2 associated	4.03896	3.85e-49
SPCC188.09c	pfl4	glycoprotein	3.93381	1.01e-46
SPBC29B5.02c	isp4	OPT oligopeptide transporter family	3.48132	5.09e-37
SPCC757.07c	ctt1	oxidative stress response: catalase	3.47625	6.44e-37
SPAC869.01	0	amidase	3.46841	9.27e-37
SPAC5D6.10c	mug116	sequence orphan	3.45433	1.78e-36
SPBPB2B2.05	0	GMP synthase [glutamine-hydrolyzing]	3.39483	2.7e-35
SPBC1289.14	0	adducin (predicted); SPBC8E4.10c	3.38434	4.34e-35
SPCC794.04c	0	MFS family membrane transporter	3.37204	7.56e-35
SPAC27D7.09c	0	conserved hypothetical: But2 family proteinÊÊ Ê	3.04498	9.47e-29
SPBPB2B2.15	0	conserved fungal proteinÊÊ Ê	2.93742	7.08e-27
SPAC977.07c	pfl6	glycoprotein	2.92896	9.88e-27
SPAPB1A11.03	0	oxidative stress response: FMN dependent dehydrogenase	2.86588	1.15e-25
SPBC1348.08c	pfl6	glycoprotein	2.8452	2.54e-25
SPAPB24D3.07c	0	sequence orphan: ERÊÊ Ê	2.83388	3.91e-25
SPAC1751.01c	gti1	gluconate transporter inducer Gti1	2.82628	5.22e-25
SPBC1348.06c	0	conserved fungal proteinÊ Ê	2.81563	7.81e-25
SPBC19C7.04c	0	conserved fungal protein	2.7748	3.62e-24
SPAC27D7.11c	0	conserved hypothetical: But2 family proteinÊÊ Ê	2.76568	5.09e-24
SPAC30D11.02c	0	sequence orphanÊÊ Ê	2.74814	9.74e-24
SPBP4G3.02	pho1	acid phosphatase	2.74176	1.23e-23
SPAC27D7.10c	0	conserved hypothetical: But2 family proteinÊÊ Ê	2.7339	1.65e-23
SPAC23H3.15c	0	oxidative stress response: sequence orphanÊÊ Ê	2.65406	2.97e-22
SPAC977.05c	0	conserved fungal proteinÊÊ Ê	2.61328	1.26e-21
SPAC1002.19	urg1	GTP cyclohydrolase	2.57679	4.52e-21
SPBC947.04	pfl3	glycoprotein	2.52109	3.06e-20
SPAPB1A11.02	0	esterase/lipase	2.43786	4.96e-19
SPAC186.02c	0	2-hydroxyacid dehydrogenase	2.4194	9.08e-19
SPBC1289.15	pfl5	glycoprotein	2.27707	8.32e-17
SPAC5D6.09c	0	GPR/FUN34 family	2.26781	1.11e-16
SPBC1685.13	0	non classical export pathway protein	2.11013	1.19e-14
SPCC61.05	0	S. pombe specific multicopy membrane protein family 1	2.08686	2.3e-14
SPAC5H10.11	gmh1	alpha-1,2-galactosyltransferase Gmh1	2.06735	3.99e-14
SPBP4G3.03	0	conserved hypothetical: PI31 proteasome regulator relatedÊÊ Ê	1.9786	4.58e-13
SPAC1B2.03c	0	fatty acid biosynthesis: GNS1/SUR4 family protein	1.95415	8.81e-13
SPCC320.03	0	transcription factor	1.92442	1.93e-12
SPAC977.02	0	telomeric duplication	1.9225	2.03e-12
SPBPB2B2.17c	0	dubious ORF (B44484)	1.91584	2.42e-12
SPBC317.01	mbx2	MADS-box transcription factor Pvg4	1.89707	3.94e-12
SPCC1393.12	0	sequence orphan	1.89377	4.29e-12
SPAC750.04c	0	dubious ORF (B44484)	1.89273	4.4e-12
SPBC725.10	0	similar to peripheral-type benzodiazepine receptor	1.89236	4.44e-12
SPAPB15E9.02c	0	dubious ORF (sequence orphan)	1.87333	7.24e-12
SPAP8A3.04c	hsp9	heat shock protein	1.86332	9.35e-12
SPBC1683.01	0	inorganic phosphate transporter	1.85351	1.2e-11
SPAC806.11	0	dubious ORF	1.81373	3.24e-11
SPAC4G8.03c	0	RNA-binding PUMILIO protein: deadenylation-dependent decay	1.79897	4.67e-11
SPAC1002.01	0	conserved fungal protein	1.79614	5.01e-11
SPAC2H10.01	0	transcription factor	1.78967	5.87e-11
SPAC17A2.10c	0	sequence orphan	1.78109	7.23e-11
SPBC16E9.16c	lsd90	fatty acid biosynthesis: Lsd90 protein: possible role in fatty acid synthesisÊ Ê	1.78004	7.42e-11
SPAC17A2.09c	csx1	RNA-binding protein Csx1: regulation of mRNA stability involved in response to stress	1.71321	3.66e-10
Random Sequence	#N/A	#N/A	1.68476	7.1e-10
SPBC119.04	mei3	meiosis inducing protein Mei3	1.68307	7.38e-10
SPCC622.08c	hta1	histone H2A	1.66094	1.23e-09
SPBC660.05	0	conserved fungal proteinÊÊ Ê	1.65236	1.49e-09
SPAP7G5.06	0	amino acid permease family	1.64794	1.65e-09
SPCPB1C11.01	amt1	ammonium transporter	1.63255	2.33e-09
SPBC3H7.05c	0	sequence orphan	1.61998	3.08e-09
SPCC736.04c	gma12	alpha-1,2-galactosyltransferase Gma12	1.55822	1.19e-08
SPBC56F2.05c	0	transcription factor	1.53882	1.8e-08
SPCC320.05	0	sulfate transporter	1.52718	2.3e-08
SPCC794.12c	mae2	aerobic respiration: malic enzyme	1.52175	2.58e-08
SPAC1002.17c	0	uracil phosphoribosyltransferase	1.49446	4.54e-08
SPBC1348.03	0	dubious ORF (B44484)	1.49275	4.71e-08
SPBC26H8.11c	0	conserved fungal proteinÊÊ Ê	1.4708	7.37e-08
SPAPB1E7.08c	0	membrane transporter	1.46439	8.4e-08
SPAC1039.10	mmf2	homologous Pmf1p factor 1	1.43113	1.63e-07
SPBPB2B2.08	0	conserved fungal proteinÊÊ Ê	1.42752	1.75e-07
SPAC1039.02	0	calcineurin-like phosphoesterase	1.4096	2.5e-07
SPBC354.13	rga6	GTPase activating protein Rga6	1.40881	2.53e-07
SPAC3C7.05c	0	glycosyl hydrolase family 76	1.40121	2.94e-07
SPAC4D7.02c	0	glycerophosphoryl diester phosphodiesterase	1.4009	2.96e-07
SPBC365.12c	ish1	LEA domain protein	1.39846	3.1e-07
SPAC1687.16c	0	ergosterol biosynthesis: lathosterol oxidase	1.39681	3.2e-07
SPAC869.10c	0	proline specific permease	1.38369	4.12e-07
SPBC25B2.08	0	sequence orphan	1.36676	5.69e-07
SPBC21C3.19	0	conserved hypothetical: DUF1960 family protein	1.36583	5.79e-07
SPBC36.03c	0	spermidine family transporter	1.33882	9.62e-07
SPAC17C9.16c	0	spermine transporter family	1.33796	9.78e-07
SPCC553.10	0	glycoprotein	1.33085	1.12e-06
SPCC18.17c	0	sequence orphan	1.32895	1.16e-06
SPCC11E10.01	0	cystathionine beta-lyase	1.32447	1.25e-06
SPAC1D4.13	byr1	conjugation: MAP kinase kinase Byr1	1.31866	1.4e-06
SPBP35G2.02	0	conserved hypothetical: DUF1000 family proteinÊÊ Ê	1.31436	1.51e-06
SPAC15E1.02c	0	conserved hypothetical: DUF1761 family protein	1.30897	1.67e-06
SPAC4G9.07	mug133	S. pombe specific UPF0300 family protein 2	1.29623	2.1e-06
SPCC330.11	btb1	BTB/POZ domain	1.28003	2.81e-06
SPCC1753.02c	git3	G-protein coupled receptor Git3	1.27895	2.86e-06
SPCC61.01c	str2	iron ion homeostasis: siderophore-iron transporter Str2	1.2759	3.02e-06
SPBC3H7.02	0	sulfate transporter	1.27576	3.03e-06
SPAC343.12	rds1	conserved fungal protein	1.26378	3.75e-06
SPBC1271.09	0	glycerophosphodiester transporter	1.26087	3.95e-06
SPCC18B5.05c	0	vitamin metabolism: pyrimidine kinase	1.25857	4.11e-06
SPBC354.11c	0	dubious ORF (sequence orphan)	1.25623	4.28e-06
SPAC3H5.09c	0	conserved hypothetical: conserved eukaryotic mitochondrial protein (predicted)	1.23795	5.89e-06
SPAPB24D3.10c	agl1	alpha-glucosidase Agl1	1.23575	6.12e-06
SPCC1281.06c	0	fatty acid biosynthesis: acyl-coA desaturase	1.23288	6.43e-06
SPBP26C9.03c	0	iron ion transporter	1.21137	9.29e-06
SPAC57A10.02	cdr2	GIN4 family protein kinase Cdr2	1.20393	1.05e-05
SPAC25H1.02	jmj1	jmjC domain	1.20083	1.11e-05
SPCC285.05	0	purine nucleoside transporter	1.19613	1.2e-05
SPAC17A5.02c	dbr1	mRNA splicing: RNA lariat debranching enzyme	1.19508	1.22e-05
SPCC1223.12c	meu10	fungal cell wall: GPI anchored cell surface protein (predicted)ÊÊ Ê	1.18985	1.33e-05
SPAC16A10.01	0	conserved hypothetical: DUF1212 family protein	1.17213	1.79e-05
SPBPB2B2.07c	0	DUF999	1.1715	1.81e-05
SPBC1604.01	0	sulfatase modifying factor 1 related	1.171	1.82e-05
SPAC3C7.06c	pit1	serine/threonine protein kinase Pit1	1.15441	2.39e-05
SPAPB8E5.03	mae1	malic acid transport protein Mae1	1.15408	2.4e-05
SPBC106.09	cut4	anaphase-promoting complex subunit Apc1	1.14813	2.65e-05
SPBC2D10.04	0	arrestin family	1.13372	3.34e-05
SPBC839.16	0	folic acid biosynthesis: C-1-tetrahydrofolate synthase	1.13324	3.36e-05
SPAC30D11.01c	0	alpha-glucosidase	1.13229	3.41e-05
SPCC1223.09	0	uricase	1.13187	3.44e-05
SPAC3H1.11	hdr1	oxidative stress response: transcription factor	1.13059	3.51e-05
SPAC22F3.12c	rgs1	conjugation: regulator of G-protein signaling Rgs1	1.12966	3.56e-05
SPAPB2B4.03	cig2	G1/S transition: cyclin	1.12843	3.63e-05
SPBC8E4.01c	0	inorganic phosphate transporter	1.11783	4.29e-05
SPCC576.04	0	bax inhibitor-like protein	1.11109	4.77e-05
SPAC1565.01	0	conserved fungal proteinÊÊ Ê	1.10856	4.97e-05
SPCC594.02c	0	conserved fungal proteinÊÊ Ê	1.10163	5.54e-05
SPAC521.04c	0	calcium permease	1.10044	5.64e-05
SPBC83.11	0	phosphate/phosphoenolpyruvate translocator	1.09135	6.49e-05
SPBC3E7.02c	hsp16	heat shock protein	1.09108	6.52e-05
SPAC637.03	0	conserved fungal protein	1.08822	6.81e-05
SPBC3D6.02	but2	neddylation pathway protein But2	1.08756	6.88e-05
SPCP31B10.06	0	C2 domain	1.08681	6.96e-05
SPAC11E3.13c	gas5	fungal cell wall: 1,3-beta-glucanosyltransferase (predicted)	1.0819	7.51e-05
SPCC1235.14	ght5	hexose transporter	1.08068	7.65e-05
SPBC1D7.03	0	cyclin	1.07958	7.78e-05
SPBC31F10.10c	0	zinc finger protein	1.06842	9.22e-05
SPAC1039.03	0	esterase/lipase	1.06721	9.39e-05
SPBC83.13	0	mitochondrial tricarboxylic acid transporter	1.06267	0.000100552
SPAC24H6.04	hxk1	glycolysis/pentose phoshate shunt: hexokinase 1	1.05424	0.00011412
SPAC13G6.03	gpi7	phospholipid biosynthesis: GPI anchor biosynthesis protein Gpi7	1.04448	0.000131976
SPCC1393.13	0	conserved hypothetical: DUF89 family proteinÊÊ Ê	1.04235	0.000136213
SPAC16.05c	sfp1	transcription factor	1.03937	0.000142353
SPCC16C4.02c	0	conserved hypothetical: DUF1941 family proteinÊÊ Ê	1.03905	0.000143035
SPAC110.01	ppk1	serine/threonine protein kinase	1.03165	0.000159494
SPAC212.09c	0	pseudogene	1.02954	0.000164515
SPBCPT2R1.10	0	pseudogene	1.02629	0.000172537
SPBC428.10	0	sequence orphan (mitochondrion)	1.0258	0.000173768
SPBC24C6.09c	0	phosphoketolase	1.02236	0.000182696
SPBPB2B2.10c	0	galactose-1-phosphate uridylyltransferase	1.02146	0.000185111
SPBC713.12	erg1	ergosterol biosynthesis: squalene monooxygenase Erg1	1.0182	0.000194094
SPBC1105.14	0	zinc finger protein	1.01627	0.000199593
SPAC21E11.03c	pcr1	bZIP	1.00285	0.000242129
SPAC17A5.11	rec12	endonuclease Rec12	1.00179	0.00024586
SPBC3H7.08c	0	conserved fungal protein	0.99878	0.000256641
SPAC1002.18	urg3	conserved hypothetical (DUF1688 family protein)	0.996366	0.000265623
SPCC965.13	0	MFS family membrane transporter	0.994687	0.000272039
SPCC1223.13	cbf12	regulator of cell separation/cytokinesis: CBF1/Su(H)/LAG-1 family transcription factor Cbf12	0.994346	0.000273362
SPCC622.12c	0	NADP-specific glutamate dehydrogenase	0.991927	0.00028291
SPBC9B6.03	0	zinc finger protein	0.988894	0.000295319
SPBC215.13	0	glycoprotein	0.988771	0.000295835
SPAC5D6.08c	mes1	meiosis II protein Mes1	0.988056	0.000298839
SPAC3C7.14c	obr1	ubiquitinated histone-like protein Uhp1	0.987312	0.000301995
SPAC26F1.10c	pyp1	tyrosine phosphatase Pyp1	0.985717	0.000308865
SPAC1039.01	0	amino acid permease family	0.984943	0.000312252
SPAC2G11.13	atg22	autophagy associated protein	0.983783	0.000317396
SPAC1834.05	alg9	phospholipid biosynthesis: mannosyltransferase complex subunit Alg10	0.97059	0.000381727
SPAC167.06c	mug143	sequence orphan	0.97023	0.000383642
SPCC330.08	alg11	mannosyltransferase complex subunit Alg11	0.969625	0.000386879
SPBC1709.01	chs2	chitin synthase II	0.96946	0.000387768
SPBC3H7.09	mug142	meiotically upregulated gene Mug142	0.969164	0.000389365
SPBC725.03	0	conserved yeast protein	0.967674	0.000397503
SPCC757.06	0	dubious ORF (sequence orphan)	0.964666	0.00041441
SPCC1223.03c	gut2	glycerol-3-phosphate dehydrogenase Gut2	0.963714	0.000419903
SPCC1450.16c	0	triacylglycerol lipase	0.95443	0.000477124
SPAC13F5.03c	gld1	glycerol dehydrogenase	0.950764	0.000501659
SPBC32H8.07	git5	heterotrimeric G protein beta subunit Git5	0.949755	0.000508616
SPCC736.15	0	protein kinase inhibitor	0.945833	0.000536516
SPCC63.04	mok14	alpha-1,3-glucan synthase	0.945581	0.000538361
SPBCPT2R1.07c	0	pseudo malic enzyme	0.944444	0.000546742
SPCC16C4.21	0	dubious ORF	0.94315	0.00055642
SPAC869.08	pcm2	protein-L-isoaspartate O-methyltransferase	0.938705	0.000590915
SPAC27F1.08	pdt1	Nramp family	0.938194	0.000595008
SPCC895.08c	0	conserved fungal proteinÊÊ Ê	0.937304	0.000602192
SPBC1271.05c	0	zinc finger protein	0.936336	0.000610104
SPBC2G5.02c	0	CK2 family	0.935307	0.000618615
SPCC191.01	0	sequence orphan	0.934204	0.000627866
SPBC3H7.03c	0	glycolysis/aerobic respiration: 2-oxoglutarate dehydrogenase	0.933453	0.00063424
SPBC12C2.04	0	dehydrogenase	0.928082	0.000681585
SPBC16G5.08	trp4	phosphoribosylanthranilate transferase Trp4	0.927238	0.000689312
SPBC29A10.08	gas2	fungal cell wall: 1,3-beta-glucanosyltransferase Gas2 (predicted)	0.926716	0.000694133
SPBC12C2.13c	fnx1	MFS multidrug efflux transporter	0.924575	0.000714243
SPCC162.09c	hmg1	ergosterol biosynthesis: 3-hydroxy-3-methylglutaryl-CoA reductase	0.922981	0.000729573
SPCC132.04c	0	NAD dependent glutamate dehydrogenase	0.921229	0.000746764
SPAC17D4.01	pex7	peroxin-7	0.918809	0.000771133
SPAC22E12.03c	0	conserved hypothetical: THIJ/PFPI family peptidase (predicted)	0.918603	0.00077324
SPACUNK4.17	0	dehydrogenase	0.918163	0.000777755
SPCPB1C11.03	0	membrane transporter	0.916554	0.000794501
SPAC29A4.17c	0	mitochondrial FUN14 family proteinÊÊ Ê	0.916148	0.000798777
SPAC977.08	0	short chain dehydrogenase	0.915875	0.000801662
SPAC869.03c	0	urea transporter	0.915871	0.000801706
SPCC737.03c	ima1	integral inner nuclear membrane protein	0.915848	0.000801945
SPBC609.01	0	ribonuclease II	0.915529	0.00080534
SPAC3G9.13c	msw1	tryptophan-tRNA ligase	0.91536	0.000807142
SPCC162.10	ppk33	serine/threonine protein kinase	0.914538	0.000815948
SPCC970.04c	mob2	cell polarity: protein kinase activator Mob2	0.914427	0.000817148
SPCC320.09	hem15	ferrochelatase	0.912698	0.000835994
SPCC1682.15	mug122	PXA domain: nexin protein	0.911746	0.00084654
SPCC297.03	ssp1	cell polarity: serine/threonine protein kinase Ssp1	0.908467	0.000883817
SPCC622.05	0	dubious ORF	0.908299	0.000885775
SPAC22E12.01	0	triose phosphate transporter	0.906312	0.000909151
SPAC56F8.16	esc1	transcription factor Esc1	0.901614	0.000966712
SPAC23H3.13c	gpa2	heterotrimeric G protein alpha-2 subunit Gpa2	0.900495	0.000980905
SPBC530.15c	0	spermidine family transporter	0.896507	0.0010331
SPAPB2B4.04c	pmc1	calcium signaling/homeostasis: P-type calcium ATPase	0.89524	0.00105021
SPAC19G12.08	0	fatty acid biosynthesis: sphingosine hydroxylase (predicted)	0.889961	0.00112436
SPAPB1E7.09	ogm2	protein O-mannosyltransferase Ogm2	0.88928	0.00113427
SPBC1348.09	0	short chain dehydrogenase	0.887638	0.00115851
SPBC14F5.04c	pgk1	glycolysis: phosphoglycerate kinase	0.884922	0.00119964
SPCC1183.11	0	MS ion channel	0.883858	0.00121612
SPAC22G7.11c	0	conserved fungal protein: similar to N. crassa conidiation-specific protein 6ÊÊ Ê	0.882244	0.00124151
SPAC1002.02	0	nucleoporin	0.880795	0.00126472
SPAC1B3.16c	vht1	vitamin H transporter Vth1	0.88029	0.00127292
SPAC14C4.10c	0	Nudix family hydrolase	0.87887	0.0012962
SPBC26H8.02c	sec9	SNARE	0.873159	0.00139383
SPBC947.10	0	zinc finger protein	0.87296	0.00139734
SPAC1002.13c	psu1	fungal cell wall: beta-glucosidase Psu1	0.872088	0.00141289
SPAC6G10.03c	0	abhydrolase family	0.865898	0.00152776
SPBC32H8.02c	nep2	nedd8 protease Nep2	0.864781	0.00154939
SPAC13G7.13c	msa1	RNA-binding protein: negative regulation of conjugation with cellular fusion	0.863983	0.001565
SPBC776.06c	0	cell polarity/actin cortical patch: spindle pole body interacting protein	0.863826	0.0015681
SPAC30D11.11	0	zinc ion homeostasis: membrane protein involved in zinc metabolism	0.861079	0.00162309
SPMIT.11	cox2	aerobic respiration: cytochrome c oxidase 2	0.860456	0.0016358
SPBC106.11c	plg7	oxidative stress response: 1-alkyl-2-acetylglycerophosphocholine esterase	0.853532	0.00178343
SPBC83.16c	0	conserved protein	0.851882	0.00182038
SPCC1235.01	0	sequence orphan	0.850701	0.00184725
SPAPB24D3.09c	0	ABC transporter family	0.850399	0.00185419
SPAC688.04c	gst3	oxidative stress response: glutathione S-transferase	0.849562	0.00187351
SPCC4F11.02	ptc1	protein phosphatase 2C Ptc1	0.848821	0.00189078
SPAC18G6.12c	0	hypothetical protein: S. pombe specific families	0.848021	0.00190959
SPAC637.13c	0	cytoskeletal signaling protein	0.847508	0.00192175
SPCC191.11	inv1	beta-fructofuranosidase	0.846159	0.00195404
SPBC215.11c	0	aldo/keto reductase	0.845767	0.00196352
SPAC19A8.03	0	myotubularin-related protein	0.844975	0.00198279
SPBC25B2.03	0	glutaredoxin	0.844482	0.00199486
SPAC750.08c	0	NAD-dependent malic enzyme	0.843977	0.00200731
SPCC1393.10	ctr4	copper transporter complex subunit Ctr4	0.842674	0.00203977
SPCC970.08	0	inositol polyphosphate kinase	0.842217	0.00205128
SPAC1006.01	psp3	serine protease	0.842011	0.00205648
SPAC630.08c	erg25	ergosterol biosynthesis: C-4 methylsterol oxidase	0.840789	0.00208758
SPCC1020.05	0	calcineurin-like phosphoesterase	0.835837	0.00221809
SPAC806.06c	0	vitamin metabolism: nicotinamide mononucleotide	0.834617	0.00225137
SPAC5D6.04	0	auxin family	0.832794	0.00230195
SPBC691.05c	pi030	ion channel	0.828362	0.00242932
SPAC328.05	0	RNA-binding protein: poly(A)+ mRNA export from nucleus	0.828334	0.00243015
SPAPB1A11.04c	0	transcription factor	0.825343	0.00251972
SPCC1672.06c	asp1	acid phosphatase Asp1	0.823877	0.00256473
SPCC1739.12	ppe1	serine/threonine protein phosphatase Ppe1	0.823176	0.0025865
SPBC1773.11c	mug89	CDC50 domain protein	0.821896	0.00262671
SPAC56F8.06c	alg10	dolichyl-phosphate-glucose-glycolipid alpha-glucosyltransferase Alg10	0.820703	0.00266471
SPBC4B4.08	ght2	hexose transporter	0.81983	0.00269282
SPAC13G6.10c	0	serine-rich protein	0.815515	0.00283578
SPAC56E4.06c	ggt2	oxidative stress response: gamma-glutamyltranspeptidase Ggt2	0.813221	0.0029146
SPAC24B11.05	0	pyrimidine 5'-nucleotidase	0.813219	0.00291465
SPBC17D11.01	nep1	mitotic spindle checkpoint: nedd8 protease Nep1	0.813151	0.00291702
SPCC1322.14c	vtc4	polyphosphate synthetase	0.810483	0.00301124
SPAC4F8.15	itr1	myo-inositol transporter Itr1	0.809566	0.0030443
SPAC664.09	ggt1	redox homeostasis: gamma-glutamyltranspeptidase Ggt1	0.809172	0.00305856
SPCC1322.03	0	membrane transporter	0.807143	0.00313314
SPAC3A11.10c	0	membrane dipeptidase	0.806884	0.00314277
SPAC1D4.08	0	phospholipid biosynthesis: CDP-diacylglycerol--inositol 3-phosphatidyltransferase	0.806479	0.00315791
SPAC869.07c	mel1	alpha-galactosidase	0.804546	0.00323101
SPBC1683.06c	0	uridine ribohydrolase	0.802212	0.00332133
SPAC17G6.02c	0	oxidative stress response: RTA1-like protein	0.801902	0.00333349
SPBC725.11c	php2	CCAAT-box binding factor complex subunit Php2	0.801241	0.00335954
SPAC6C3.04	cit1	aerobic respiration: citrate synthase	0.800268	0.0033983
SPAC12B10.14c	ppk2	serine/threonine protein kinase	0.80018	0.00340179
SPBC18H10.16	0	amino acid permease family	0.798863	0.00345493
SPBC3B8.10c	0	NLI interacting factor family	0.797243	0.00352128
SPAC821.13c	0	P-type ATPase	0.796688	0.00354428
SPBC215.05	gpd1	glycerol-3-phosphate dehydrogenase Gpd1	0.796256	0.00356229
SPCC320.04c	0	GTPase	0.794642	0.00363028
SPBC119.05c	0	src	0.794237	0.00364753
SPAC31G5.07	0	conjugation protein (predicted)Ê	0.793598	0.00367488
SPBC21H7.06c	0	inositol metabolism protein Opi10	0.793559	0.00367657
SPBC342.01c	alg6	glucosyltransferase Alg6	0.792389	0.00372715
SPCC188.10c	0	pseudogene	0.790227	0.00382232
SPAC4H3.03c	0	glucan 1,4-alpha-glucosidase	0.788516	0.00389922
SPBP8B7.05c	0	carbonic anhydrase	0.788207	0.00391326
SPAC1639.01c	0	fatty acid biosynthesis: GNS1/SUR4 family protein	0.788009	0.00392226
SPAC4F8.07c	hxk2	glycolysis: hexokinase 2	0.786895	0.00397333
SPAC12G12.03	cip2	oxidative stress response: RNA-binding protein Cip2: regulation of mRNA stability involved in response to stress	0.786163	0.00400724
SPAC8C9.03	cgs1	cAMP-dependent protein kinase regulatory subunit Cgs1	0.782233	0.00419372
SPCC1393.08	0	zinc finger protein	0.780518	0.00427753
SPBC2D10.05	exg3	glucan 1,3-beta-glucosidase	0.775346	0.00453959
SPCC1682.11c	0	conserved hypothetical: DUF580 family protein	0.773998	0.00461024
SPCC16C4.07	scw1	RNA-binding protein Scw1: cell wall/septum	0.773151	0.00465515
SPAC1002.03c	gls2	glucosidase II Gls2	0.77271	0.0046787
SPCC2H8.02	0	inorganic phosphate transporter	0.772055	0.00471382
SPAC31A2.12	0	arrestin family	0.771892	0.00472264
SPAC30.04c	0	ABC transporter family	0.771165	0.004762
SPCC1672.03c	0	guanine deaminase	0.768605	0.00490293
SPAC5H10.06c	adh4	alcohol dehydrogenase	0.767768	0.00494986
SPAC3C7.13c	0	pentose phoshate shunt: glucose-6-phosphate 1-dehydrogenase	0.766734	0.00500837
SPCC285.11	ucp10	UBA domain protein	0.765617	0.00507229
SPCP1E11.05c	0	sterol O-acyltransferase	0.763661	0.00518599
SPBC8E4.04	0	aldo/keto reductase	0.76345	0.0051984
SPAC2G11.09	0	DUF221	0.760526	0.00537298
SPAC19G12.16c	adg2	glycoprotein	0.760388	0.00538138
SPAC19A8.04	erg5	ergosterol biosynthesis: C-22 sterol desaturase	0.755915	0.00565917
SPAC18G6.09c	0	oxidative stress response: sequence orphan	0.754483	0.00575078
SPBC1289.16c	0	copper amine oxidase	0.754422	0.00575474
SPAC24H6.13	0	DUF221	0.75384	0.00579239
SPAPB2C8.01	0	glycoprotein	0.753454	0.00581743
SPBC31A8.01c	cwl1	reticulon-like protein	0.7526	0.00587328
SPCC417.05c	chr2	chitin synthase regulatory factor	0.752322	0.00589157
SPCC320.08	0	membrane transporter (predicted)ÊÊ	0.751058	0.00597538
SPAC323.07c	0	MatE family transporter	0.750957	0.00598213
SPBC16H5.02	pfk1	glycolysis: 6-phosphofructokinase	0.750089	0.00604035
SPCC1672.02c	sap1	DNA replication: switch-activating protein Sap1	0.749487	0.00608106
SPBC32H8.03	bem46	esterase/lipase	0.749126	0.00610552
SPAC1002.11	gaa1	phospholipid biosynthesis: GPI-anchor transamidase complex subunit Gaa1	0.748767	0.00613002
SPCC63.14	0	conserved fungal proteinÊÊ Ê	0.746374	0.00629531
SPBC25B2.02c	mam1	conjugation: M-factor transporter Mam1ÊÊ Ê	0.745551	0.00635311
SPBP23A10.14c	ell1	RNA polymerase II transcription elongation factor	0.744873	0.00640111
SPAC6G10.09	0	glucosidase I Gls1	0.744113	0.00645527
SPBC16E9.13	ksp1	serine/threonine protein kinase Ksp1	0.741763	0.00662532
SPAC1F7.03	pkd2	calcium signaling/homeostasis: TRP-like ion channel	0.741406	0.00665147
SPAC3A11.09	0	sodium/hydrogen exchanger family	0.740921	0.00668721
SPCC1795.02c	vcx1	calcium signaling/homeostasis: CaCA proton/calcium exchanger	0.740164	0.00674332
SPBC29A3.08	pof4	elongin A	0.740115	0.00674695
SPBC18H10.20c	0	endocytosis regulator (predicted)	0.737752	0.00692485
SPCC1795.03	gms1	UDP-galactose transporter Gms1	0.737113	0.00697371
SPCC18.04	pof6	F-box protein	0.735624	0.00708873
SPBC27B12.11c	0	transcription factor	0.734445	0.00718092
SPCC4E9.02	cig1	cyclin	0.733297	0.0072718
SPAC11E3.14	0	conserved hypothetical: breast cancer protein domain	0.732929	0.0073012
SPAC328.03	tps1	alpha,alpha-trehalose-phosphate synthase [UDP-forming]	0.732919	0.00730196
SPBC4C3.03	0	homoserine kinase	0.727802	0.00772121
SPCC16A11.01	0	plasma membrane protein involved in inositol lipid-mediated signaling (predicted)ÊÊ Ê	0.727551	0.00774233
SPAPB8E5.04c	0	phosphatidylglycerol/phosphatidylinositol transfer protein	0.724286	0.00802166
SPCC594.04c	0	steroid oxidoreductase superfamily protein	0.723412	0.00809797
SPAC12G12.12	0	NST UDP-galactose transporter	0.7233	0.00810776
SPBC4C3.12	40422	regulator of cell separation/cytokinesis: fork head transcription factor Sep1	0.72295	0.00813855
SPAC1071.10c	pma1	P-type proton ATPase	0.722517	0.00817672
SPAC1D4.12	rad15	transcription factor TFIIH complex subunit Rad15	0.721736	0.00824606
SPAC105.01c	0	potassium ion/proton antiporter	0.720056	0.00839696
SPBC3B8.02	php5	CCAAT-binding factor complex subunit Php5	0.717827	0.00860095
SPCC790.02	pep3	late endosome to vacuole transport: zinc finger protein	0.71304	0.00905418
SPBC30D10.14	0	dienelactone hydrolase family	0.710843	0.00926928
SPBC3B8.06	0	conserved fungal protein	0.710546	0.00929871
SPAC1F3.03	0	cell polarity: Lgl family protein	0.709734	0.00937947
SPAC22G7.06c	ura1	carbamoyl-phosphate synthase	0.709582	0.00939471
SPBC32H8.13c	mok12	alpha-1,3-glucan synthase	0.70897	0.00945617
SPAC926.03	rlc1	myosin II regulatory light chain	0.7081	0.00954411
SPAC9E9.04	0	bap31homolog	0.707966	0.0095577
SPAC56F8.13	0	dubious ORF	0.70782	0.00957257
SPAC1786.02	0	fungal cell wall: phospholipase	0.705619	0.00979895
SPAC3H8.06	aur1	inositol phosphorylceramide synthase	0.705251	0.00983733
SPCC1281.04	0	vitamin metabolism: pyridoxal reductase	0.704604	0.00990495
SPCC645.06c	rgf3	regulator of cell separation/cytokinesis: RhoGEF Rgf3	0.704393	0.00992716
SPAC1687.22c	puf3	RNA-binding PUMILIO protein: deadenylation-dependent decay	0.704151	0.00995266
SPCC4G3.12c	0	zinc finger protein	0.699886	0.0104113
SPAC5D6.07c	pxa1	late endosome to vacuole transport: PXA domain protein; golgi retrograde transport	0.698876	0.0105226
SPAC23C11.06c	0	hydrolase (predicted)	0.696285	0.0108131
SPBC1D7.02c	scr1	transcription factor Scr1	0.695845	0.010863
SPBC15D4.04	gpt2	UDP-N-acetylglucosamine--dolichyl-phosphate N-acetylglucosaminephosphotransferase	0.695377	0.0109165
SPCC4G3.08	psk1	serine/threonine protein kinase Psk1	0.694779	0.0109851
SPCC736.11	ago1	RNA interference/centromere silencing: argonaute	0.694657	0.0109991
SPCC1259.02c	0	peptidase family M28	0.694582	0.0110078
SPAC1399.01c	0	purine permease	0.693861	0.0110912
SPBC16C6.06	pep1	corting receptor for CPY	0.693836	0.0110941
SPCC830.03	0	rRNA processing: AAA family ATPase Grc3 (predicted)	0.692284	0.0112755
SPBC1198.06c	0	mannan endo-1,6-alpha-mannosidase	0.691244	0.0113986
SPCC74.09	mug24	RNA-binding protein	0.688578	0.0117195
SPAC15A10.05c	mug182	YjeF family proteinÊÊ Ê	0.688528	0.0117256
SPBC30B4.01c	wsc1	transmembrane receptor Wsc1	0.688302	0.0117532
SPAC3F10.02c	trk1	potassium ion transporter Trk1	0.687307	0.0118753
SPAC22F8.05	0	alpha,alpha-trehalose-phosphate synthase	0.687065	0.0119052
SPBC27B12.06	gpi13	phospholipid biosynthesis: GPI anchor biosynthesis protein	0.686865	0.0119299
SPCC736.12c	mmi1	YTH family protein Mmi1: negative regulator of meiosisÊÊ Ê	0.686688	0.0119519
SPCC576.01c	0	sulfonate dioxygenase	0.684357	0.0122441
SPBC28E12.06c	lvs1	beige protein homolog	0.68402	0.0122868
SPAC824.04	0	mRNA polyadenylation: WD repeat protein	0.683362	0.0123707
SPBC21C3.01c	vps13a	late endosome to vacuole transport: chorein homolog	0.681933	0.0125545
SPCC830.08c	0	Golgi membrane protein	0.680265	0.0127723
SPAC1F12.05	0	endocytosis regulator (predicted)ÊÊ	0.679351	0.012893
SPBC1734.12c	alg12	phospholipid biosynthesis: dolichyl pyrophosphate Man7GlcNAc2 alpha-1,3-glucosyltransferase Alg12	0.678803	0.0129658
SPCC1840.07c	0	calcineurin-like phosphoesterase	0.677301	0.0131674
SPAC227.01c	0	EXS family protein	0.676653	0.0132552
SPCC962.01	0	C2 domain	0.67638	0.0132924
SPAC1A6.09c	lag1	sphingosine N-acyltransferase	0.67585	0.0133648
SPCC4B3.13	0	MatE family transporter	0.674644	0.0135307
SPBC3E7.05c	0	conserved hypothetical: human mitofilin (IMMT) ortholog	0.673977	0.0136234
SPCC5E4.04	cut1	separin	0.670448	0.0141226
SPCC74.04	0	amino acid permease family	0.669832	0.0142115
SPAC1D4.10	0	tRNA endonuclease	0.66953	0.0142551
SPBC16G5.16	0	transcription factor	0.66699	0.0146275
SPBC19C2.11c	0	mitochondrial outer membrane protein	0.666085	0.0147621
SPCC1494.03	arz1	armadillo repeat containing, Zfs1 target number 1Ê	0.665223	0.0148915
SPBP35G2.06c	nup131	nucleoporin	0.664818	0.0149527
SPBP23A10.11c	0	fungal cell wall: glycoprotein	0.663878	0.0150953
SPAC27F1.05c	0	aminotransferase	0.663578	0.0151411
SPBC1778.04	spo6	Spo4-Spo6 kinase complex regulatory subunit Spo6	0.663363	0.0151739
SPAC644.06c	cdr1	GIN4 family protein kinase Cdr1	0.663051	0.0152219
SPAC22A12.07c	ogm1	protein O-mannosyltransferase Ogm1	0.662849	0.0152529
SPBC119.11c	pac1	rRNA processing: double-strand-specific ribonuclease Pac1	0.661291	0.0154943
SPBC14F5.10c	0	zinc finger protein	0.660604	0.0156017
SPCC1620.11	0	nucleoporin	0.658338	0.0159609
SPAC227.03c	0	mitochondrial NAD+ transporter	0.658274	0.0159712
SPCC584.11c	0	Svf1 family protein	0.657509	0.0160941
SPCC4B3.04c	nte1	lysophospholipase	0.656387	0.016276
SPAC1952.01	0	phospholipid biosynthesis: GPI-anchor transamidase complex 5th subunit	0.655067	0.0164922
SPCC63.08c	ppk36	serine/threonine protein kinase Ppk36	0.655055	0.0164941
SPBC23G7.08c	rga7	actin cortical patch: GTPase activating protein	0.654397	0.0166029
SPAPB2B4.07	0	conserved hypothetical: ubiquitin family protein, human UBTD1 homologÊÊ Ê	0.653955	0.0166762
SPCC757.11c	0	membrane transporter	0.652654	0.016894
SPAC24B11.09	0	conserved hypothetical: human BRP44 ortholog	0.651357	0.0171135
SPBC409.18	0	phosphatidic acid phosphatase	0.649308	0.0174655
SPMIT.07	atp6	F0-ATPase subunit 6	0.648008	0.0176918
SPAC22E12.14c	sck2	serine/threonine protein kinase Sck2	0.646505	0.017957
SPAC869.04	0	formamidase-like protein	0.646378	0.0179795
SPAC513.07	0	cinnamoyl-CoA reductase	0.646068	0.0180348
SPBC776.16	0	sequence orphan (spindle pole body)	0.645939	0.0180577
SPAC1805.16c	0	purine nucleoside phosphorylase	0.645913	0.0180624
SPAC26A3.10	0	ADP-ribosylation factor	0.64484	0.0182547
SPBC30D10.10c	tor1	phosphatidylinositol kinase Tor1	0.644517	0.0183131
SPAC664.15	0	WD repeat protein	0.644459	0.0183236
SPAC1A6.03c	0	fungal cell wall: phospholipase	0.644334	0.0183462
SPAC513.05	mns2	alpha-mannosidase	0.643209	0.0185506
SPBC839.08c	its8	phospholipid biosynthesis: pig-N	0.641084	0.0189424
SPBC691.04	0	DEAD/DEAH box helicase	0.641019	0.0189545
SPBC776.15c	0	aerobic respiration: dihydrolipoamide S-succinyltransferase	0.640787	0.0189977
SPCC285.10c	0	conserved hypothetical: SPRY domain protein	0.640051	0.0191354
SPBC16D10.05	mok13	1,3-beta-glucan biosynthesis: alpha-1,3-glucan synthase	0.639389	0.0192599
SPBC3H7.06c	pof9	F-box protein	0.638308	0.0194651
SPAC57A10.06	mug15	sequence orphanÊÊ Ê	0.637804	0.0195612
SPCC569.05c	0	spermidine family transporter	0.637626	0.0195954
SPAC29B12.10c	0	OPT oligopeptide transporter family	0.637034	0.019709
SPAC589.12	0	phospholipid biosynthesis: cell wall organization membrane protein	0.636688	0.0197759
SPAPJ691.02	0	conserved hypothetical: yippee-like protein; DiGeorge syndromeÊÊ Ê	0.63498	0.0201081
SPAC6B12.07c	0	zinc finger protein	0.634003	0.0203005
SPMIT.10	atp9	F0-ATPase subunit 9	0.633858	0.0203292
SPBC530.08	0	transcription factor	0.632591	0.0205811
SPAC24B11.07c	0	ketopantoate reductase (predicted)Ê	0.632374	0.0206247
SPBC25H2.08c	mrs2	magnesium ion transporter	0.631825	0.020735
SPAC9G1.02	wis4	MAP kinase kinase kinase Wis4	0.631694	0.0207614
SPCC290.04	ams2	cell cycle regulated GATA-type transcription factor Ams2	0.631019	0.0208978
SPBP35G2.11c	0	zinc finger protein	0.630782	0.0209458
SPAPB1E7.05	0	glycerophosphoryl diester phosphodiesterase	0.629875	0.0211308
SPBC1604.05	pgi1	glycolysis: glucose-6-phosphate isomerase	0.628933	0.0213242
SPAC19G12.10c	cpy1	serine carboxypeptidase	0.628903	0.0213305
SPBC24C6.04	0	delta-1-pyrroline-5-carboxylate dehydrogenase	0.628698	0.0213728
SPAC328.04	0	AAA family ATPase	0.627883	0.0215419
SPAC19G12.02c	pms1	MutL family	0.627858	0.0215471
SPAC2E1P3.04	0	copper amine oxidase	0.627197	0.0216851
SPBC1E8.03c	0	conserved fungal proteinÊÊ Ê	0.62673	0.021783
SPAC15A10.06	0	CPA1 sodium ion/proton antiporter	0.624242	0.0223114
SPAC6F6.06c	rax2	cell polarity: plasma membrane protein	0.622536	0.0226802
SPCC1739.01	0	zinc finger protein	0.622308	0.0227297
SPAC57A7.05	0	conserved protein (fungal and plant)	0.622157	0.0227628
SPCC24B10.07	gad8	serine/threonine protein kinase Gad8	0.620987	0.0230195
SPBC16A3.12c	0	triglyceride lipase-cholesterol esterase	0.620294	0.0231727
SPBC56F2.08c	0	RNA-binding PUMILIO protein: deadenylation-dependent decay	0.620151	0.0232045
SPAC27F1.07	0	dolichyl-diphospho-oligosaccharide-protein glycosyltransferase	0.617797	0.0237322
SPAC4G9.04c	0	mRNA polyadenylation: cleavage and polyadenylylation specificity factor	0.617513	0.0237966
SPBC32H8.12c	act1	actin cortical patch/cell polarity: actin	0.617471	0.0238061
SPAC12B10.15c	0	DNA replication: RNase H1 small subunit: DNA replication, removal of RNA primer	0.61447	0.024496
SPBC21C3.09c	0	fumarylacetoacetate	0.614324	0.02453
SPAC328.07c	0	heavy metal ion homeostasis protein	0.613815	0.0246487
SPBC16G5.09	0	serine carboxypeptidase	0.613172	0.0247998
SPAC2G11.03c	vps45	sec1 family	0.610014	0.0255521
SPCC757.03c	0	oxidative stress response: conserved hypothetical: ThiJ domain proteinÊÊ Ê	0.609405	0.0256995
SPAC3F10.11c	0	ABC transporter family	0.608885	0.025826
SPAC4F10.07c	atg13	autophagy associated protein Atg13	0.608066	0.0260261
SPAC24B11.12c	0	P-type ATPase	0.606946	0.0263022
SPBC1711.10c	npl4	Cdc48-Ufd1-Npl4 complex component	0.604998	0.026788
SPAC1D4.05c	0	EXS family protein	0.604815	0.026834
SPBC29A3.21	0	sequence orphan (ER)	0.604664	0.0268722
SPAC4A8.04	isp6	serine protease	0.604288	0.0269671
SPCC1906.01	mpg1	mannose-1-phosphate guanyltransferase Mpg1	0.603753	0.0271027
SPAC31G5.06	0	conserved hypothetical: mitochondrial proteinÊÊ Ê	0.603412	0.0271893
SPAC1D4.11c	lkh1	regulator of cell separation/cytokinesis: dual specificity protein kinase Lkh1	0.602188	0.0275027
SPBC8E4.03	0	arginase family	0.601856	0.0275881
SPAC19B12.02c	gas1	fungal cell wall: 1,3-beta-glucanosyltransferase (predicted)	0.601732	0.0276202
SPBC800.05c	tub1	microtubule movement: tubulin alpha 2	0.601181	0.0277629
SPBC4F6.12	0	LIM domain	0.600781	0.0278667
SPAC1006.05c	och1	alpha-1,6-mannosyltransferase	0.600018	0.0280658
SPAC4F8.13c	rng2	IQGAP	0.599442	0.0282168
SPCC736.13	0	short chain dehydrogenase	0.599387	0.0282312
SPAC29B12.14c	0	purine transporter	0.598438	0.0284818
SPAC11D3.06	0	MatE family transporter	0.594702	0.0294872
SPAC31G5.11	pac2	cAMP-independent regulatory protein Pac2	0.594447	0.0295571
SPAC607.08c	0	conserved hypothetical: DUF726 family protein	0.59415	0.0296383
SPCC18B5.11c	cds1	DNA replication initiation: replication checkpoint kinase Cds1	0.592282	0.0301547
SPAC26H5.05	0	ankyrin repeat protein	0.590787	0.0305734
SPCC1223.08c	dfr1	dihydrofolate reductase Dfr1	0.590041	0.0307841
SPAC2F7.10	0	palmitoyltransferase	0.589855	0.0308369
SPCC24B10.15	0	PINc domain	0.588864	0.0311193
SPAC1639.02c	trk2	potassium ion transporter Trk2	0.588401	0.031252
SPCC126.09	0	zinc ion homeostasis: vacuolar membrane zinc transporter	0.588396	0.0312535
SPAC4G9.06c	chz1	histone chaperone Chz1 (predicted)Ê	0.588011	0.0313642
SPAC688.03c	0	conserved hypothetical: human AMMECR1 homolog	0.587731	0.0314448
SPAPB18E9.02c	ppk18	serine/threonine protein kinase Ppk18	0.587452	0.0315256
SPCC330.06c	0	oxidative stress response/redox homeostasis: thioredoxin peroxidase	0.587008	0.0316541
SPAC25G10.01	0	RNA-binding protein	0.586805	0.0317131
SPCC13B11.01	adh1	alcohol dehydrogenase	0.586313	0.0318564
SPAC22A12.10	0	phospholipid biosynthesis: aminoalcoholphosphotransferase	0.584883	0.0322762
SPBC23G7.06c	0	conserved eukaryotic protein	0.584524	0.0323825
SPCC1322.10	pwp1	fungal cell wall: protein Pwp1ÊÊ Ê	0.583251	0.032761
SPCC4G3.06c	mrpl4	mitochondrial ribosomal protein subunit L4	0.582976	0.0328433
SPAC167.01	ppk4	serine/threonine protein kinase Ppk4	0.582186	0.0330807
SPCC330.10	pcm1	mRNA capping methyltransferase	0.581675	0.033235
SPBC16C6.09	ogm4	protein O-mannosyltransferase Ogm4	0.581643	0.0332449
SPBC29A3.11c	0	mitochondrial carboxylic acid transporter	0.581064	0.0334204
SPBC530.09c	0	cation dependent mannose-6-phosphate cargo receptor	0.580516	0.0335874
SPAC3H5.08c	0	WD repeat protein	0.580455	0.0336061
SPBC409.07c	wis1	MAP kinase kinase Wis1	0.580296	0.0336549
SPBC428.19c	0	rRNA processing: U3 snoRNP protein Utp15 (predicted)	0.57975	0.0338221
SPAC3H8.02	0	sec14 cytosolic factor family	0.579614	0.0338641
SPAC25B8.04c	0	mitochondrial splicing suppressor	0.579562	0.0338798
SPAC2C4.17c	0	MS ion channel	0.578831	0.0341056
SPAC23H3.14	0	LAlv9 family protein, involved in post Golgi transportÊÊ Ê	0.578583	0.0341824
SPAC1834.11c	sec18	secretory protein Sec18	0.57835	0.0342547
SPAC1D4.14	0	THO complex	0.57821	0.0342982
SPAC2F3.05c	0	aldo/keto reductase	0.577693	0.0344592
SPBP16F5.08c	0	flavin dependent monooxygenase	0.576939	0.0346952
SPCC1827.02c	0	phospholipid biosynthesis: cholinephosphate cytidylyltransferase	0.57686	0.0347201
SPAC17A2.11	0	sequence orphan (possible mitochondrion protein)	0.576501	0.0348331
SPAC23A1.04c	mnl1	alpha mannosidase-like protein	0.57641	0.0348616
SPCC1919.04	0	sequence orphan	0.576065	0.0349707
SPCC18.18c	fum1	aerobic respiration: fumarate hydratase	0.575428	0.0351724
SPAC1A6.07	0	fungal cell wall: proline-rich protein	0.574941	0.0353274
SPAC26H5.11	0	spore wall protein	0.574482	0.0354742
SPAC1486.01	0	oxidative stress response: manganese superoxide dismutase	0.573532	0.035779
SPAC32A11.03c	phx1	homeobox transcription factor Phx1	0.572163	0.0362228
SPAC19A8.01c	sec73	guanyl-nucleotide exchange factor	0.572057	0.0362575
SPBC30D10.11	gpi1	phospholipid biosynthesis: pig-Q	0.571363	0.0364841
SPBC1604.15	gpi16	phospholipid biosynthesis: pig-T	0.570973	0.0366122
SPAC26A3.01	sxa1	aspartic protease	0.570849	0.0366531
SPBC651.03c	gyp10	GTPase activating protein Gyp10	0.570682	0.0367079
SPBC21D10.05c	ucp3	actin cortical patch: GTPase activating protein	0.570113	0.0368959
SPAPB21F2.02	0	A. nidulans dopA homolog	0.568557	0.0374139
SPAC13G6.06c	0	glycine cleavage complex subunit P	0.566552	0.0380904
SPAC10F6.05c	ubc6	ubiquitin conjugating enzyme	0.56558	0.0384221
SPCC1183.09c	pmp31	UPF0057 family	0.565115	0.0385816
SPAC26A3.09c	rga2	GTPase activating protein	0.565018	0.0386151
SPAC29A4.19c	cta5	calcium signaling/homeostasis: Ca2+/Mn2+ transporting P-type ATPase	0.563846	0.0390197
SPBC27.03	meu25	meiotic expression upregulated	0.563186	0.0392494
SPAC14C4.05c	0	chromosome segregation protein	0.56258	0.0394612
SPBC19C7.03	cyr1	adenylate cyclase	0.56258	0.0394612
SPAC821.08c	slp1	mitotic spindle checkpoint: sleepy homolog Slp1	0.562185	0.0395999
SPBC354.14c	vac8	armadillo repeat protein	0.561852	0.039717
SPBC428.14	0	phospholipid biosynthesis: 1-acylglycerol-3-phosphate acyltransferase	0.561531	0.0398304
SPAC17G6.11c	0	glucosidase	0.560397	0.0402324
SPBC16H5.12c	0	calcineurin-like phosphoesterase	0.560061	0.0403525
mug134	#N/A	#N/A	0.559794	0.0404477
SPBC713.04c	0	rRNA processing: U3 snoRNP-associated protein Utp1	0.558854	0.0407853
SPCC622.16c	epe1	centromere silencing: transcription factor Epe1	0.558285	0.0409906
SPAC13D6.02c	byr3	zinc finger protein	0.557212	0.0413806
SPCC584.15c	0	arrestin family	0.557211	0.0413809
SPAC3G9.12	peg1	mitotic spindle component	0.5572	0.041385
SPBC16E9.11c	pub3	ubiquitin-protein ligase	0.556587	0.0416089
SPAC1A6.04c	plb1	fungal cell wall: phospholipase B homolog Plb1	0.554056	0.0425456
SPAC890.03	ppk16	serine/threonine protein kinase	0.552516	0.0431238
SPCP1E11.04c	pal1	membrane associated protein Pal1	0.552481	0.0431369
SPBC19F8.01c	spn7	septin	0.550829	0.043765
SPBC32F12.03c	gpx1	oxidative stress response: glutathione peroxidase Gpx1	0.549795	0.0441622
SPAC24H6.05	cdc25	serine/threonine protein phosphatase Cdc25	0.549457	0.0442923
SPCC1183.01	sec15	exocyst complex subunit Sec15	0.549335	0.0443397
SPBC405.02c	0	sequence orphan	0.549282	0.0443601
SPCC285.04	0	transthyretin	0.548557	0.0446414
SPAC1786.01c	0	triacylglycerol lipase	0.548251	0.0447605
SPBC1271.06c	mug96	sequence orphan: role in meiosis	0.547499	0.0450545
SPAC17G6.04c	cpp1	protein farnesyltransferase beta subunit Cpp1	0.547492	0.0450573
SPAC4D7.01c	sec71	Sec7 domain	0.546686	0.0453742
SPAC2F7.03c	pom1	cell polarity: DYRK family protein kinase Pom1	0.546521	0.0454393
SPBC31E1.02c	pmr1	calcium signaling/homeostasis: P-type ATPase, calcium transporting	0.545939	0.0456695
SPAC664.13	0	sequence orphan	0.545938	0.0456698
SPBC336.12c	cdc10	G1/S transition: MBF transcription factor complex subunit Cdc10	0.545859	0.0457009
SPCC777.07	0	glycosyl transferase family 15	0.545812	0.0457197
SPAC11E3.05	0	WD repeat protein	0.545495	0.0458455
SPBC725.05c	0	nucleotide pyrophosphatase	0.542177	0.0471815
SPAC19D5.01	pyp2	tyrosine phosphatase Pyp2	0.542096	0.0472147
SPBC902.03	0	Spo7 homolog	0.541732	0.0473633
SPAC3G9.11c	0	pyruvate decarboxylase	0.540825	0.0477353
SPCC18B5.03	wee1	DNA replication initiation: dual specificity protein kinase Wee1	0.540292	0.0479549
SPBC3E7.06c	0	membrane transporter	0.539418	0.0483169
SPBC15D4.01c	0	microtubule movement: kinesin-like protein	0.538294	0.0487864
SPCC757.05c	0	peptidase family M20	0.537805	0.0489916
SPBP8B7.15c	0	mRNA polyadenylation: ubiquitin-protein ligase E3 RBBP6 family involved in mRNA cleavage (predicted)	0.536139	0.0496965
SPBC14F5.13c	0	alkaline phosphatase	0.536105	0.0497111
SPMIT.05	cob	cytochrome b	0.535584	0.0499331
SPBC15C4.04c	0	amino acid permease family	0.53541	0.0500076
SPCC777.08c	bit61	TORC2 subunit: TOR signalling pathway	0.535353	0.0500321
SPCC970.06	0	cargo receptor for soluble proteins	0.534475	0.0504089
SPACUNK4.07c	cta4	calcium signaling/homeostasis/cell polarity: P-type ATPase	0.534187	0.050533
SPAC24C9.08	0	vacuolar carboxypeptidase	0.534119	0.0505625
SPAC1705.03c	ecm33	fungal cell wall: GPI anchored protein	0.533927	0.0506453
SPAC14C4.12c	0	SWIRM domain	0.533364	0.0508894
SPAC4G8.12c	0	phospholipid biosynthesis: PMP protein	0.533107	0.0510011
SPBC21B10.09	0	acetyl-CoA transporter	0.532009	0.0514808
SPAC513.02	0	phosphoglycerate mutase family	0.531986	0.0514905
SPAC328.02	0	UBA domain protein	0.531945	0.0515088
SPBC646.08c	0	oxysterol binding protein	0.531715	0.0516098
SPAC13A11.02c	erg11	ergosterol biosynthesis: cytochrome p450 family	0.531568	0.0516743
SPBC887.02	0	ClC chloride channel	0.530795	0.0520152
SPBC8D2.07c	sfc9	transcription factor TFIIIC complex subunit Sfc9	0.530512	0.0521405
SPBC2F12.05c	0	ankyrin repeat protein	0.53034	0.0522168
SPBC4F6.06	kin1	cell polarity: microtubule affinity-regulating kinase Kin1	0.529785	0.0524636
SPBC29B5.01	atf1	transcription factor Atf1	0.528868	0.0528732
SPBC106.01	mph1	mitotic spindle checkpoint: dual specificity protein kinase Mph1	0.528342	0.0531094
SPCC553.01c	0	telomere maintenance: conserved hypothetical: CHCH domain protein (predicted)Ê	0.527864	0.0533248
SPAC6G10.12c	ace2	transcription factor Ace2	0.52739	0.0535395
SPCC1919.01	ppk34	serine/threonine protein kinase Ppk34	0.527355	0.053555
SPBC3E7.09	0	Sad1-UNC-like C-terminal	0.526256	0.054055
SPAC57A7.08	pzh1	serine/threonine protein phosphatase Pzh1	0.526121	0.0541167
SPBC530.01	gyp1	GTPase activating protein	0.526029	0.054159
SPAC3H1.12c	snt2	Lid2 complex subunit Snt2	0.525718	0.0543013
SPAC3A12.06c	0	sodium/calcium exchanger	0.525537	0.0543841
SPCC594.01	0	conserved hypothetical: DUF1769 family proteinÊÊ Ê	0.525462	0.0544189
SPCC31H12.02c	0	ion channel	0.525231	0.0545251
SPAC1805.17	crm1	nuclear export receptor Crm1	0.523599	0.0552801
SPAP27G11.10c	nup184	nucleoporin	0.523408	0.0553689
SPBC530.11c	0	transcription factor	0.522666	0.0557155
SPBC19G7.17	0	translocon subunit Sec61 homolog	0.522592	0.05575
SPCC553.12c	0	conserved fungal protein	0.522586	0.0557529
SPAC22A12.06c	0	serine hydrolase	0.522328	0.055874
SPCC1672.11c	0	P-type ATPase	0.52226	0.0559057
SPAC1635.01	0	voltage-dependent anion-selective channel	0.521076	0.0564643
SPCC132.05c	0	pseudogene	0.520203	0.0568791
SPBC18H10.05	0	WD repeat protein	0.520027	0.056963
SPBC577.13	0	inositol polyphosphate phosphatase	0.519396	0.0572646
SPAC1071.05	0	S-adenosylmethionine-dependent methyltransferase	0.518378	0.057754
SPCC1919.12c	0	peptidase family M28	0.517746	0.0580599
SPMIT.04	cox3	aerobic respiration: cytochrome c oxidase 3	0.517372	0.0582413
SPAC10F6.06	vip1	rrm RNA recognition motif	0.517322	0.0582657
SPCC191.03c	0	sequence orphan	0.517249	0.0583012
SPAC1006.09	win1	MAP kinase kinase kinase Win1	0.517	0.0584224
SPBC1105.08	0	EMP70 family	0.516617	0.0586093
SPBC19C7.11	0	ClC chloride channel	0.515977	0.0589225
SPBC21H7.03c	0	fungal cell wall: acid phosphatase	0.515497	0.0591584
SPAC4F10.16c	0	P-type ATPase	0.515299	0.0592557
SPCC645.07	rgf1	1,3-beta-glucan biosynthesis: RhoGEF Rgf1	0.515218	0.0592959
SPBC8E4.05c	0	3-carboxy-cis,cis-muconate cycloisomerase	0.514052	0.059873
SPAC20G8.04c	0	vitamin metabolism: electron transfer flavoprotein-ubiquinone oxidoreductase	0.514051	0.0598735
SPAC30D11.06c	0	conserved hypothetical: DUF300 family protein	0.513087	0.0603548
SPBC29A10.07	0	nucleoporin	0.512906	0.0604453
SPBC83.18c	0	C2 domain	0.512279	0.0607603
SPBC8D2.01	gsk31	serine/threonine protein kinase Gsk31	0.51217	0.0608152
SPAP32A8.02	0	aldo/keto reductase	0.511418	0.061195
SPAC3G9.14	sak1	transcriptional repressor	0.511418	0.0611951
SPAC144.12	0	vitamin metabolism: ribose 5-phosphate isomerase	0.509983	0.0619249
SPBC21C3.14c	0	sequence orphan	0.509217	0.0623175
SPBC1861.09	ppk22	serine/threonine protein kinase	0.509045	0.062406
SPBC8D2.20c	sec31	COPII-coated vesicle component	0.509017	0.0624202
SPBC18A7.02c	0	seven transmembrane receptor-like protein	0.508929	0.0624656
SPAC513.01c	eft201	translation elongation factor 2	0.508724	0.0625715
SPAC57A7.09	0	zinc finger protein	0.508231	0.062826
SPBC15D4.07c	atg9	autophagy associated protein Atg9	0.507544	0.0631825
SPAC22E12.09c	krp1	kexin	0.507225	0.0633484
SPAC10F6.11c	0	kinase activator	0.504995	0.0645192
SPAC3H8.09c	nab3	poly(A) binding protein Nab3 (predicted)Ê	0.504902	0.0645681
SPAC29B12.11c	0	conserved hypothetical: human WW domain binding protein-2 orthologÊÊ Ê	0.50472	0.0646644
SPBC106.02c	srx1	oxidative stress response: sulphiredoxin	0.504668	0.0646922
SPAC25B8.12c	0	nucleotide-sugar phosphatase (predicted)	0.504419	0.0648243
SPBPB7E8.02	0	conserved hypothetical: PSP1 family protein	0.504286	0.0648948
SPBC336.04	cdc6	DNA replication: DNA polymerase delta catalytic subunit Cdc6	0.504024	0.0650344
SPCC576.03c	tpx1	oxidative stress response/redox homeostasis: thioredoxin peroxidase Tpx1	0.503429	0.065352
SPBC409.08	0	spermine transporter family	0.503346	0.065396
SPAC10F6.13c	0	aspartate aminotransferase	0.502712	0.0657362
SPCC757.13	0	membrane transporter	0.50198	0.0661303
SPBC25B2.11	pof2	F-box protein	0.501579	0.0663467
SPCC1259.08	0	conserved fungal proteinÊÊ Ê	0.501284	0.0665068
SPCC794.06	0	TDT malic acid transporter	0.501059	0.0666289
SPCC1840.08c	0	protein disulfide isomerase	0.50062	0.0668675
SPBC1E8.02	0	ubiquitin family protein	0.500481	0.0669433
SPBC1861.04c	0	mRNA splicing: RNA-binding protein Prp24 Ê	0.500191	0.0671017
SPAC16C9.05	0	zinc finger protein	0.499252	0.0676164
SPCC622.01c	0	dubious ORF	0.498073	0.068267
SPBC1685.07c	0	amino acid transporter	0.497722	0.068462
SPBC839.15c	ef1a-c	translation elongation factor EF-1 alpha	0.497649	0.0685026
SPBC8D2.17	0	alpha-1,2-galactosyltransferase	0.497332	0.0686788
SPBC2G2.05	rpl1603	60S ribosomal protein L13/L16	0.497106	0.0688047
SPBC1778.06c	fim1	actin cortical patch/cell polarity: fimbrin	0.496794	0.0689789
SPBC25B2.10	0	Usp	0.496479	0.0691551
SPAC4D7.11	0	conserved fungal protein	0.496323	0.0692423
SPBP35G2.14	0	RNA-binding PUMILIO protein: deadenylation-dependent decay	0.496311	0.0692494
SPBC365.16	0	sequence orphan (mitochondrion)	0.496268	0.0692733
SPCC306.11	0	sequence orphan	0.496231	0.0692939
SPCC737.04	0	S. pombe specific UPF0300 family protein 6	0.495839	0.0695139
SPAC24C9.14	otu1	OTU-like cysteine protease	0.494318	0.0703741
SPAC637.07	moe1	translation initiation factor eIF3d Moe1	0.493907	0.0706078
SPAC11H11.06	arp2	actin cortical patch: ARP2/3 actin-organizing complex subunit Arp2	0.493481	0.070851
SPBC21.02	0	TLDc domain	0.493377	0.07091
SPAC23E2.03c	ste7	meiotic suppressor protein Ste7	0.491082	0.072232
SPCC777.02	0	transcription factor	0.490936	0.0723173
SPBC28E12.03	rga4	GTPase activating protein	0.490882	0.0723485
SPBP16F5.03c	0	phosphatidylinositol kinase	0.490508	0.0725661
SPCC74.06	mak3	oxidative stress response: histidine kinase Mak3	0.490298	0.0726883
SPAC3G9.05	0	cell polarity: GTPase activating protein	0.490176	0.0727595
SPAC25B8.13c	isp7	2 OG-Fe	0.489513	0.0731474
SPBC11B10.08	0	conserved fungal proteinÊÊ Ê	0.489069	0.0734081
SPCC1235.03	0	smr domain protein	0.488276	0.0738757
SPAC13G7.04c	mac1	membrane anchored protein Mac1	0.48748	0.0743475
SPCC1450.12	0	conserved fungal proteinÊÊ Ê	0.48721	0.0745081
SPAPB1A10.07c	0	sphingolipid biosynthesis proteinÊ(predicted) Ê	0.485962	0.0752542
SPCC830.07c	psi1	DNAJ domain protein	0.485378	0.0756053
SPCC1235.08c	pdh1	conserved hypothetical: DUF1751 family protein	0.485311	0.0756456
SPBC1A4.10c	pmc1	mediator complex subunit Pmc1	0.483742	0.0765967
SPBC1718.07c	zfs1	mitotic spindle checkpoint: zinc finger protein	0.48356	0.0767076
SPBC119.07	ppk19	serine/threonine protein kinase	0.483516	0.0767339
SPBC211.04c	mcm6	DNA replication initiation: MCM complex subunit Mcm6	0.482765	0.0771931
SPBC16G5.14c	rps3	40S ribosomal protein S3	0.48184	0.0777617
SPBC725.02	mpr1	oxidative stress response: speedy; histidine-containing response regulator phosphotransferase Mpr1	0.481537	0.0779489
SPBC2F12.13	klp5	microtubule movement: kinesin-like protein	0.481176	0.0781718
SPBC3B8.07c	dsd1	fatty acid biosynthesis: dihydrosphingosine delta-4 desaturase	0.48112	0.0782067
SPBC1921.05	ape1	aminopeptidase	0.481091	0.0782242
SPCC962.03c	cut15	karyopherin	0.480915	0.0783333
SPBC646.12c	gap1	conjugation: GTPase activating protein Gap1	0.480883	0.0783536
SPAC4F10.18	0	WD repeat protein	0.480758	0.078431
SPAC3C7.09	set8	lysine methyltransferase Set8	0.480238	0.0787541
SPBC29B5.04c	0	actin cortical patch: actin cortical patch proteinÊÊ Ê	0.480045	0.0788746
SPCC830.05c	0	histone acetyltransferase complex subunit	0.479873	0.078982
SPAC17A5.10	0	conserved fungal proteinÊÊ Ê	0.479767	0.0790482
SPCC5E4.05c	0	abhydrolase family	0.479624	0.0791373
SPBC1105.05	exg1	fungal cell wall: glucan 1,3-beta-glucosidase I/II precursor	0.478953	0.0795581
SPCC663.03	pmd1	ABC transporter family	0.478407	0.0799015
SPCC777.05	gtr2	Gtr1/RagA G protein	0.47816	0.0800573
SPCC4G3.11	mug154	conserved fungal protein	0.477758	0.0803114
SPAC17A2.14	0	metal ion transporter	0.477751	0.0803157
SPAC4F8.11	0	WD repeat protein	0.477601	0.0804107
SPBC28F2.03	ppi1	cyclophilin	0.476871	0.0808745
SPCC550.09	0	pex24 family	0.47575	0.0815902
SPAPJ760.02c	app1	actin cortical patch: App1 protein	0.47501	0.0820655
SPAC19E9.03	pas1	G1/S transition:cyclin	0.474981	0.0820845
SPAC23C4.14	alg1	mannosyltransferase complex subunit Alg1	0.473877	0.0827978
SPAC11G7.02	pub1	ubiquitin-protein ligase	0.473268	0.0831938
SPBC244.01c	sid4	SIN component scaffold protein	0.473115	0.0832934
SPBC1734.07c	0	TRAPP	0.472976	0.083384
SPAC1687.15	gsk3	serine/threonine protein kinase Gsk3	0.472116	0.0839467
SPAC458.05	pik3	phosphatidylinositol 3-kinase Pik3	0.471601	0.0842853
SPCC16A11.06c	gpi10	phospholipid biosynthesis: pig-B	0.4708	0.0848137
SPCC1223.10c	eaf1	RNA polymerase II transcription elongation factor	0.470759	0.0848405
SPAC24H6.11c	0	sulfate transporter	0.47036	0.0851052
SPBC19C2.09	sre1	ergosterol biosynthesis: membrane-tethered transcription factor	0.469258	0.0858382
SPBC16H5.13	0	WD repeat protein	0.469158	0.085905
SPCP1E11.03	0	arrestin family	0.468219	0.0865346
SPBC685.03	0	sequence orphan (ER)	0.467513	0.0870103
SPAC167.05	0	Usp	0.467465	0.0870429
SPCC4B3.07	0	coiled-coil	0.466401	0.087764
SPAC3A11.11c	0	aldo/keto reductase	0.466159	0.0879287
SPBC11G11.02c	end3	actin cortical patch: component End3 (predicted)ÊÊ	0.466115	0.0879584
SPCC1322.08	srk1	MAPK-activated protein kinase Srk1	0.465525	0.0883611
SPBC15C4.05	0	ATP-dependent	0.464802	0.0888569
SPAC4H3.10c	pyk1	glycolysis: pyruvate kinase	0.464537	0.0890389
SPCP31B10.07	eft202	translation elongation factor 2	0.46451	0.0890575
SPAC13G7.12c	0	phospholipid biosynthesis: choline kinase	0.46433	0.0891813
SPAC222.14c	0	GTP binding protein	0.464328	0.0891829
SPBC725.04	0	oxalyl-CoA decarboxylase	0.46375	0.0895817
SPAP14E8.02	tos4	homolog of S. cerevisiae Tos4Ê(SBF)Ê Ê	0.462884	0.0901817
SPAC7D4.02c	0	conserved hypothetical: src (SH3) homology domain proteinÊÊ Ê	0.462565	0.090404
SPCC1795.08c	0	Myb family	0.462495	0.0904527
SPBC211.03c	0	guanyl-nucleotide exchange factor activity	0.462324	0.0905714
SPAC22E12.06c	gmh3	alpha-1,2-galactosyltransferase Gmh3	0.46099	0.0915061
SPBC4.03c	0	late endosome to vacuole transport: COPII-coated vesicle component Sfb3 (putative)	0.46037	0.0919425
SPAC24C9.06c	0	aerobic respiration: aconitate hydratase	0.460361	0.091949
SPAC926.09c	fas1	fatty acid biosynthesis: fatty acid synthase beta subunit Fas1	0.459274	0.092719
SPBC713.07c	0	vacuolar polyphosphatase	0.458982	0.0929268
SPBC27.08c	sua1	sulfate adenylyltransferase	0.457787	0.0937805
SPBC16D10.06	0	ZIP zinc transporter domain	0.456951	0.0943819
SPAP11E10.02c	mam3	cell agglutination protein Mam3ÊÊ Ê	0.453751	0.096711
SPAPB1E7.04c	0	fungal cell wall: chitinase	0.452894	0.0973434
SPCC1322.01	0	3'-5' exonuclease for RNA 3' ss-tail	0.452238	0.0978286
SPAC31A2.16	gef2	RhoGEF Gef2	0.452116	0.0979194
SPAC19G12.14	its3	1-phosphatidylinositol-4-phosphate 5-kinase Its3	0.451663	0.098256
SPAC7D4.11c	sec39	secretory pathway protein Sec39	0.451555	0.0983363
SPAC17G8.06c	0	amino acid/isoleucine synthesis: dihydroxy-acid dehydratase	0.451033	0.0987259
SPAC821.04c	cid13	mRNA polyadenylation: poly(A) polymerase Cid13ÊÊ Ê	0.450723	0.0989577
SPBC16A3.02c	0	mitochondrial peptidase	0.450223	0.0993326
SPAC8C9.16c	mug63	oxidative stress response: mitochondrial protein	0.45002	0.0994855
SPAC6F6.13c	0	conserved hypothetical: DUF726 family proteinÊÊ Ê	0.449809	0.0996439
SPAC17G8.11c	0	mannosyltransferase complex subunit	0.449409	0.0999458
SPAC3H1.09c	0	amino acid transporter	0.449326	0.100008
SPCPB1C11.02	0	amino acid permease family	0.448931	0.100307
SPAC1805.14	0	sequence orphan	0.448727	0.100461
SPAC3A12.05c	taf2	TATA-binding protein	0.448458	0.100665
SPCC663.05c	cia1	chaperone	0.448436	0.100682
SPCC330.12c	sdh3	aerobic respiration: succinate dehydrogenase	0.448349	0.100748
SPBC902.05c	idh2	aerobic respiration: isocitrate dehydrogenase	0.448034	0.100987
SPCC4G3.10c	rhp42	DNA repair protein Rhp42	0.447984	0.101025
SPAC1296.04	mug65	spore wall assembly protein (predicted)ÊÊ	0.447714	0.101232
SPAC806.05	0	conserved hypothetical: DUF1763 family proteinÊÊ Ê	0.447705	0.101238
SPBC2F12.15c	0	palmitoyltransferase	0.447497	0.101397
SPAC7D4.12c	0	conserved hypothetical: DUF1212 family protein	0.447473	0.101415
SPBC354.09c	0	protease	0.447389	0.10148
SPBC342.05	crb2	DNA replication initiation: BRCT domain	0.447363	0.101499
SPAC26H5.13c	0	conserved hypothetical: DUF1753 family protein	0.446805	0.101926
SPBC23E6.04c	utp10	rRNA processing: U3 snoRNP-associated protein	0.446688	0.102016
SPAC1420.04c	cox1101	cytochrome c oxidase assembly protein Cox1101	0.445939	0.102592
SPBC1604.14c	shk1	cell polarity: PAK-related kinase Shk1	0.4455	0.102931
SPAC4C5.01	0	haloacid dehalogenase	0.445431	0.102984
SPAC12G12.09	0	sequence orphan	0.445304	0.103082
SPAC25B8.03	0	phospholipid biosynthesis: phosphatidylserine decarboxylase	0.44491	0.103387
SPCC18.02	0	membrane transporter	0.444903	0.103393
SPAC19G12.11	coq9	aerobic respiration: ubiquinone biosynthesis protein Coq9	0.443923	0.104154
SPCC1739.11c	cdc11	SIN component scaffold protein Cdc11	0.443256	0.104676
SPAC13G6.14	aps1	diadenosine 5',5'''-p1,p6-hexaphosphate hydrolase Aps1	0.442948	0.104917
SPAC20G8.03	itr2	MFS myo-inositol transporter	0.442876	0.104974
SPAC17H9.08	0	mitochondrial coenzyme A transporter	0.441808	0.105814
SPAC56F8.02	0	AMP binding enzyme	0.441808	0.105815
SPAC26H5.12	rpo41	mitochondrial DNA-directed RNA polymerase	0.441517	0.106045
SPAC17A5.16	0	conserved hypothetical: human down-regulated in multiple cancers-1 homolog 3	0.441262	0.106247
SPAC26F1.14c	aif1	apoptosis-inducing factor homolog Aif1	0.440601	0.106771
SPAC23C11.11	cka1	cell polarity: serine/threonine protein kinase Cka1	0.440284	0.107024
SPCC622.11	0	conserved hypothetical: LMBR1-like membrane protein	0.439893	0.107335
SPAC1399.02	0	membrane transporter	0.439841	0.107377
SPBC1105.10	rav1	late endosome to vacuole transport: RAVE complex subunit Rav1	0.439183	0.107904
SPBC20F10.03	0	conserved eukaryotic protein	0.439175	0.10791
SPBC1604.19c	0	TRAPP	0.439096	0.107974
SPBC1685.15c	klp6	microtubule movement: kinesin-like protein	0.438931	0.108106
SPCC1682.12c	ubp16	ubiquitin C-terminal hydrolase activity	0.438698	0.108293
SPAC458.03	tel2	telomere maintenance/DNA replication initiation: Tel2/Rad-5/Clk-2 family protein Tel2	0.438681	0.108307
SPBC1271.15c	0	translation initiation factor if-2	0.438655	0.108328
SPBC27B12.04c	0	conserved eukaryotic protein	0.438584	0.108385
SPAC8C9.06c	0	mitochondrial translation regulator	0.438544	0.108417
SPBP4H10.19c	0	calreticulin/calnexin homolog	0.438339	0.108582
SPBC19C7.05	0	cell wall organization protein (predicted)	0.437929	0.108913
SPCC1827.07c	0	EXS family protein	0.437839	0.108986
SPBC11C11.06c	0	sequence orphan	0.437505	0.109256
SPAC22G7.04	ubp13	ubiquitin C-terminal hydrolase, poly(A)-specific ribonuclease complex subunit Pan2 (predicted)Ê	0.436488	0.110083
SPCC576.02	0	hydantoin racemase	0.435827	0.110622
SPAC22E12.10c	etp1	ferredoxin	0.435656	0.110762
SPBC28F2.09	0	transcription factor TFIIA complex large subunit	0.434951	0.11134
SPAC23A1.19c	0	DEAD/DEAH box helicase	0.433866	0.112236
SPAC139.02c	oac1	anion transporter	0.433007	0.112948
SPBC32F12.01c	0	sphingomyelinase family	0.432594	0.113292
SPAC630.14c	tup12	transcriptional corepressor Tup12	0.431827	0.113932
SPBP4H10.14c	0	sequence orphan (cell tip/septum localization)	0.431453	0.114246
SPCC417.02	dad5	DASH complex subunit Dad5	0.431047	0.114587
SPAC9.08c	0	steroid reductase	0.430794	0.1148
SPCC1795.10c	0	DUF396	0.430585	0.114976
SPAC144.14	klp8	microtubule movement: kinesin-like protein	0.429684	0.115738
SPAC1B3.15c	0	membrane transporter	0.429515	0.115881
SPBC17A3.04c	0	methionine-tRNA ligase	0.429481	0.11591
SPAC688.08	srb8	mediator complex submodule	0.428927	0.116381
SPCC18B5.08c	0	isoleucine-tRNA ligase	0.428855	0.116442
SPAC12B10.11	exg2	fungal cell wall: glucan 1,3-beta-glucosidase	0.428404	0.116827
SPAC13G6.07c	rps601	40S ribosomal protein S6	0.426819	0.118186
SPAC25A8.02	0	sequence orphanÊÊ Ê	0.426697	0.118292
SPBC16C6.02c	vps1302	late endosome to vacuole transport: chorein homolog	0.42612	0.11879
SPCC736.08	cbf11	regulator of cell separation/cytokinesis: CBF1/Su(H)/LAG-1 family transcription factor Cbf11	0.425075	0.119697
SPBC1271.14	0	amino acid/arginine biosynthesis: glutamate N-acetyltransferase	0.425043	0.119725
SPBC36.11	0	sequence orphan (cell tip/septum localization)	0.425024	0.119741
SPAC607.10	spo3	sporulation protein Spo3	0.424945	0.119811
SPAC1F3.02c	mkh1	MEK kinase	0.424838	0.119904
SPAC824.02	0	GPI inositol deacylase	0.424656	0.120062
SPBC19C7.02	ubr1	ubiquitin-protein ligase	0.424587	0.120123
SPBC14F5.07	0	ER-localized ubiquitin ligase Teb4	0.424083	0.120563
SPBC530.04	mod5	cell polarity: Tea1 anchoring protein Mod5	0.424021	0.120617
SPBC21B10.07	0	fungal cell wall: glycosyl hydrolase family 16	0.423922	0.120704
SPBP8B7.24c	atg8	autophagy associated protein Atg8	0.423618	0.12097
SPBC13G1.10c	0	DEAD/DEAH box helicase	0.42351	0.121065
SPBC18H10.13	rps1402	40S ribosomal protein S14	0.423469	0.121102
SPBC27B12.13	tom40	mitochondrial TOM complex subunit Tom40	0.423042	0.121476
SPAC4H3.02c	swc3	Swr1 complex subunit	0.42277	0.121716
SPAC13C5.06c	mug121	sequence orphan (ER/Golgi protein)	0.421812	0.122563
SPCC1902.01	gaf1	transcription factor Gaf1	0.421694	0.122668
SPBC543.07	pek1	MAP kinase kinase Pek1	0.420894	0.123379
SPCC895.07	alp14	mitotic spindle checkpoint: Mad2-dependent spindle checkpoint component	0.420642	0.123605
SPCC1393.02c	0	DNA binding protein	0.420522	0.123711
SPBC17D11.07c	rpn2	19S proteasome regulatory subunit	0.420459	0.123768
SPACUNK4.08	0	dipeptidyl aminopeptidase	0.419794	0.124362
SPBP4H10.11c	0	long-chain-fatty-acid-CoA ligase	0.419335	0.124775
SPAPYUK71.03c	0	C2 domain	0.41812	0.125871
SPCC576.15c	ksg1	phosphoinositide-dependent kinase 1 family	0.41811	0.12588
SPBC660.07	ntp1	oxidative stress response: alpha,alpha-trehalase Ntp1	0.418023	0.125959
SPBC30B4.05	kap109	karyopherin	0.417871	0.126097
SPBC428.08c	clr4	RNA interference/centromere silencing: histone H3 methyltransferase Clr4	0.41785	0.126116
SPCC757.09c	rnc1	RNA-binding protein that supresses calcineurin deletion Rnc1	0.417709	0.126244
SPBC800.11	0	inosine-uridine preferring nucleoside hydrolase	0.417664	0.126284
SPAC22H10.03c	kap114	karyopherin	0.417552	0.126386
SPAC1687.09	0	ENTH/VHS domain protein (predicted): phosphoinositide-mediated signaling; calcium bindingÊÊ	0.417458	0.126472
SPACUNK4.16c	0	alpha,alpha-trehalose-phosphate synthase	0.417342	0.126577
SPBC646.03	0	glutamyl-tRNA amidotransferase	0.417139	0.126762
SPBC2F12.03c	0	telomere maintenance: EST1 family proteinÊÊ Ê	0.417108	0.12679
SPBC26H8.07c	nda3	microtubule movement/cell polarity: tubulin beta	0.41652	0.127326
SPAC6G9.12	cfr1	BRCT domain	0.416149	0.127665
SPBPB2B2.14c	0	DUF999	0.41585	0.127939
SPAC222.13c	0	6-phosphofructo-2-kinase	0.415787	0.127997
SPBC119.10	0	asparagine synthetase	0.415719	0.128059
SPBC19G7.05c	bgs1	fungal cell wall: 1,3-beta-glucan synthase catalytic subunit Bgs1	0.415505	0.128256
SPBC6B1.08c	ofd1	2 OG-Fe	0.415226	0.128512
SPAC17C9.07	alg8	glucosyltransferase Alg8	0.414524	0.129159
SPBC18A7.01	0	X-Pro dipeptidase	0.414421	0.129254
SPCC1450.02	0	bromodomain protein	0.414046	0.129601
SPBC1347.06c	cki1	serine/threonine protein kinase Cki1	0.413839	0.129793
SPBC1604.02c	0	sequence orphan	0.413715	0.129908
SPAPB1A10.08	0	sequence orphanÊÊ Ê	0.413371	0.130228
SPAC9E9.12c	0	ABC transporter family	0.413175	0.13041
SPAC9.10	0	amino acid permease family	0.413041	0.130535
SPBC21C3.08c	0	ornithine aminotransferase	0.412879	0.130685
SPAC9.03c	brr2	mRNA splicing: snRNP U5 complex subunit Brr2	0.412863	0.1307
SPBP4H10.17c	0	mitochondrial ribosomal small subunit	0.412818	0.130742
SPCC645.05c	myo2	myosin II heavy chain	0.412785	0.130773
SPBC1773.12	0	transcription factor	0.412721	0.130833
SPBC354.02c	sec61	translocon alpha subunit Sec61	0.412244	0.131278
SPBC776.03	0	amino acid/isoleucine synthesis: homoserine dehydrogenase	0.412208	0.131312
SPBC32F12.09	rum1	DNA replication initiation: CDK inhibitor Rum1	0.411923	0.131578
SPBC337.08c	ubi4	ubiquitin	0.411517	0.131959
SPAC1527.01	mok11	alpha-1,3-glucan synthase	0.411172	0.132284
SPAC1952.09c	0	fatty acid biosynthesis: acetyl-CoA hydrolase	0.410426	0.132987
SPBC106.13	0	cytoskeletal conserved protein; negative regulator of gluconeogenesisÊÊ Ê	0.410412	0.133
SPCC4G3.09c	gyp3	GTPase activating protein	0.410138	0.13326
SPAC630.04c	0	sequence orphan	0.409773	0.133605
SPBC32F12.10	0	phosphoglucomutase	0.409748	0.133629
SPCC1020.07	0	haloacid dehalogenase-like hydrolase	0.409498	0.133867
SPBC1861.03	mak10	NatC N-acetyltransferase complex subunit Mak10	0.409423	0.133937
SPAC23A1.14c	0	cystathionine gamma-synthase	0.40906	0.134282
SPBC25H2.13c	cdc20	DNA replication initiation: DNA polymerase epsilon catalytic subunit a Pol2	0.408694	0.134631
SPBC3D6.10	apn2	oxidative stress response: AP-endonuclease Apn2	0.408492	0.134824
SPCC576.19c	0	dubious ORF	0.40823	0.135075
SPAC22A12.17c	0	short chain dehydrogenase	0.408109	0.13519
SPAC110.04c	pss1	heat shock protein 70 family	0.408059	0.135238
SPAC4A8.02c	0	conserved hypothetical	0.407396	0.135874
SPBC947.12	kms2	coiled-coil	0.407069	0.136188
SPBC16A3.03c	lyn1	sequence orphan	0.406931	0.136321
SPAC1805.15c	pub2	ubiquitin-protein ligase	0.405806	0.137408
SPBC1773.08c	0	mannosyltransferase complex subunit	0.405689	0.137521
SPCC1322.04	0	UTP-glucose-1-phosphate uridylyltransferase	0.40512	0.138073
SPBP8B7.19	0	DNA replication: FACT complex component	0.404852	0.138334
SPBC1271.03c	0	phosphoprotein phosphatase	0.403905	0.139259
SPAC17H9.19c	cdt2	DNA replication initiation: WD repeat protein Cdt2	0.40345	0.139705
SPAC1527.03	0	RNA-binding protein: translation	0.403111	0.140037
SPCC1259.13	chk1	chk1 protein kinase	0.403079	0.14007
SPCC188.08c	ubp22	ubiquitin C-terminal hydrolase activity	0.402903	0.140243
SPAC23H3.04	0	conserved fungal proteinÊÊ Ê	0.402819	0.140325
SPCC970.09	sec8	exocyst complex subunit Sec8	0.40246	0.140679
SPBC1778.10c	ppk21	serine/threonine protein kinase Ppk21	0.40135	0.141777
SPCC1739.10	mug33	conserved fungal protein	0.401081	0.142044
SPAC9E9.15	0	conserved hypothetical: CIA30 family proteinÊÊ Ê	0.400587	0.142536
SPAC22A12.11	dak1	dihydroxyacetone kinase Dak1	0.400568	0.142555
SPBC1198.07c	0	mannan endo-1,6-alpha-mannosidase	0.399935	0.143187
SPBC31F10.14c	hip3	centromere silencing: TPR repeat protein	0.399658	0.143464
SPAC823.07	0	phospholipid biosynthesis: Per1 family	0.399576	0.143547
SPAC23G3.08c	ubp7	ubiquitin C-terminal hydrolase activity	0.399544	0.143579
SPAC13F5.05	0	redox homeostasis: thioredoxin family	0.399534	0.143589
SPCC1840.02c	bgs4	1,3-beta-glucan biosynthesis: 1,3-beta-glucan synthase subunit Bgs4	0.399148	0.143976
SPAC20H4.11c	rho5	Rho family GTPase Rho5	0.398297	0.144833
SPAC13A11.05	0	peptidase family M17	0.398229	0.144901
SPAP7G5.04c	lys1	aminoadipate-semialdehyde dehydrogenase	0.397857	0.145278
SPBC1734.10c	0	mRNA processing protein	0.397853	0.145281
SPCC965.07c	gst2	oxidative stress response: glutathione S-transferase	0.397455	0.145684
SPBP8B7.04	0	sequence orphan	0.397205	0.145937
SPAC1556.04c	pcd1	cytidine deaminase Pcd1	0.397083	0.146062
SPBC1734.06	rhp18	RAD18 homolog Rhp18	0.396379	0.146778
SPBC19G7.10c	0	topoisomerase associated protein	0.396345	0.146812
SPAC1786.03	cut11	spindle pole body docking protein Cut11	0.396295	0.146863
SPCC622.19	jmj4	jmjC domain	0.395882	0.147285
SPBC16A3.18	cip1	oxidative stress response: RNA-binding protein Cip1: regulation of mRNA stability involved in response to stress	0.395805	0.147363
SPBC19C2.10	0	src	0.395676	0.147496
SPCC757.02c	0	conserved hypothetical: epimarase (predicted)	0.395489	0.147687
SPCPJ732.02c	0	xylulose kinase	0.395435	0.147742
SPAC13G7.05	0	acyl-coA-sterol acyltransferase	0.394875	0.148316
SPAC139.05	0	succinate-semialdehyde dehydrogenase	0.394856	0.148336
SPBC2G5.05	0	vitamin metabolism: transketolase	0.394638	0.148561
SPCC16C4.09	sts5	cell polarity: RNB-like protein	0.394551	0.148649
SPBC30D10.03c	0	IMP 5'-nucleotidase	0.39448	0.148723
SPBC12C2.09c	0	ADIPOR family	0.394218	0.148993
SPAC3F10.13	ucp6	UBA domain protein	0.393707	0.149521
SPBC21D10.06c	map4	glycoprotein	0.393268	0.149975
SPAC1296.03c	sxa2	serine carboxypeptidase	0.392981	0.150272
SPAC31A2.14	0	WD repeat protein	0.392976	0.150277
SPBC3H7.15	hhp1	serine/threonine protein kinase Hhp1	0.392776	0.150485
SPBP22H7.05c	0	TAT-binding protein homolog	0.392589	0.15068
SPBC577.14c	spa1	ornithine decarboxylase antizyme Spa1	0.392468	0.150806
SPBC776.05	0	membrane transporter	0.392191	0.151094
SPAC144.17c	0	6-phosphofructo-2-kinase	0.391782	0.15152
SPBC24C6.08c	0	vesicle coat protein	0.391651	0.151657
SPBC19G7.08c	0	arrestin family	0.391192	0.152138
SPBC17F3.02	nak1	regulator of cell separation/cytokinesis/cell polarity: PAK-related kinase Nak1	0.391058	0.152278
SPAC1142.03c	swi2	Swi5-complex	0.390726	0.152627
SPAC23H4.14	vam6	HOPS complex subunit Vam6	0.390336	0.153036
SPAC22H10.07	scd2	cell polarity: Ras1p-Scd1p-Scd2p-Cdc42p-Shk1p complex	0.390032	0.153357
SPBC56F2.11	met6	homoserine O-acetyltransferase	0.388391	0.155093
SPAC3A11.06	mvp1	PX domain protein: vacuolar trafficking	0.388004	0.155505
SPAC16E8.07c	vph1	V-type ATPase	0.387829	0.155692
SPBPJ4664.05	0	conserved yeast protein	0.387762	0.155763
SPCC1020.06c	tal1	vitamin metabolism: transaldolase	0.387287	0.15627
SPBC1685.06	cid11	nucleotidyltransferase	0.387119	0.15645
SPBC19F5.01c	puc1	cyclin	0.386796	0.156796
SPAC15A10.09c	0	sequence orphan	0.386775	0.156819
SPBC25B2.07c	0	microtubule-associated protein	0.386591	0.157016
SPAC222.12c	atp2	F1-ATPase beta subunit	0.385923	0.157734
SPBC27B12.12c	0	metal ion transporter	0.385486	0.158204
SPBP23A10.09	psf1	DNA replication initiation: GINS complex subunit Psf1	0.384864	0.158877
SPBC1706.01	tea4	cell polarity: tip elongation aberrant protein Tea4	0.384545	0.159222
SPAC144.18	0	nucleotide sugar transporter	0.383595	0.160255
SPBC106.08c	mug2	cell surface glycoprotein (predicted), DUF1773 family protein 1	0.383431	0.160434
SPBPJ4664.06	gpt1	UDP-glucose-glycoprotein glucosyltransferase Gpt1	0.383376	0.160494
SPAC2F3.01	0	mannosyltransferase complex subunit	0.38335	0.160522
SPAC144.15c	cog1	Golgi retrograde transport complex subunit	0.383286	0.160593
SPAC6G9.06c	pcp1	pericentrin homolog Pcp1	0.383263	0.160618
SPAC27F1.10	0	sequence orphanÊÊ Ê	0.383022	0.160881
SPAC1556.02c	sdh1	aerobic respiration: succinate dehydrogenase Sdh1	0.382932	0.160979
SPCC622.02	0	dubious ORF	0.382825	0.161096
SPCC1442.15c	cox18	mitochondrial inner membrane protein Cox18	0.382169	0.161814
SPAPB1A10.05	0	sequence orphanÊÊ Ê	0.381743	0.162283
SPAC3G6.07	0	dubious ORF	0.381723	0.162305
SPBP19A11.02c	0	glycoprotein	0.381445	0.162611
SPCC417.08	tef3	translation elongation factor 3	0.381444	0.162612
SPAC1250.01	snf21	bromodomain protein	0.381225	0.162854
SPAC29A4.11	rga3	GTPase activating protein	0.380539	0.163611
SPAC2C4.07c	0	ribonuclease II	0.38006	0.164143
SPAC8C9.09c	mug129	sequence orphan:meiosis function	0.378637	0.165728
SPAC16E8.02	0	conserved hypothetical: DUF962 family protein	0.377722	0.166752
SPBC4C3.05c	nuc1	DNA-directed RNA polymerase I complex large subunit Nuc1	0.377579	0.166913
SPAC15E1.10	0	conserved hypothetical: PI31 proteasome regulator	0.377536	0.166961
SPBC20F10.10	0	cyclin	0.377483	0.16702
SPCC31H12.06	0	sequence orphan	0.377348	0.167173
SPBC1711.17	prp16	mRNA splicing: ATP-dependent RNA helicase	0.377216	0.167321
SPBC12C2.02c	ste20	HR1 repeat	0.377138	0.167409
SPCC16C4.03	pin1	peptidyl-prolyl cis-trans isomerase Pin1	0.376622	0.16799
SPBC20F10.07	0	conserved hypothetical: GRAM domain protein	0.376229	0.168435
SPAC19A8.02	0	pleckstrin homology domain	0.376036	0.168654
SPAC2E12.02	hsf1	transcription factor Hsf1	0.375915	0.168791
SPAC17H9.01	cid16	nucleotidyltransferase	0.375803	0.168917
SPCC1795.11	sum3	DNA replication initiation: ATP-dependent RNA helicase Sum3	0.375768	0.168957
SPAC14C4.07	0	membrane transporter	0.375691	0.169044
SPBPB2B2.18	0	sequence orphan	0.375436	0.169334
SPAC13G6.12c	chs1	chitin synthase I	0.375418	0.169354
SPBC902.06	mto2	MT organizer Mto2	0.37535	0.169431
SPAC824.08	gda1	guanosine-diphosphatase Gda1	0.37499	0.169841
SPBC29A3.13	pdp1	PWWP domain protein: histone H4-K20 methylation; DNA damage	0.374606	0.170278
SPBC1703.12	ubp9	ubiquitin C-terminal hydrolase activity	0.374373	0.170544
SPBC902.02c	ctf18	DNA replication: DNA replication factor C complex subunit Ctf18	0.373916	0.171067
SPBC1271.02	stt3	oligosaccharyltransferase subunit Stt3	0.373712	0.171301
SPBC365.02c	cox10	protoheme IX farnesyltransferase	0.373179	0.171912
SPAP27G11.12	0	conserved hypothetical: human down-regulated in multiple cancers-1 homolog 1	0.37315	0.171945
SPAC630.13c	tsc2	tuberin	0.373124	0.171975
SPBC56F2.09c	arg5	amino acid/arginine biosynthesis: carbamoyl-phosphate synthase Arg5	0.372762	0.172391
SPAC1F7.09c	0	allantoicase	0.372688	0.172476
SPAC29B12.07	sec16	multidomain vesicle coat component Sec16	0.372651	0.172519
SPAC1687.07	0	conserved fungal proteinÊÊ Ê	0.371891	0.173396
SPAC25B8.11	0	transcription factor	0.371384	0.173983
SPAC16E8.13	0	zinc finger protein	0.371236	0.174155
SPAC821.03c	0	sequence orphan	0.37068	0.174801
SPAC19G12.15c	tpp1	trehalose-6-phosphate phosphatase Tpp1	0.370615	0.174876
SPCC1020.13c	0	phospholipase	0.370502	0.175008
SPAC4G9.15	0	fatty acid biosynthesis: ketoreductase	0.370307	0.175234
SPBC543.05c	0	inorganic anion exchanger	0.370071	0.17551
SPAC2E1P3.01	0	zinc binding dehydrogenase	0.369519	0.176155
SPAC4A8.10	0	lipase	0.368911	0.176867
SPBC17D11.02c	0	synoviolin	0.368841	0.17695
SPAC26A3.04	rpl2002	60S ribosomal protein L20	0.36808	0.177845
SPBC146.13c	myo1	actin cortical patch/cell polarity: myosin type I	0.367961	0.177985
SPCP31B10.04	0	conserved fungal proteinÊÊ Ê	0.367543	0.178478
SPAC631.02	0	bromodomain protein	0.367183	0.178904
SPAC630.09c	mug58	glycerate kinase (predicted)	0.367129	0.178968
SPCC550.04c	gpi2	phospholipid biosynthesis: pig-C	0.367061	0.179048
SPAC23H3.11c	0	glucosidase	0.367022	0.179095
SPAP7G5.05	rpl1002	60S ribosomal protein L10	0.36698	0.179144
SPCC663.15c	0	conserved fungal protein: phosphoinositol bindingÊÊ Ê	0.366705	0.17947
SPAC26F1.13c	0	leucine-tRNA ligase	0.366466	0.179753
SPBC1289.13c	0	alpha-1,2-galactosyltransferase	0.36631	0.179939
SPCC320.14	0	threo-3-hydroxyaspartate ammonia-lyase	0.366256	0.180003
SPBC887.09c	0	leucine-rich repeat protein	0.366129	0.180154
SPCC622.10c	0	exocyst complex subunit Sec5	0.365893	0.180435
SPAC22A12.09c	sap114	mRNA splicing: complexed with Cdc5	0.365186	0.181279
SPAC16E8.09	scd1	cell polarity/conjugation: RhoGEF Scd1	0.365152	0.18132
SPBC211.02c	cwf3	mRNA splicing: complexed with Cdc5 protein	0.365114	0.181365
SPAC2F7.16c	0	phospholipase D	0.364979	0.181526
SPAC8F11.08c	0	esterase/lipase	0.364668	0.181899
SPBC17G9.10	rpl1102	60S ribosomal protein L11	0.364489	0.182113
SPAC664.14	amt2	Amt ammonium transporter	0.364316	0.18232
SPBC1215.01	shy1	aerobic respiration: SURF-family protein Shy1	0.364267	0.182379
SPCC330.01c	rhp16	DEAD/DEAH box helicase	0.364189	0.182473
SPCC24B10.02c	0	vitamin metabolism: NAD/NADH kinase	0.363579	0.183207
SPCC61.02	spt3	histone acetyltransferase complex subunit Spt3	0.362735	0.184226
SPAP8A3.07c	0	phospho-2-dehydro-3-deoxyheptonate aldolase	0.362504	0.184505
SPBC1E8.05	0	glycoprotein	0.362365	0.184673
SPAC1834.08	mak1	histidine kinase Mak1	0.36212	0.184971
SPAC1952.13	ned1	phospholipid biosynthesis: lipin	0.362117	0.184974
SPBC17G9.04c	nup85	nucleoporin	0.361994	0.185123
SPAC4H3.08	0	short chain dehydrogenase	0.361855	0.185292
SPAC343.19	0	phosphatidylinositol 4-kinase Lsb6	0.361746	0.185425
SPBC106.04	ada1	adenosine deaminase Ada1	0.361654	0.185537
SPAC1F7.11c	0	transcription factor	0.360958	0.186385
SPCC290.03c	nup186	nucleoporin	0.360829	0.186542
SPAC19B12.13	cox1102	cytochrome c oxidase assembly protein Cox11	0.36072	0.186675
SPBC4.04c	mcm2	DNA replication initiation: MCM complex subunit Mcm2	0.360168	0.18735
SPAC19B12.03	bgs3	1,3-beta-glucan biosynthesis: 1,3-beta-glucan synthase subunit Bgs3	0.359804	0.187796
SPAC17A2.06c	vps8	late endosome to vacuole transport: WD repeat protein Vps8	0.359561	0.188094
SPAC23D3.10c	eng2	endo-1,3-beta-glucanase Eng2	0.357559	0.190565
SPCC584.05	sec1	sec1 family	0.357474	0.190671
SPAC19B12.08	0	peptidase family C54	0.356728	0.191598
SPBC16A3.10	0	phospholipid biosynthesis: membrane bound O-acyltransferase	0.3567	0.191633
SPBC1652.02	aap1	APC amino acid transporter	0.356661	0.191681
SPCC23B6.04c	0	CRAL/TRIO domain	0.356541	0.191831
SPCC736.14	dis1	microtubule-associated protein Dis1	0.356196	0.192261
SPBC216.03	0	conserved fungal proteinÊÊ Ê	0.356113	0.192365
SPAC24B11.10c	0	chitin synthase regulatory factor Chr3	0.355958	0.192558
SPBC3B9.16c	nup120	nucleoporin	0.355714	0.192863
SPAC4C5.03	0	conserved hypothetical: CTNS domain protein (SMART)	0.355357	0.19331
SPAC6B12.13	0	protein phosphatase inhibitor	0.353849	0.195206
SPAC22H12.05c	0	fasciclin domain protein	0.3536	0.195521
SPAC1805.12c	uep1	ribosomal-ubiquitin fusion protein	0.353513	0.195631
SPAC823.16c	mug179	phosphatidylinositol 3,5-bisphosphate binding protein	0.353045	0.196223
SPBC16H5.11c	skb1	cell polarity: arginine N-methyltransferase	0.353035	0.196236
SPBC29A3.01	0	heavy metal ATPase	0.352375	0.197074
SPAC3H1.02c	0	metallopeptidase	0.352291	0.197181
SPBC13E7.11	0	rhomboid family protease	0.351914	0.19766
SPBC4F6.05c	0	lectin	0.351797	0.19781
SPAC4D7.10c	0	histone acetyltransferase SAGA complex subunit	0.351671	0.19797
SPAC57A7.11	mip1	WD repeat protein Mip1	0.351576	0.198091
SPAC25G10.09c	pan1	actin cortical patch: component, with EF hand and WH2 motif Panl (predicted)	0.351554	0.19812
SPCC576.17c	0	MFS family membrane transporter	0.351511	0.198175
SPBC1773.06c	0	alcohol dehydrogenase	0.351287	0.19846
SPAC2E1P5.02c	0	sequence orphan	0.349732	0.200454
SPBC582.03	cdc13	cyclin	0.349459	0.200805
SPAC31G5.10	eta2	Myb family	0.349284	0.201032
SPBC27B12.08	sip1	Pof6 interacting protein: endocytosis	0.349046	0.201338
SPBC32F12.07c	0	zinc finger protein	0.34787	0.202861
SPAC11D3.15	0	oxoprolinase	0.347845	0.202894
SPCC191.02c	0	acetyl-CoA ligase	0.347516	0.203321
SPAC959.05c	0	redox homeostasis: protein disulfide isomerase	0.346817	0.204232
SPAC1F12.07	0	phosphoserine aminotransferase	0.346742	0.204329
SPBC4.02c	0	conserved fungal proteinÊÊ Ê	0.346352	0.204839
SPBC20F10.08c	0	conserved eukaryotic protein	0.346329	0.204869
SPAC26A3.07c	rpl1101	60S ribosomal protein L11	0.346198	0.205041
SPBP8B7.26	0	sequence orphan (cell tip/septum localization)	0.345928	0.205393
SPAC23C11.16	plo1	Polo kinase Plo1	0.345666	0.205737
SPBC16C6.08c	qcr6	ubiquinol-cytochrome-c reductase complex subunit 8	0.345517	0.205932
SPAC1F5.04c	cdc12	formin Cdc12	0.345477	0.205985
SPAC6G9.14	0	RNA-binding PUMILIO protein: deadenylation-dependent decay; meiotic role	0.345385	0.206106
SPAC1F5.07c	hem14	protoporphyrinogen oxidase	0.345146	0.20642
SPAC4G8.05	ppk14	serine/threonine protein kinase	0.345106	0.206473
SPAC15A10.11	ubr11	ubiquitin-protein ligase	0.344767	0.206919
SPAC890.06	0	nucleoporin	0.344345	0.207475
SPBC776.13	cnd1	condensin subunit Cnd1	0.344269	0.207575
SPBC1348.07	0	DUF999	0.34417	0.207706
SPBC1271.01c	pof13	F-box protein	0.344109	0.207786
SPAC17A5.14	exo2	rRNA processing: exonuclease II	0.344033	0.207886
SPCC16C4.14c	sfc4	transcription factor TFIIIC complex subunit Sfc4	0.343777	0.208225
SPAC23E2.01	fep1	iron ion homeostasis: iron-sensing transcriptional regulator	0.343567	0.208503
SPAC2F3.15	lsk1	latrunculin sensitive kinase Lsk1	0.343549	0.208527
SPCC1682.08c	mcp2	RNA-binding protein Mcp2: meiosis	0.343521	0.208564
SPBC21B10.10	rps402	40S ribosomal protein S4	0.343474	0.208626
SPBC1709.16c	0	aromatic ring-opening dioxygenase (predicted)	0.343449	0.208659
SPBC11G11.07	0	karyopherin	0.343344	0.208798
SPAC1565.02c	0	GTPase activating protein	0.342827	0.209485
SPBC947.01	sur2	AAA family ATPase	0.342368	0.210095
SPCC1620.08	0	aerobic respiration: succinate-CoA ligase	0.341928	0.210683
SPAC1F3.05	0	VHS domain	0.34167	0.211026
SPAC25G10.03	zip1	transcription factor Zip1	0.34144	0.211334
SPCC1322.06	kap113	mitotic spindle checkpoint: karyopherin	0.341406	0.21138
SPAC694.02	0	DEAD/DEAH box helicase	0.341387	0.211404
SPAC1D4.03c	0	SAND family protein	0.341159	0.21171
SPAC31G5.15	0	phospholipid biosynthesis: phosphatidylserine decarboxylase	0.340679	0.212353
SPAC3H5.05c	rps1401	40S ribosomal protein S14	0.340216	0.212975
SPAC18G6.10	0	chromosome segregation protein	0.340167	0.213041
SPAC821.07c	moc3	transcription factor Moc3	0.340063	0.213182
SPAC1805.01c	ppk6	serine/threonine protein kinase	0.339644	0.213746
SPBC1734.04	0	alpha-1,6-mannosyltransferase complex subunit	0.339624	0.213772
SPCC4G3.03	0	WD repeat protein	0.339489	0.213954
SPBC3D6.03c	0	tRNA endonuclease	0.339352	0.214139
SPAC27E2.09	mak2	oxidative stress response: histidine kinase Mak2	0.339331	0.214168
SPAC4G9.03	adk1	adenylate kinase Adk1	0.339291	0.214222
SPAPB2B4.06	0	conserved fungal protein	0.339102	0.214477
SPAC56E4.04c	cut6	fatty acid biosynthesis: acetyl-CoA carboxylase	0.338669	0.215063
SPCP25A2.02c	rhp26	SNF2 family	0.33841	0.215414
SPCPB16A4.02c	0	conserved fungal proteinÊÊ Ê	0.338175	0.215733
SPAPB1E7.07	0	glutamate synthase	0.337993	0.21598
SPBP19A11.04c	mor2	cell polarity: HEAT repeat morphogenesis protein Mor2	0.337523	0.216619
SPBC26H8.04c	0	DEP domain	0.337491	0.216663
SPAC22H10.11c	0	TOR signaling pathway transcriptional corepressor Crf1 (predicted)	0.337392	0.216798
SPBC530.10c	anc1	adenine nucleotide carrier Anc1	0.337341	0.216867
SPBC25H2.02	ths1	threonine-tRNA ligase	0.337262	0.216974
SPAC57A10.12c	ura3	dihydroorotate dehydrogenase Ura3	0.337188	0.217076
SPAC5H10.04	0	NADPH dehydrogenase	0.336457	0.218074
SPAC56F8.08	mud1	UBA domain protein	0.336306	0.218281
SPBC1709.08	cft1	mRNA polyadenylation: cleavage factor one Cft1	0.336271	0.218329
SPBC3F6.05	rga1	GTPase activating protein	0.335972	0.218738
SPAC1F12.10c	0	cytochrome b5 family	0.335236	0.219748
SPCC584.16c	0	sequence orphan	0.335181	0.219825
SPAC3H1.05	0	CAAX prenyl protease	0.334865	0.22026
SPAC890.08	rpl31	60S ribosomal protein L31	0.334255	0.221101
SPBC17F3.01c	rga5	1,3-beta-glucan biosynthesis: GTPase activating protein	0.334198	0.221181
SPAC19A8.12	dcp2	mRNA decapping complex subunit Dcp2	0.334182	0.221202
SPBC428.03c	pho4	thiamine-repressible acid phosphatase Pho4	0.333933	0.221547
SPAC31F12.01	zds1	zds family protein Zds1	0.33334	0.222368
SPBC17D1.01	0	transcriptional regulatory protein Spp41ÊÊ Ê	0.333062	0.222754
SPAC22A12.04c	rps2201	40S ribosomal protein S15a	0.333007	0.22283
SPBC106.10	pka1	cAMP-dependent protein kinase catalytic subunit Pka1	0.332929	0.222939
SPCC1620.06c	0	ribose-phosphate pyrophosphokinase	0.332656	0.223317
SPAC1093.04c	0	tRNA nucleotidyltransferase	0.332459	0.223592
SPAC652.01	0	conserved hypothetical: BC10 family protein	0.332204	0.223948
SPBC6B1.07	prp1	mRNA splicing: U4/U6 x U5 tri-snRNP complex subunit	0.332105	0.224085
SPBC365.14c	0	UDP-glucose 4-epimerase	0.331774	0.224548
SPBC16C6.04	0	sequence orphan	0.33169	0.224666
SPAC1687.08	0	sequence orphan	0.3316	0.22479
SPBC17A3.10	pas4	zinc finger protein	0.331151	0.225419
SPAC222.10c	byr4	two-component GAP for GTPase spg1	0.331092	0.225502
SPCC14G10.02	0	ribosome biogenesis protein Urb1 (predicted)ÊÊ Ê	0.330862	0.225825
SPCC830.04c	mug128	sequence orphan	0.330749	0.225983
SPBC17G9.13c	0	conserved fungal mitochondrial proteinÊÊ Ê	0.330666	0.226099
SPAC20H4.09	0	mRNA splicing: DEAD/DEAH box helicase	0.330028	0.226996
SPBC29A3.17	gef3	RhoGEF Gef3	0.329724	0.227425
SPCC16A11.15c	0	sequence orphan	0.32928	0.228052
SPBC557.04	ppk29	actin cortical patch: Ark1/Prk1 family protein kinase Ppk29	0.32839	0.22931
SPAC17D4.03c	cis4	zinc ion homeostasis: metal transporter	0.328289	0.229453
SPAC823.03	ppk15	serine/threonine protein kinase Ppk15	0.328173	0.229619
SPBC1734.16c	pst3	SIN3 family co-repressor	0.327663	0.230343
SPBC1289.04c	pob1	cell polarity: Boi family protein	0.327414	0.230698
SPAC1093.01	0	conserved hypothetical (PPR repeat protein)	0.326066	0.232623
SPBC146.14c	sec26	coatomer beta subunit	0.325969	0.232762
SPCC188.13c	dcr1	RNA interference/centromere silencing: dicer	0.324763	0.234496
SPBC18H10.02	lcf1	long-chain-fatty-acid-CoA ligase Lcf1	0.324729	0.234544
SPBC119.17	0	peptidase family M16	0.324468	0.23492
SPCC126.07c	0	zinc finger protein	0.324349	0.235091
SPBC530.14c	dsk1	mRNA splicing: SR protein-specific kinase Dsk1	0.324314	0.235143
SPAC3G6.09c	tps2	trehalose-phosphate synthase Tps2	0.323731	0.235986
SPBC1703.07	0	aerobic respiration: ATP citrate synthase	0.323605	0.236167
SPAC767.01c	vps1	dynamin family	0.323307	0.236599
SPBC36.04	cys11	cysteine synthase	0.323208	0.236743
SPBC336.01	fbh1	DNA replication: DNA helicase I	0.322246	0.238141
SPAC806.04c	0	conserved hypothetical: DUF89 family proteinÊÊ Ê	0.321702	0.238934
SPAC1F5.11c	0	phosphatidylinositol kinase	0.321131	0.239769
SPBC30B4.04c	sol1	transcriptional regulator	0.321078	0.239846
SPAPB1A10.04c	cwp1	1,3-beta-glucan biosynthesis: geranylgeranyltransferase I alpha subunit Cwp1	0.320602	0.240545
SPBC16A3.07c	nrm1	negative regulator of MBFÊÊ Ê	0.320593	0.240557
SPCC1682.13	0	SWIRM domain	0.3205	0.240694
SPBC839.10	usp107	mRNA splicing: U1 snRNP-associated protein	0.320463	0.240748
SPCC736.06	0	aspartate-tRNA ligase	0.320401	0.24084
SPBC1703.15c	vps33	late endosome to vacuole transport: sec1 family	0.320307	0.240978
SPAC212.10	0	pseudogene	0.319496	0.24217
SPBC16A3.17c	0	membrane transporter	0.319252	0.242529
SPAC20G4.07c	sts1	ergosterol biosynthesis: C-24	0.319016	0.242878
SPAC1B2.05	mcm5	DNA replication initiation: MCM complex subunit Mcm5	0.318898	0.243053
SPAC1002.12c	0	succinate-semialdehyde dehydrogenase	0.318676	0.243381
SPAC21E11.08	lcb2	serine palmitoyltransferase	0.318488	0.24366
SPCC1620.12c	0	GTPase activating protein	0.317828	0.244638
SPBC530.06c	0	translation initiation factor eIF3 alpha subunit	0.317718	0.2448
SPBC18E5.15	0	pseudogeneÊ	0.317663	0.244883
SPBC577.11	0	sequence orphan	0.317417	0.245247
SPBC27.02c	ask1	DASH complex subunit Ask1	0.31723	0.245526
SPAC1039.11c	0	alpha-glucosidase	0.317117	0.245695
SPBC8D2.04	hht2	centromere silencing: histone H3	0.316835	0.246114
SPBPB21E7.09	0	L-asparaginase	0.316754	0.246235
SPAC513.06c	0	dihydrodiol dehydrogenase	0.316731	0.24627
SPBC651.05c	dot2	late endosome to vacuole transport: EAP30 family protein Dot2	0.316722	0.246284
SPBC2G5.06c	hmt2	sulfide-quinone oxidoreductase	0.316264	0.246966
SPBPB2B2.13	gal1	galactokinase	0.315692	0.247823
SPAC16E8.08	0	sequence orphan	0.315548	0.248039
SPCC970.05	rpl3601	60S ribosomal protein L36	0.31538	0.248291
SPBC1271.10c	0	membrane transporter	0.315093	0.248721
SPBC16G5.06	0	sequence orphan (ER)	0.314935	0.248958
SPAC26H5.08c	bgl2	fungal cell wall: glucan 1,3-beta-glucosidase	0.314361	0.249822
SPAC1F5.08c	yam8	calcium signaling/homeostasis: calcium transport protein	0.314297	0.249918
SPBC651.08c	rpc1	DNA-directed RNA polymerase III complex large subunit Rpc1	0.314246	0.249996
SPAC29E6.01	pof11	F-box protein	0.314166	0.250116
SPCC338.17c	rad21	kleisin	0.314055	0.250282
SPCC576.06c	0	tyrosine-tRNA ligase	0.313497	0.251125
SPAC3C7.11c	cnx1	calnexin	0.313305	0.251416
SPAC23C4.05c	0	conserved hypothetical: LEA domain proteinÊÊ Ê	0.313185	0.251598
SPCC188.07	ccq1	telomere maintenance: HEAT repeat	0.312597	0.252489
SPAC23A1.18c	mrp51	mitochondrial ribosomal protein subunit Mrp51	0.311905	0.25354
SPBC30B4.07c	tfb4	transcription factor TFIIH complex subunit Tfb4	0.311895	0.253556
SPBC23G7.13c	0	urea transporter	0.311583	0.25403
SPAC5H10.13c	gmh2	alpha-1,2-galactosyltransferase Gmh2	0.311513	0.254137
SPCC74.02c	0	mRNA cleavage and polyadenylation specificity factor complex associated protein	0.311299	0.254464
SPBPB21E7.05	0	sequence orphan	0.31111	0.254752
SPAC23G3.05c	0	cell polarity: regulator of G-protein signaling	0.31051	0.25567
SPBC146.01	med15	RNA polymerase II holoenzyme component	0.31038	0.255868
SPAC343.11c	msc1	multi-copy Suppressor of Chk1	0.310311	0.255975
SPAC4G8.13c	prz1	calcium signaling/homeostasis: transcription factor Prz1	0.310234	0.256093
SPBC16E9.14c	zrg17	zinc ion homeostasis: cation efflux family	0.310027	0.25641
SPAC20G8.02	0	phospholipase	0.309903	0.2566
SPCC330.07c	0	membrane transporter	0.309735	0.256858
SPAC977.06	0	DUF999	0.309464	0.257274
SPAC31A2.10	0	RanGTP-binding protein	0.309391	0.257387
SPAC1006.06	rgf2	RhoGEF Rgf2	0.309311	0.25751
SPBC1D7.04	mlo3	RNA annealing factor Mlo3	0.308702	0.258448
SPAC17C9.02c	lys7	alpha-aminoadipate reductase phosphopantetheinyl transferase Lys7	0.308501	0.258758
SPBC19F8.04c	0	nuclease	0.308299	0.259069
SPAC4A8.11c	fas2	fatty acid biosynthesis: fatty acid synthase alpha subunit Lsd1	0.308143	0.259312
SPAC6G10.11c	ubi3	ribosomal-ubiquitin fusion protein	0.307953	0.259604
SPBC1734.15	rsc4	bromodomain protein	0.307944	0.259619
SPCC24B10.21	tpi1	glycolysis: triosephosphate isomerase	0.307681	0.260027
SPCC70.10	0	glycoprotein	0.307677	0.260032
SPAC23D3.11	ayr1	phospholipid biosynthesis: 1-acyldihydroxyacetone phosphate reductase	0.307386	0.260482
SPCC364.03	rpl1702	60S ribosomal protein L17	0.3069	0.261237
SPAC17G8.13c	mst2	telomere maintenance: histone acetyltransferase Mst2	0.306522	0.261825
SPBC1604.12	0	sequence orphan	0.306467	0.261911
SPCC1281.08	wtf11	wtf element	0.306064	0.262539
SPAC22F8.11	plc1	phosphoinositide phospholipase C Plc1	0.306037	0.262581
SPCC63.11	prp28	mRNA splicing: DEAD/DEAH box helicase; U5 snRNP-associated protein	0.305945	0.262724
SPAC1F7.05	cdc22	ribonucleoside reductase large subunit Cdc22	0.305735	0.263052
SPBC115.02c	0	ATPase	0.304999	0.264203
SPAC3A12.03c	0	zinc finger protein	0.304668	0.264721
SPAC16C9.07	ppk5	serine/threonine protein kinase	0.304632	0.264777
SPBC609.03	0	WD repeat protein	0.304295	0.265307
SPCC11E10.09c	0	alpha-amylase	0.304205	0.265448
SPBC18E5.14c	0	sequence orphan; same as SPBC18E5.09c	0.303377	0.266752
SPCC23B6.01c	0	oxysterol binding protein	0.303354	0.266787
SPBC29A10.01	ccr1	ergosterol biosynthesis: NADPH-cytochrome p450 reductase	0.30335	0.266793
SPCC61.03	0	conserved hypothetical: UPF0031 family proteinÊÊ Ê	0.303348	0.266797
SPBC13G1.08c	ash2	Ash2-trithorax family protein	0.303026	0.267304
SPCC417.03	0	sequence orphan	0.302459	0.268201
SPAC630.03	arp3	actin cortical patch/cell polarity: actin-like protein Arp3 (predicted)	0.302423	0.268258
SPBC14C8.01c	cut2	mitotic spindle checkpoint: securin	0.302381	0.268325
SPAC6F6.01	0	VIC sodium channel	0.301893	0.269098
SPBC1685.01	pmp1	conjugation: dual-specificity MAP kinase phosphatase Pmp1	0.301802	0.269242
SPAC22H12.01c	mug35	sequence orphanÊÊ Ê	0.301668	0.269455
SPBC19G7.01c	msh2	MutS protein homolog 2	0.30148	0.269754
SPAC17G6.12	cul1	cullin 1	0.301361	0.269943
SPBC685.02	0	conserved eukaryotic protein	0.301343	0.269971
SPCC550.14	0	KH domain	0.301157	0.270266
SPAC22H10.09	0	sequence orphan	0.300787	0.270855
SPCC965.04c	0	AAA family ATPase	0.300505	0.271305
SPAC15A10.01	atm1	iron ion homeostasis: ABC family iron transporter	0.299824	0.272392
SPBC428.17c	0	sequence orphan	0.299752	0.272507
SPBC14C8.11c	0	sequence orphan	0.299316	0.273206
SPAC10F6.15	0	S. pombe specific UPF0300 family protein 1; meiosis role	0.299155	0.273463
SPBC14F5.03c	kap123	karyopherin	0.29889	0.273889
SPBC543.09	0	respiratory chain complex assembly protein	0.298261	0.274899
SPBC646.13	sds23	CBS domain protein	0.297989	0.275337
SPAC20G4.05c	0	conserved hypothetical: UPF0061 family protein	0.29771	0.275787
SPAC23C4.12	hhp2	serine/threonine protein kinase Hhp2	0.297486	0.276149
SPBC3F6.01c	0	serine/threonine protein phosphatase	0.297258	0.276518
SPBC21B10.03c	0	mRNA polyadenylation: ataxin-2 homolog	0.297172	0.276656
SPBC17G9.11c	pyr1	pyruvate carboxylase	0.297129	0.276727
SPCC1223.11	ptc2	protein phosphatase 2C Ptc2	0.29712	0.27674
SPAC1565.08	cdc48	AAA family ATPase	0.296741	0.277354
SPCC4E9.01c	rec11	meiotic cohesin complex subunit Rec11	0.296649	0.277502
SPBC1289.10c	adn2	transcription factor	0.296609	0.277567
SPBC3D6.11c	slx8	zinc finger protein	0.296543	0.277675
SPAC18G6.11c	rrn3	ribosomal DNA	0.296527	0.2777
SPBC4F6.10	vps901	guanyl-nucleotide exchange factor activity	0.296522	0.277709
SPAC25B8.07c	0	mitochondrial protein	0.29622	0.278198
SPBC3B8.11	rrn6	RNA polymerase I transcription factor subunit Rrn6 (predicted)Ê	0.295428	0.279486
SPAC14C4.11	0	polyphosphate synthetase	0.294931	0.280294
SPCC70.06	0	SAC3/GANp family	0.294614	0.280812
SPAC25H1.07	0	conserved hypothetical: DUF1620 family protein	0.294584	0.280862
SPAC30D11.05	aps3	AP-3 adaptor complex subunit Aps3	0.29438	0.281193
SPBC8D2.18c	0	adenosylhomocysteinase	0.294277	0.281363
SPAC5D6.12	0	mitochondrial translation protein (predicted)Ê	0.294261	0.281388
SPAC15A10.16	bud6	cell polarity: actin interacting protein 3 homolog Bud6	0.294118	0.281622
SPBC21C3.11	ubx4	UBX domain	0.294036	0.281757
SPCC1259.12c	0	SPRY domain	0.293959	0.281883
SPAC14C4.14	atp1	F1-ATPase alpha subunit	0.293894	0.281989
SPAC4G9.08c	rpc2	DNA-directed RNA polymerase III complex subunit Rpc2	0.293575	0.282512
SPBC21H7.05	sfc6	transcription factor TFIIIC complex	0.293415	0.282774
SPAC23G3.03	sib2	iron ion homeostasis: ornithine N5 monooxygenase	0.293391	0.282813
SPBC83.14c	rfc5	DNA replication initiation: DNA replication factor C complex subunit Rfc5	0.293358	0.282868
SPBC13E7.03c	0	post-transcriptional regulator Vts1	0.292614	0.28409
SPAC1952.12c	csn71	COP9/signalosome complex subunit 7a	0.292504	0.284271
SPAC24C9.07c	bgs2	1,3-beta-glucan biosynthesis: 1,3-beta-glucan synthase subunit Bgs2	0.291554	0.285838
SPAC631.01c	acp2	actin cortical patch: F-actin capping protein beta subunit	0.29147	0.285977
SPCC1322.05c	0	fatty acid biosynthesis: leukotriene A-4 hydrolase	0.291349	0.286177
SPAC20G8.01	cdc17	telomere maintenance: ATP-dependent DNA ligase Cdc17	0.291111	0.28657
SPAPB1A11.01	0	MFS family membrane transporter	0.290884	0.286947
SPBC1861.02	abp2	DNA replication initiation: ARS binding protein Abp2	0.290704	0.287244
SPAC18G6.05c	0	HEAT repeat	0.290618	0.287388
SPBC17G9.06c	0	siderophore-iron biosynthesis protein (predicted)	0.290595	0.287425
SPBC354.15	fap1	L-pipecolate oxidase	0.290456	0.287657
SPBC342.03	gas4	1,3-beta-glucan biosynthesis: GPI anchored protein	0.29043	0.2877
SPAC13G6.08	0	WD repeat protein	0.290205	0.288072
SPBC3B8.04c	0	membrane transporter	0.289846	0.28867
SPAPB17E12.14c	0	glycolysis: 6-phosphofructo-2-kinase	0.289775	0.288789
SPCC645.13	0	zinc finger protein	0.289286	0.289603
SPBC216.07c	tor2	G1/S transition: phosphatidylinositol kinase Tor2	0.289065	0.289971
SPCC553.04	cyp9	cyclophilin	0.288747	0.290501
SPAC22F8.02c	pvg5	fungal cell wall: PvGal biosynthesis protein Pvg5	0.28868	0.290613
SPBC2F12.09c	atf21	transcription factor Atf21	0.288237	0.291355
SPAC30C2.08	0	conserved fungal proteinÊÊ Ê	0.288086	0.291608
SPBC685.05	gpi15	phospholipid biosynthesis: pig-H	0.287679	0.29229
SPAC1687.02	0	CAAX prenyl protease	0.287446	0.292681
SPAC823.11	0	sphingosine-1-phosphate phosphatase	0.287418	0.292729
SPBC691.01	0	palmitoyltransferase	0.286863	0.293661
SPAC19G12.05	0	mitochondrial citrate transporter	0.286787	0.293789
SPAC1952.05	gcn5	histone acetyltransferase complex subunit Gcn5	0.28656	0.294171
SPBC146.09c	lsd1	oxidoreductase	0.286071	0.294996
SPCC584.13	0	amino acid permease family	0.285985	0.29514
SPBC21C3.03	0	conserved hypothetical: ABC1 kinase family protein	0.285558	0.295862
SPAC3G9.01	nsk1	sequence orphan: Clp1-interacting proteinÊÊ Ê	0.285503	0.295956
SPAC29B12.04	snz1	vitamin metabolism: pyridoxine biosynthesis protein	0.285449	0.296048
SPAC16.03c	ura2	dihydroorotase	0.285204	0.296462
SPAC2F7.11	nrd1	rrm RNA recognition motif: negative regulation of conjugation with cellular fusion	0.284756	0.297222
SPCC4B3.10c	ipk1	inositol 1,3,4,5,6-pentakisphosphate	0.284621	0.297449
SPAC806.07	ndk1	nucleoside diphosphate kinase	0.284246	0.298086
SPAC17A2.05	osm1	aerobic respiration: fumerate reductase	0.283301	0.299696
SPBC725.14	arg6	amino acid/arginine biosynthesis: acetylglutamate synthase	0.283261	0.299764
SPAC1B1.01	0	transcription factor	0.283208	0.299855
SPAC19D5.04	ptr1	HECT domain	0.283179	0.299905
SPBC428.20c	alp6	mitotic spindle checkpoint: gamma tubulin complex subunit Alp6	0.282918	0.30035
SPAC6G9.13c	bqt1	meiotically upregulated gene Mug23	0.282831	0.300499
SPAC3A11.12c	rpt5	19S proteasome regulatory subunit	0.282803	0.300546
SPAC1F3.08c	0	dubious ORF	0.282404	0.301229
SPBPB21E7.01c	eno102	glycolysis: enolase	0.281974	0.301966
SPAC19B12.10	sst2	late endosome to vacuole transport: human AMSH protein homolog	0.281586	0.302631
SPAC6F6.15	ypt5	GTPase Ypt5	0.281398	0.302953
SPAC1002.14	itt1	zinc finger protein	0.281078	0.303504
SPCC895.03c	0	telomere maintenance: SUA5/yciO/yrdC family	0.280973	0.303685
SPCC18B5.06	erf1	translation release factor eRF1	0.280961	0.303706
SPBC3H7.14	0	BRCT domain	0.280332	0.30479
SPBC12C2.08	dnm1	dynamin family	0.280142	0.305117
SPBC1709.13c	0	lysine methyltransferase	0.279924	0.305493
SPAC2E1P5.01c	mns1	mannosyl-oligosaccharide 1,2-alpha-mannosidase	0.279739	0.305814
SPBC16H5.14c	0	short chain dehydrogenase	0.279568	0.306109
SPBP23A10.06	0	mitochondrial carrier	0.27947	0.306278
SPAPB17E12.08	0	N-glycosylation protein (predicted)	0.279445	0.306321
SPBC1709.05	sks2	heat shock protein 70 family	0.279281	0.306606
SPAC6B12.02c	mus7	DNA replication: DNA repair protein Mus7/Mms22ÊÊ Ê	0.279146	0.306839
SPCC16C4.18c	taf50	histone H4-like TAF	0.278925	0.307223
SPBC1271.08c	0	sequence orphan	0.278701	0.307611
SPBC19G7.18c	0	sequence orphan (mitochondrion)	0.278701	0.307612
SPAC23C11.01	0	ER membrane protein	0.278684	0.307642
SPBC1604.07	atp4	F0-ATPase subunit	0.2786	0.307786
SPCC794.10	0	UTP-glucose-1-phosphate uridylyltransferase	0.27856	0.307856
SPAC17A2.01	bsu1	high-affinity import carrier for pyridoxine, pyridoxal, and pyridoxamine Bsu1	0.27856	0.307857
SPBC354.06	mrps16	mitochondrial ribosomal protein subunit S16	0.278553	0.307869
SPAC56F8.15	0	dubious ORF	0.278366	0.308194
SPCC24B10.22	0	DNA replication: DNA polymerase gamma catalytic subunit	0.278252	0.308392
SPBC1677.03c	0	amino acid/isoleucine synthesis: threonine ammonia-lyase	0.277954	0.30891
SPBC83.07	jmj3	Lid2 complex subunit Jmj3	0.27783	0.309125
SPBC25H2.03	0	HEAT repeat	0.277734	0.309293
SPAC1F5.02	0	redox homeostasis: thioredoxin family	0.277366	0.309935
SPAC1006.07	0	translation initiation factor eIF4A	0.277138	0.310333
SPBC3H7.13	0	FHA domain	0.277133	0.310342
SPAC23G3.02c	sib1	iron ion homeostasis: ferrichrome synthetase Sib1	0.276529	0.311396
SPAC3H8.05c	0	sequence orphan	0.276327	0.31175
SPBC11C11.03	ndc80	spindle pole body protein Ndc80	0.276188	0.311994
SPBC902.04	0	rrm RNA recognition motif	0.276102	0.312144
SPAC22E12.11c	set3	histone lysine methyltransferase Set3	0.276096	0.312156
SPAPYUG7.02c	sin1	stress activated MAP kinase interacting protein Sin1	0.275974	0.312369
SPCC1183.07	0	rRNA processing: U3 snoRNP-associated protein Rrp5	0.275911	0.31248
SPCC24B10.08c	0	histone acetyltransferase complex subunit	0.275524	0.313158
SPBC29A3.15c	rsm23	mitochondrial ribosomal protein subunit S23	0.275102	0.3139
SPBP35G2.10	mit1	centromere silencing: SHREC complex subunit	0.274974	0.314126
SPBC691.02c	0	RINT1 family protein: retrograde vesicle-mediated transport, Golgi to ER	0.274861	0.314324
SPAC823.15	ppa1	minor serine/threonine protein phosphatase Ppa1	0.274708	0.314594
SPCC553.02	0	vitamin metabolism: glutamine-dependent NAD	0.274706	0.314597
SPBC337.04	ppk27	serine/threonine protein kinase	0.274329	0.315262
SPBC16E9.17c	rem1	meiosis-specific cyclin Rem1	0.273921	0.315981
SPAC7D4.03c	0	conserved fungal familyÊÊ Ê	0.273863	0.316084
SPBC25H2.05	ucp15	nascent polypeptide-associated complex	0.273817	0.316167
SPCC126.15c	sec65	signal recognition particle subunit Sec65	0.273753	0.316279
SPAC11E3.02c	0	C2 domain	0.273392	0.316918
SPAC6C3.05	0	sequence orphanÊÊ Ê	0.27318	0.317293
SPAC26A3.05	chc1	clathrin heavy chain Chc1	0.273074	0.317481
SPCC1795.07	0	mitochondrial ribosomal protein subunit S13	0.272389	0.318696
SPBC14C8.17c	0	regulator of cell separation/cytokinesis: SAGA-like complex	0.272357	0.318754
SPAC1565.07c	0	TATA binding protein interacting protein	0.272347	0.318771
SPBC409.19c	0	metaxin	0.271956	0.319466
SPCC1739.08c	0	short chain dehydrogenase	0.271824	0.319701
SPAC1B3.11c	ypt4	GTPase	0.271495	0.320286
SPBC215.12	cwf10	mRNA splicing: GTPase Cwf10	0.271465	0.32034
SPCC965.08c	alr1	alanine racemase Alr1	0.271297	0.320639
SPCC18.07	rpc53	DNA-directed RNA polymerase III complex subunit Rpc53	0.271236	0.320749
SPCC737.05	0	pex24 family	0.271231	0.320758
SPBC18E5.04	rpl1001	60S ribosomal protein L10	0.271213	0.320791
SPAC24C9.12c	0	glycine hydroxymethyltransferase	0.271196	0.32082
SPAC2F7.02c	0	phosphoprotein phosphatase	0.271019	0.321136
SPAC29A4.18	prw1	WD repeat protein	0.270995	0.321179
SPAC2C4.16c	rps801	40S ribosomal protein	0.270858	0.321424
SPBC30B4.02c	0	mRNA splicing: R3H domain	0.27071	0.321688
SPAC1486.05	nup189	nucleoporin	0.270706	0.321695
SPAC4C5.02c	ryh1	GTPase	0.270229	0.322548
SPAC6G10.05c	0	TRAPP	0.269779	0.323355
SPCC4B3.05c	hem12	uroporphyrinogen decarboxylase	0.269115	0.324547
SPCC16C4.17	mug123	meiotically upregulated gene Mug123	0.26911	0.324557
SPBC28F2.12	rpb1	DNA-directed RNA polymerase II large subunit	0.268921	0.324896
SPBC19F8.08	rps401	40S ribosomal protein S4	0.268664	0.32536
SPAC3F10.04	gsa1	glutathione synthetase large subunit Gsa1	0.268427	0.325786
SPCC594.07c	0	sequence orphan	0.268292	0.326029
SPCC4G3.15c	not2	CCR4-Not complex subunit	0.268187	0.32622
SPBC2G2.07c	0	mitochondrial ribosomal protein	0.267905	0.326728
SPAC17H9.10c	ddb1	DNA replication initiation: damaged DNA binding protein Ddb1	0.267818	0.326884
SPBC25H2.06c	hrf1	COPII-coated vesicle component	0.267797	0.326923
SPCC11E10.06c	0	transcription elongation factor complex subunit	0.267381	0.327675
SPCC962.02c	bir1	mitotic spindle checkpoint: survivin	0.267102	0.32818
SPCC4G3.19	alp16	gamma tubulin complex	0.266912	0.328524
SPBC428.07	meu6	lysine-rich protein	0.266902	0.328541
SPCC285.13c	0	nucleoporin Nup60 (predicted)ÊÊ	0.266839	0.328656
SPCC364.02c	bis1	stress response protein Bis1	0.266586	0.329115
SPBC1539.04	0	conserved eukaryotic proteinÊÊ Ê	0.266585	0.329117
SPAC1782.12c	0	conserved hypothetical: DUF423 protein	0.266357	0.329531
SPCC70.05c	0	serine/threonine protein kinase	0.266307	0.329622
SPBC1778.03c	0	vitamin metabolism: NADH pyrophosphatase	0.265984	0.330209
SPBP19A11.07c	0	conserved hypothetical: human down-regulated in multiple cancers-1 homolog 2Ê	0.26574	0.330651
SPAC222.07c	hri2	eIF2 alpha kinase Hri2	0.265364	0.331337
SPAC23H4.02	ppk9	serine/threonine protein kinase Ppk9	0.265109	0.331802
SPAC343.07	mug28	meiotically upregulated gene Mug28	0.264773	0.332414
SPBC119.03	0	S-adenosylmethionine-dependent methyltransferase	0.263918	0.333979
SPBC216.06c	swi1	DNA replication initiation: replication fork protection complex subunit Swi1	0.263709	0.334362
SPBC17G9.03c	0	lysine-tRNA ligase	0.263552	0.334648
SPBC1E8.04	Tf2-10-pseudo	transposable element	0.263529	0.334692
SPBC6B1.06c	ubp14	ubiquitin C-terminal hydrolase activity	0.263263	0.335179
SPCC1259.01c	rps1802	40S ribosomal protein S18	0.26311	0.335459
SPAC27E2.11c	0	glycoprotein	0.263034	0.335601
SPBP23A10.13	orc4	DNA replication initiation: origin recognition complex subunit Orc4	0.26225	0.337042
SPAC1556.03	azr1	serine/threonine protein phosphatase Azr1	0.262057	0.337398
SPAC637.11	suv3	ATP-dependent RNA helicase Suv3	0.261089	0.339186
SPBC106.03	0	conserved hypothetical: DUF1776 family protein	0.261076	0.339209
SPAC8C9.04	0	sequence orphan:meiosis and sporulation function	0.260981	0.339385
SPAC6F6.16c	tpz1	telomere maintenance: Tppl homolog Tpz1: telomere capping	0.260962	0.339421
SPAC328.06	ubp2	ubiquitin C-terminal hydrolase activity	0.260666	0.339969
SPCC1795.06	map2	conjugation: P-factor	0.260491	0.340294
SPBC83.03c	tas3	centromere silencing: RITS complex subunit 3	0.260139	0.340946
SPBC3D6.13c	0	redox homeostasis: protein disulfide isomerase	0.259671	0.341816
SPAC1952.11c	ure2	urease	0.259217	0.34266
SPBP4H10.04	ppb1	cell polarity: serine/threonine protein phosphatase Ppb1	0.259014	0.343037
SPAC22G7.02	kap111	karyopherin	0.258478	0.344037
SPAC1B3.08	0	PINT/PCI domain	0.257763	0.345375
SPBC1198.09	ubc16	ubiquitin conjugating enzyme	0.257746	0.345405
SPBC947.02	apl2	adaptin	0.257745	0.345407
SPBC9B6.09c	mdl1	mitochondrial peptide-transporting ATPase	0.257682	0.345526
SPBC887.12	0	P-type ATPase	0.25762	0.345642
SPAC22A12.15c	bip1	BiP	0.257567	0.345741
SPBC1773.15	0	membrane transporter	0.257547	0.345778
SPAC630.07c	0	sequence orphan	0.257493	0.34588
SPAC2G11.11c	prh1	RNA helicase: ribosome biogenesis	0.257171	0.346483
SPAC23A1.17	0	actin cortical patch: WIP (Wiskott-Aldrich syndrome protein-Interacting Protein) homolog	0.256873	0.347042
SPBC3H7.10	0	elongator complex subunit Elp6Ê(predicted)Ê	0.256821	0.347139
SPBC1718.04	0	phospholipid biosynthesis: glycerol-3-phosphate O-acyltransferase	0.256428	0.347877
SPBC428.02c	eca39	amino acid/isoleucine synthesis: branched chain amino acid aminotransferase Eca49	0.256238	0.348236
SPAC1399.05c	0	transcription factor	0.256141	0.348418
SPBC17G9.08c	csx2	ADP-ribosylation factor	0.255699	0.34925
SPAC30D11.04c	nup124	nucleoporin Nup124	0.255496	0.349633
SPAC2E12.03c	0	G-protein coupled receptor	0.255268	0.350062
SPBC29A3.03c	0	zinc finger protein	0.25522	0.350153
SPCC962.06c	bpb1	mRNA splicing: zinc finger protein	0.254931	0.3507
SPBPJ4664.04	0	coatomer alpha subunit	0.254823	0.350904
SPBC17D11.08	0	WD repeat protein	0.253895	0.352661
SPAC56E4.03	0	aromatic aminotransferase	0.253679	0.35307
SPCC16A11.17	cdc21	DNA replication initiation: MCM complex subunit Cdc21	0.253536	0.353342
SPAC17C9.06	sam50	SAM complex subunit Sam50	0.253099	0.354172
SPAC5D6.02c	0	sequence orphan	0.252893	0.354564
SPAC12B10.01c	0	ubiquitin-protein ligase	0.252627	0.355071
SPAC29B12.02c	set2	histone lysine methyltransferase Set2	0.25239	0.355522
SPAC3H5.07	rpl702	60S ribosomal protein L7	0.252108	0.356059
SPBC25D12.02c	dnt1	nucleolar protein: chromatin silencing at rDNA; negative regulator of septation	0.251616	0.357
SPBC354.10	0	telomere maintenance: RNAPII degradation factor (predicted)Ê	0.251591	0.357047
SPCC553.11c	0	transcription factor TFIIA complex small subunit	0.251581	0.357066
SPAC2F3.10	0	GARP complex	0.251134	0.357922
SPBP23A10.16	tim18	TIM22 inner membrane complex anchor subunit Tim18	0.250706	0.358741
SPAC3F10.05c	mug113	conserved hypothetical: DUF1766 family proteinÊÊ Ê	0.250301	0.359518
SPAC2F3.08	sut1	alpha-glucoside transporter	0.25016	0.359788
SPAC23A1.02c	0	calcineurin-like phosphoesterase	0.249987	0.360121
SPCC11E10.08	rik1	centromere silencing: silencing protein Rik1	0.249891	0.360304
SPBC1709.15c	cft2	mRNA polyadenylation: cleavage factor two Cft2	0.249755	0.360567
SPBC11B10.10c	pht1	histone H2A variant	0.249729	0.360617
SPBC15D4.10c	amo1	cell polarity: nuclear rim protein Amo1	0.249378	0.361291
SPAC1296.06	0	NADPH cytochrome reductase	0.249303	0.361437
SPAC31G5.04	0	homoisocitrate dehydrogenase	0.249083	0.361859
SPAC1F7.10	0	hydantoin racemase	0.248953	0.362111
SPCC4G3.14	mdj1	DNAJ domain protein	0.24868	0.362638
SPBC947.11c	elg1	DNA replication: DNA replication factor C complex subunit Elg1	0.248604	0.362784
SPAC343.06c	0	scramblase	0.248599	0.362794
SPCC1906.02c	0	CUE domain protein Cue3 (predicted): ubiquitin	0.248247	0.363474
SPCC1682.02c	mcm3	DNA replication initiation: MCM complex subunit Mcm3	0.248237	0.363492
SPBC4B4.02c	nca2	mitochondrial protein Nca2	0.248002	0.363947
SPBC1604.21c	ptr3	ubiquitin activating enzyme	0.247959	0.364031
SPAC27E2.08	Tf2-6	transposable element	0.247935	0.364077
SPAC4D7.08c	ade4	amidophosphoribosyltransferase	0.247878	0.364187
SPCC4B3.15	mid1	medial ring protein Mid1	0.247856	0.36423
SPAC56F8.07	0	dubious	0.247561	0.3648
SPAPYUG7.06	0	PPPDE peptidase family	0.247007	0.365875
SPCC1494.10	adn3	transcriptional regulator	0.246819	0.36624
SPAC3H8.04	0	chromosome segregation proteinÊ(predicted)Ê	0.246568	0.366728
SPBC4C3.07	0	translation initiation factor eIF3f	0.246424	0.367008
SPAC30.01c	sec72	Sec7 domain	0.246196	0.367451
SPAC57A7.04c	pabp	mRNA export shuttling protein	0.24611	0.367619
SPAC22G7.09c	nup45	nucleoporin	0.245637	0.368541
SPAC3F10.12c	0	basic helix-loop-helix	0.245423	0.368958
SPAC16A10.07c	taz1	telomere maintenance: human TTAGGG repeat factor/TRF family protein Taz1	0.245287	0.369222
SPAC227.13c	isu1	iron ion homeostasis: iron-sulfur cluster assembly scaffold protein Isu1	0.245043	0.369699
SPAC26H5.07c	0	seven transmembrane receptor-like protein	0.244911	0.369958
SPCC10H11.01	prp11	mRNA splicing: DEAD/DEAH box helicase	0.244772	0.370228
SPAC1565.06c	spg1	GTPase	0.244544	0.370675
SPBC1711.04	0	folic acid biosynthesis: methylenetetrahydrofolate reductase	0.244481	0.370798
SPCC1739.14	npp106	nucleoporin Npp106	0.244285	0.371182
SPBC13E7.05	gpi14	phospholipid biosynthesis: pig-M	0.243789	0.372153
SPCC4B3.01	0	rhodanese-like domain	0.243394	0.372929
SPAC27E2.05	cdc1	telomere maintenance: DNA polymerase delta small subunit Cdc1	0.2431	0.373506
SPCC1919.05	0	TPR repeat protein	0.242883	0.373933
SPAC17C9.03	tif471	translation initiation factor eIF4G	0.242482	0.374723
SPBC24C6.07	cdc14	SIN component	0.242256	0.375167
SPAC17G8.14c	pck1	cell polarity/1,3-beta-glucan biosynthesis: protein kinase C	0.242019	0.375636
SPBC6B1.02	ppk30	actin cortical patch: Ark1/Prk1 family protein kinase Ppk30	0.242006	0.375661
SPAC20H4.10	ufd2	ubiquitin-protein ligase	0.241878	0.375913
SPAC144.07c	0	ATP binding proteinÊÊ Ê	0.241814	0.376039
SPAC24H6.09	gef1	cell polarity: RhoGEF Gef1	0.240684	0.378275
SPBC18H10.08c	ubp4	ubiquitin C-terminal hydrolase activity	0.239657	0.380311
SPBC1289.01c	chr4	chitin synthase regulatory factor	0.238985	0.38165
SPAC1687.04	0	conserved eukaryotic proteinÊÊ Ê	0.238802	0.382014
SPAC29B12.06c	rcd1	RNA-binding protein Rcd1: CCR4-NOT complex subunit; repression of conjugation	0.238639	0.38234
SPCC794.15	0	sequence orphan	0.238586	0.382445
SPAC1093.03	0	polyphosphoinositide phosphatase	0.238151	0.383313
SPCC1840.05c	0	phosphomannomutase	0.238091	0.383432
SPCC553.08c	0	GTPase	0.23806	0.383495
SPBC4C3.06	0	actin cortical patch: actin cytoskeletal protein Syp1ÊÊ Ê	0.238011	0.383592
SPAC17A5.01	0	peroxin-6	0.237427	0.384762
SPAC1486.02c	ucp14	UBA domain protein	0.237248	0.385119
SPAC25A8.01c	0	SNF2 family	0.237198	0.385219
SPAC23G3.09	taf4	transcription factor TFIID complex subunit Taf4	0.237009	0.385598
SPAC15A10.03c	rhp54	DEAD/DEAH box helicase	0.237001	0.385614
SPAC17A5.07c	ulp2	peptidase family C48	0.236779	0.38606
SPAC30C2.07	0	glycoprotein	0.236739	0.38614
SPAC30D11.07	nth1	DNA endonuclease III	0.236717	0.386183
SPCC1281.01	ags1	alpha-1,3-glucan synthase	0.236495	0.38663
SPBC800.10c	0	actin cortical patch: EPS15 repeat family actin cortical patch component (predicted)ÊÊ	0.236467	0.386686
SPCC4G3.07c	phf1	zinc finger protein	0.23627	0.387082
SPAC18B11.11	0	GTPase activating protein	0.23614	0.387342
SPCC16A11.09c	tim23	mitochondrial inner membrane presequence translocase complex subunit	0.235723	0.388181
SPAC144.13c	srw1	CDK inhibitor Srw1	0.23568	0.388268
SPCC1620.07c	0	conserved hypothetical: lunapark homolog	0.235639	0.388351
SPBC36.07	0	RNA polymerase II	0.235585	0.38846
SPBC1683.05	0	thiamine transporter	0.235557	0.388515
SPBPB2B2.12c	0	bifunctional enzyme	0.235453	0.388725
SPBP8B7.17c	0	vitamin metabolism: phosphomethylpyrimidine kinase	0.235357	0.388919
SPAC13G7.10	0	transcription factor	0.234805	0.390032
SPAC22E12.19	0	histone deacetylase complex subunit	0.234784	0.390075
SPAC19A8.05c	vps27	late endosome to vacuole transport: zinc finger protein	0.234494	0.390661
SPBC336.07	sfc3	transcription factor TFIIIC complex subunit Sfc3	0.234298	0.391056
SPAC19D5.07	0	4-aminobutyrate aminotransferase	0.234068	0.391522
SPCP1E11.06	apl4	adaptin	0.233898	0.391866
SPAC1002.08c	mtf1	rRNA processing: RNA polymerase specificity factor	0.233608	0.392453
SPAC1039.06	0	alanine racemase	0.233385	0.392906
SPAC959.09c	apc5	anaphase-promoting complex subunit Apc5	0.233257	0.393163
SPAC6G9.04	mug79	meiotically upregulated gene Mug79	0.23297	0.393746
SPAC6F6.02c	pof5	F-box protein	0.232475	0.394752
SPBC16E9.18	0	phospholipid biosynthesis: phosphatidylserine decarboxylase	0.232381	0.394944
SPBC21.01	mis17	kinetochore protein Mis17	0.232286	0.395136
SPBC29A10.10c	0	rRNA processing: tRNA-splicing endonuclease positive effector	0.232229	0.395253
SPCP1E11.02	ppk38	actin cortical patch: Ark1/Prk1 family protein kinase Ppk38	0.232122	0.395471
SPAC9E9.06c	0	threonine synthase	0.232121	0.395473
SPBC1A4.05	blt1	sequence orphan: septum; interacts with sad1	0.23186	0.396004
SPAC17A5.05c	0	conserved fungal proteinÊÊ Ê	0.231585	0.396565
SPAC1952.10c	0	plasma membrane protein	0.231502	0.396734
SPBC725.17c	rrn11	RNA polymerase I component	0.231426	0.396889
SPBC25H2.04c	tim22	TIM22 inner membrane protein import complex subunit Tim22	0.231347	0.39705
SPBC2G2.02	0	inositol polyphosphate phosphatase	0.230969	0.397823
SPCC1840.09	0	NAD dependent epimerase/dehydratase family proteinÊÊ Ê	0.230852	0.398061
SPBC83.05	0	mitochondrial RNA-binding protein (predicted)	0.230764	0.398242
SPBC30D10.07c	0	vitamin metabolism: biotin-protein ligase	0.230641	0.398492
SPAC26F1.04c	etr1	aerobic respiration: enoyl-[acyl-carrier protein] reductase	0.230211	0.399372
SPBC26H8.10	dis3	3'-5' exoribonuclease subunit Dis3	0.230142	0.399514
SPAC1002.16c	0	nicotinic acid plasma membrane transporter	0.229686	0.400449
SPAC328.09	0	mitochondrial carrier	0.22961	0.400604
SPAC343.05	vma1	V-type ATPase	0.229497	0.400836
SPCC1840.04	0	caspase	0.22942	0.400993
SPAC3F10.03	0	glycine tRNA-ligase	0.22915	0.401549
SPAPB1E7.02c	mcl1	G1/S transition: DNA polymerase alpha accessory factor Mcl1	0.229109	0.401632
SPAC3C7.02c	0	protein kinase inhibitor	0.229066	0.40172
SPAC23C4.10	sec2	guanyl-nucleotide exchange factor activity	0.229027	0.401801
SPAC24B11.08c	0	COPII-coated vesicle component	0.228971	0.401916
SPBC557.05	0	arrestin family	0.228843	0.40218
SPBC336.15	pic1	INCENP-like	0.228671	0.402533
SPAC9.12c	atp12	F1-ATPase chaperone	0.228557	0.402769
SPAC16E8.17c	0	aerobic respiration: succinate-CoA ligase	0.228375	0.403143
SPAC1420.01c	0	DUF1752 family protein, involved in regulation of transcriptionÊÊ Ê	0.228263	0.403374
SPAC1F12.09	gpi17	phospholipid biosynthesis: pig-S	0.228201	0.403502
SPBC106.19	0	sequence orphan	0.228076	0.403758
SPCC338.12	0	protease inhibitor	0.228064	0.403784
SPAC3G9.07c	hos2	centromere silencing: histone deacetylase	0.227973	0.40397
SPAC23D3.06c	nup146	nucleoporin	0.227917	0.404087
SPCC584.01c	0	sulfite reductase NADPH flavoprotein subunit	0.227835	0.404256
SPAC589.07c	0	WD repeat protein	0.227784	0.404361
SPAP8A3.09c	paa1	protein phosphatase regulatory subunit Paa1	0.227752	0.404427
SPAC6G10.02c	tea3	cell polarity: cell end marker Tea3	0.227411	0.405132
SPAC11G7.06c	mug132	S. pombe specific UPF0300 family protein 3	0.227289	0.405383
SPAC694.05c	rps2502	40S ribosomal protein S25	0.227289	0.405383
SPAC29B12.01	ino80	SNF2 family	0.227206	0.405555
SPAC11D3.07c	0	transcription factor	0.227006	0.405969
SPAC959.07	rps403	40S ribosomal protein S4	0.22682	0.406352
SPCC330.19c	0	sequence orphan	0.226494	0.407028
SPBC713.06	adl1	DNA ligase	0.226451	0.407116
SPBC32C12.02	ste11	transcription factor Ste11	0.226134	0.407774
SPCC1450.15	0	phospholipid biosynthesis: pig-F	0.226026	0.407998
SPAC22A12.01c	pso2	DNA 5' exonuclease	0.225955	0.408145
SPBC725.16	res1	G1/S transition: MBF transcription factor complex subunit Res1	0.225171	0.409773
SPAC139.01c	0	XP-G family	0.225137	0.409845
SPBC18E5.07	0	sequence orphan	0.224826	0.41049
SPBC691.03c	apl3	adaptin	0.224574	0.411016
SPAC29E6.03c	uso1	armadillo repeat protein	0.224504	0.411162
SPBP4H10.03	oxa102	mitochondrial inner membrane translocase Oxa102	0.224495	0.411181
SPAC3H5.12c	rpl501	60S ribosomal protein L5	0.224454	0.411266
SPAC2C4.15c	ubx2	UBX domain	0.223967	0.412281
SPAC11E3.11c	0	guanyl-nucleotide exchange factor activity	0.223786	0.41266
SPAC27E2.03c	0	GTP binding	0.223393	0.41348
SPBC16G5.05c	0	MSP domain	0.223242	0.413795
SPBC31E1.01c	atg2	transcription factor	0.223045	0.414209
SPCC550.11	0	RanBP7/importin-beta/Cse1p family	0.223016	0.414269
SPBC19C7.09c	uve1	endonuclease Uve1	0.223012	0.414277
SPBC21D10.09c	0	zinc finger protein	0.222454	0.415446
SPCC188.12	spn6	septin	0.221838	0.416739
SPBC11C11.07	rpl1801	60S ribosomal protein L18	0.221618	0.417201
SPAC12G12.15	sif3	sad1-interacting factor 3	0.220973	0.418558
SPBC2D10.06	rep1	G1/S transition: MBF transcription factor complex subunit Rep1	0.220965	0.418575
SPAC10F6.17c	0	protein phosphatase type 2C	0.220544	0.419462
SPBC2F12.11c	rep2	G1/S transition: transcriptional activator Rep2	0.220377	0.419814
SPBC16A3.11	eso1	DNA replication: sister chromatid cohesion protein	0.21994	0.420736
SPBC12D12.04c	pck2	cell polarity/1,3-beta-glucan biosynthesis: protein kinase C	0.219837	0.420953
SPAC16.02c	srp2	SR family	0.219627	0.421399
SPBC32H8.09	0	WD repeat protein	0.219516	0.421633
SPAC17C9.11c	0	zinc finger protein	0.219099	0.422514
SPCC1919.10c	myo52	cell polarity: myosin type V	0.218205	0.424412
SPAC1002.04c	taf11	transcription factor TFIID complex subunit Taf11	0.21813	0.42457
SPAC24B11.11c	sid2	Sid2p-Mob1p kinase complex	0.217917	0.425022
SPBC19C2.02	pmt1	DNA methyltransferase homolog	0.217841	0.425185
SPBC119.13c	prp31	mRNA splicing: U4/U6 x U5 tri-snRNP complex subunit Prp31	0.217035	0.426898
SPBC18E5.09c	0	sequence orphan; same as SPBC18E5.14c	0.216908	0.427168
SPBC3B9.15c	scp1	ergosterol biosynthesis: WD repeat protein	0.21688	0.427228
SPAC227.15	0	protein phosphatase regulatory subunit	0.216877	0.427236
SPAC16C9.06c	upf1	ATP-dependent RNA helicase	0.216782	0.427439
SPAC323.08	0	rRNA processing/mRNA cleavage: ribonuclease MRP complex subunit	0.216758	0.427489
SPBC119.09c	0	ORMDL family protein	0.216744	0.42752
SPCC970.03	0	cytochrome b5 reductase	0.216368	0.428321
SPBC646.07c	0	fatty acid biosynthesis: 3-oxo-5-alpha-steroid 4-dehydrogenase	0.216324	0.428416
SPAP32A8.03c	0	zinc finger protein	0.216275	0.428519
SPBC2D10.17	clr1	centromere silencing: cryptic loci regulator Clr1	0.216237	0.4286
SPAC30D11.14c	0	mRNA splicing: KH domain	0.215969	0.429174
SPAC12G12.14c	pfs2	G1/S transition: mRNA polyadenylation: WD repeat protein	0.215949	0.429217
SPCC576.08c	rps2	40S ribosomal protein S2	0.215857	0.429413
SPCC757.12	0	alpha-amylase	0.215628	0.429902
SPBC30B4.03c	adn1	conserved hypothetical: adhesion defective proteinÊÊ Ê	0.215567	0.430033
SPBP22H7.04	0	sequence orphan	0.215475	0.430229
SPAC24C9.05c	mug70	conserved protein (fungal and plant)	0.215436	0.430313
SPBC2D10.14c	myo51	myosin type V	0.215087	0.43106
SPBC12D12.01	sad1	spindle pole body protein Sad1	0.215005	0.431235
SPAC6G9.09c	rpl24	60S ribosomal protein L24	0.215003	0.43124
SPAC9G1.07	0	sequence orphanÊÊ Ê	0.214881	0.431501
SPAC13G6.01c	rad8	G1/S transition:ubiquitin-protein ligase	0.214868	0.43153
SPAC1002.05c	jmj2	zinc finger protein	0.21478	0.431719
SPAC20G8.06	not1	CCR4-Not complex subunit	0.214716	0.431856
SPBC2A9.02	0	NAD dependent epimerase/dehydratase family proteinÊÊ Ê	0.214538	0.432237
SPBC56F2.02	rpl1901	60S ribosomal protein L19	0.213998	0.433397
SPAC10F6.02c	prp22	mRNA splicing: ATP-dependent RNA helicase Prp22	0.213719	0.433997
SPCC1235.15	dga1	diacylglycerol O-acyltransferase	0.213642	0.434163
SPAC1B3.14	vma3	V-type ATPase	0.21334	0.434813
SPBC1734.03	0	folic acid biosynthesis: dihydropteroate synthase/2-amino-4-hydroxy-6-hydroxymethyldihydropteridine diphosphokinase/dihydroneopterin aldolase	0.213308	0.434881
SPAC4D7.07c	0	sequence orphan	0.213234	0.435041
SPBC1685.05	0	serine protease	0.212751	0.436081
SPAC23D3.05c	0	pseudogene	0.212751	0.436081
SPAC644.14c	rhp51	telomere maintenance: recombinase Rhp51	0.212659	0.436281
SPBC1734.11	0	chaperone regulator	0.212622	0.436359
SPBC2D10.20	ubc1	ubiquitin conjugating enzyme	0.212616	0.436373
SPBC20F10.02c	0	conserved hypothetical: DUF1741 family proteinÊÊ Ê	0.212602	0.436403
SPBC28F2.06c	mdm12	Mdm10/Mdm12/Mmm1 complex	0.212511	0.436599
SPAC4F10.20	grx1	oxidative stress response/redox homeostasis: glutaredoxin	0.211874	0.437974
SPBC405.03c	0	membrane transporter (predicted)	0.211553	0.438669
SPAC20G4.08	0	sequence orphan	0.21144	0.438913
SPCC1827.08c	pof7	F-box protein	0.211097	0.439656
SPBC11G11.01	fis1	TPR repeat protein	0.210928	0.440023
SPBC1347.10	cdc23	DNA replication initiation: MCM-associated protein Mcm10	0.210919	0.440043
SPBP8B7.30c	thi5	transcription factor	0.210859	0.440173
SPAC31G5.05c	0	vitamin metabolism: ribulose phosphate 3-epimerase	0.210833	0.44023
SPAC17H9.18c	0	dubious ORF	0.210722	0.44047
SPAC1D4.02c	0	mitotic spindle checkpoint: human GRASP protein homolog (predicted)	0.210531	0.440885
SPAC26F1.11	0	dubious ORF	0.210111	0.441796
SPAC26A3.14c	0	conserved hypothetical: DUF1748 family proteinÊÊ Ê	0.209868	0.442325
SPAC1B9.02c	sck1	serine/threonine protein kinase Sck1	0.209707	0.442674
SPCC594.03	0	dubious ORF	0.209606	0.442894
SPAC29A4.16	hal4	halotolerence protein 4	0.209551	0.443015
SPAC3G6.11	0	DEAD/DEAH box helicase	0.208827	0.444591
SPAC1687.05	pli1	telomere maintenance: SUMO E3 ligase Pli1	0.207975	0.446452
SPAC25H1.09	mde5	alpha-amylase	0.207947	0.446512
SPBP8B7.23	0	zinc finger protein	0.207749	0.446947
SPAC4H3.04c	0	UPF0103 family	0.207399	0.447712
SPCC126.08c	0	lectin	0.207178	0.448195
SPAC17A5.12	ucp7	UBA domain protein	0.207138	0.448283
SPCC569.06	0	S. pombe specific multicopy membrane protein family 1Ê	0.207033	0.448514
SPAC29A4.10	rrn5	RNA polymerase I upstream activation factor complex subunit Rrn5	0.206966	0.44866
SPAC7D4.06c	alg3	dolichol-P-Man dependent alpha	0.205812	0.451195
SPAC1F5.06	0	heat shock protein 70 family	0.205734	0.451366
SPAC8F11.05c	mug130	sequence orphan	0.20475	0.453533
SPBC3E7.08c	rad13	DNA repair nuclease Rad13	0.204592	0.453881
SPCC613.04c	rng3	UCS-domain protein	0.204457	0.45418
SPBC211.07c	ubc8	ubiquitin conjugating enzyme	0.204324	0.454472
SPAC11D3.16c	0	oxidative stress response: sequence orphan	0.204294	0.454539
SPAC1142.02c	0	conserved hypothetical: TPR repeat protein, SGT family	0.20429	0.454549
SPAC17A2.02c	0	DUF887 family protein	0.204241	0.454657
SPBC16D10.04c	dna2	DNA replication: DNA replication helicase Dna2	0.204105	0.454956
SPAC19G12.04	0	ureidoglycolate hydrolase	0.2038	0.45563
SPCC1682.14	rpl1902	60S ribosomal protein L19B	0.203231	0.456889
SPCC4B3.08	0	C-terminal domain kinase I (CTDK-I) gamma subunit (predicted): mRNA transcription and 3 processing	0.202979	0.457448
SPBC336.03	efc25	cell polarity: exchange factor Cdc25p-like	0.202868	0.457695
SPCC31H12.04c	rpl1202	60S ribosomal protein L12	0.202858	0.457717
SPCC417.10	0	membrane transporter	0.202531	0.458441
SPAC2F7.09c	0	conserved hypothetical: mitochondrial GTPase related protein (predicted)Ê	0.202433	0.458659
SPAC23C11.09	0	alanine-tRNA ligase	0.20209	0.459422
SPAC589.02c	srb9	mediator complex submodule	0.201163	0.461483
SPAC31G5.12c	maf1	repressor of RNA polymerase III Maf1ÊÊ Ê	0.200779	0.462339
SPBC16E9.05	erg6	ergosterol biosynthesis: delta-sterol C-methyltransferase	0.200711	0.46249
SPAC22E12.02	0	RNA-binding protein	0.200625	0.462682
SPCC24B10.10c	0	AAA family ATPase	0.20061	0.462715
SPBC577.06c	0	phospholipid biosynthesis: phosphatidylinositol kinase	0.200578	0.462788
SPBC16A3.15c	nda2	microtubule movement: tubulin alpha 1	0.1995	0.465195
SPAC16E8.03	gna1	glucosamine-phosphate N-acetyltransferase	0.199128	0.466026
SPAC22E12.16c	pik1	phospholipid biosynthesis: phosphatidylinositol kinase Pik1	0.198926	0.466481
SPAC27E2.01	0	alpha-amylase	0.198901	0.466537
SPAC30D11.10	rad22	DNA repair protein Rad22	0.198855	0.46664
SPAC4D7.03	pop2	F-box protein	0.198515	0.467401
SPAC328.01c	0	importin-beta family	0.198513	0.467405
SPBC14F5.09c	ade8	adenylosuccinate lyase Ade8	0.197928	0.468718
SPAC664.10	klp2	microtubule movement: kinesin-like protein Klp2	0.197918	0.468742
SPAC1565.05	0	sequence orphan	0.197703	0.469225
SPAC1F8.07c	0	pyruvate decarboxylase	0.197696	0.469239
SPBC776.09	ste13	ATP-dependent RNA helicase Ste13	0.197207	0.47034
SPBC337.16	cho1	phospholipid biosynthesis: phosphatidyl-N-methylethanolamine N-methyltransferase	0.197052	0.470688
SPBC839.04	rpl803	60S ribosomal protein L8	0.196989	0.470832
SPBC1861.05	0	conserved hypothetical: carbohydrate kinaseÊÊ Ê	0.19616	0.472701
SPAC27E2.10c	rfc3	DNA replication: DNA replication factor C complex subunit Rfc3	0.196123	0.472783
SPAC26F1.08c	0	conserved protein	0.196023	0.473009
SPBC2A9.04c	0	Sir Antagonist ortholog	0.195413	0.474388
SPBC26H8.01	thi2	vitamin metabolism: thiazole biosynthetic enzyme	0.195239	0.47478
SPBC18H10.12c	rpl701	60S ribosomal protein L7	0.195124	0.475042
SPCC1672.08c	tfa2	transcription factor TFIIE beta subunit Tfa2	0.195019	0.475279
SPAC7D4.10	vma13	V-type ATPase	0.195007	0.475306
SPCC737.09c	hmt1	ATP-binding cassette-type vacuolar membrane transporter Hmt1	0.194591	0.476248
SPAC6F12.02	rst2	transcription factor Rst2	0.19452	0.47641
SPCC1672.10	mis16	kinetochore protein Mis16	0.194057	0.477458
SPAC644.05c	0	deoxyuridine 5'-triphosphate nucleotidohydrolase	0.193973	0.477649
SPBC15D4.12c	mug98	sequence orphan: role in meiosis	0.193856	0.477915
SPAC1B1.03c	kap95	karyopherin	0.193771	0.478109
SPBC3D6.12	0	rRNA processing: U3 snoRNA associted protein Dip2 (predicted)	0.193697	0.478277
SPAC6G9.10c	sen1	rRNA processing: DNA2/NAM7 family	0.193435	0.478872
SPAC19G12.03	cda1	chitin deacetylase Cda1	0.193284	0.479215
SPAC227.14	0	nicotinamide riboside kinase (predicted)Ê	0.193218	0.479367
SPAC26F1.09	gyp51	GTPase activating protein	0.193186	0.479439
SPBC18E5.10	0	iron sulfur cluster assembly protein	0.193172	0.47947
SPAC1782.08c	rex3	rRNA processing: exonuclease Rex3	0.192812	0.480291
SPAC589.10c	0	ribosomal-ubiquitin fusion protein	0.192647	0.480665
SPBC1289.12	usp109	mRNA splicing: U1 snRNP-associated protein	0.192516	0.480964
SPCC970.02	0	mannan endo-1,6-alpha-mannosidase	0.192459	0.481095
SPAC11G7.01	0	glycoprotein	0.192061	0.482002
SPAPB1E7.01c	0	conserved fungal proteinÊÊ Ê	0.191874	0.482427
SPMIT.09	atp8	F0-ATPase subunit 8	0.191705	0.482814
SPCC1827.03c	0	acetyl-CoA ligase	0.19145	0.483396
SPBC32H8.08c	0	mannosyltransferase complex subunit	0.191361	0.4836
SPAC24H6.01c	0	phospholipid biosynthesis: O-acyl transferase	0.19131	0.483715
SPBC26H8.03	cho2	phospholipid biosynthesis: phosphatidylethanolamine N-methyltransferase Cho2	0.191246	0.483861
SPAC26F1.07	0	aldo/keto reductase	0.190849	0.484771
SPBC3F6.03	trr1	oxidative stress response: thioredoxin reductase	0.190824	0.484827
SPAC1F7.01c	spt6	SH2 domain	0.190753	0.48499
SPBC29A3.18	cyt1	cytochrome c1	0.190599	0.485342
SPAC17G6.05c	0	late endosome to vacuole transport: BRO1 domain protein	0.190279	0.486075
SPMIT.01	cox1	aerobic respiration: cytochrome c oxidase 1	0.190253	0.486136
SPAC1B1.02c	0	vitamin metabolism: NAD/NADH kinase	0.190173	0.486318
SPBC1347.03	meu14	meiotic expression upregulated	0.189963	0.4868
SPAC25H1.05	meu29	meiotic expression upregulated	0.189788	0.4872
SPCC1450.11c	cek1	serine/threonine protein kinase Cek1	0.189634	0.487555
SPBC1711.12	0	dipeptidyl peptidase	0.189422	0.488042
SPBC16A3.13	meu7 (aah4)	alpha-amylase	0.188784	0.489507
SPAC29B12.08	0	sequence orphanÊÊ Ê	0.188734	0.489623
SPBC146.06c	0	conserved hypothetical: VRR-NUC nuclease associated domain, human MTMR15 homologÊÊ Ê	0.188559	0.490026
SPAC9G1.10c	0	inositol polyphosphate phosphatase	0.188484	0.490197
SPAC30D11.09	cwf19	mRNA splicing: complexed with Cdc5 protein	0.188316	0.490585
SPCC16C4.06c	0	tRNA pseudouridylate synthase	0.187983	0.491353
SPAC29E6.05c	0	oxidative stress response: peptide methionine sulfoxide reductase	0.187824	0.491719
SPBC725.07	pex5	peroxisomal targeting signal receptor	0.187761	0.491863
SPCC364.04c	0	CASP family protein	0.187649	0.492122
SPBC23G7.04c	nif1	SEL1 repeat protein	0.187648	0.492124
SPCC285.16c	msh6	MutS protein homolog	0.187551	0.49235
SPCC11E10.05c	ynd1	nucleoside diphosphatase	0.187515	0.492432
SPBC1861.06c	mug131	S. pombe specific UPF0300 family protein 4Ê	0.187493	0.492483
SPAC4F8.12c	spp42	mRNA splicing: snRNP U5 complex subunit Spp42	0.187467	0.492543
SPAC4G8.09	0	leucine-tRNA ligase	0.187461	0.492556
SPAC6F12.09	rdp1	RNA interference/centromere silencing: RNA-directed RNA polymerase Rdp1	0.187191	0.493179
SPBP19A11.03c	mts4	19S proteasome regulatory subunit	0.18683	0.494014
SPAC1F3.07c	rsc58	chromatin remodeling complex subunit	0.186707	0.494298
SPBC1A4.11c	0	sequence orphan	0.186653	0.494424
SPAC1805.04	nup132	mitotic spindle checkpoint: nucleoporin Nup132	0.186502	0.494771
SPAC1486.03c	0	mRNA splicing: G-patch domain	0.186107	0.495686
SPAC6G9.05	0	peroxisomal coenzyme A diphosphatase	0.185878	0.496218
SPBC32H8.10	cdk9	cyclin-dependent protein kinase Cdk9	0.185693	0.496646
SPAC22F3.13	tsc1	hamartin	0.185572	0.496926
SPAC17G8.12	0	sequence orphan	0.185425	0.497269
SPAPB17E12.12c	0	mitochondrial transporter	0.185257	0.497658
SPBC3B9.11c	ctf1	mRNA polyadenylation: mRNA cleavage and polyadenylation specificity factor complex subunit Ctf1ÊÊ Ê	0.184957	0.498353
SPCC553.03	0	AAA family ATPase	0.184931	0.498415
SPBC1718.06	msp1	mitochondrial GTPase Msp1	0.18432	0.499835
SPBC646.06c	agn2	glucan endo-1,3-alpha-glucosidase Agn2	0.184249	0.499999
SPCC4G3.05c	mus81	DNA replication initiation: Holliday junction resolvase subunit Mus81	0.183839	0.500954
SPCC338.13	0	Golgi transport complex subunit	0.18373	0.501209
SPAC13G7.02c	ssa1	heat shock protein 70 family	0.18346	0.501836
SPMIT.03	0	aerobic respiration: mitochondrial DNA binding endonucleaseÊ(predicted) Ê	0.183289	0.502235
SPBC216.01c	0	DNA damage response protein (predicted)ÊÊ	0.183129	0.502609
SPAC19D5.03	cid1	DNA replication initiation: poly(A) polymerase Cid1ÊÊ Ê	0.183079	0.502725
SPCC338.05c	mms2	ubiquitin conjugating enzyme	0.182924	0.503087
SPBC1734.13	atp3	F1-ATPase gamma subunit	0.182861	0.503235
SPAC4H3.05	srs2	DNA replication: ATP-dependent DNA helicase, UvrD subfamily	0.182655	0.503716
SPCC297.05	0	GTP-binding protein	0.182635	0.503763
SPCC1450.01c	0	pseudogene	0.182478	0.504129
SPBC887.10	mcs4	oxidative stress response: two-component response regulator	0.182415	0.504275
SPAC31G5.19	0	TAT-binding protein homolog	0.182088	0.505041
SPAC9.09	met26	homocysteine methyltransferase	0.181022	0.507538
SPBC30D10.17c	0	glucan synthase regulator	0.180852	0.507936
SPBC776.11	rpl2801	60S ribosomal protein Ll28B 27a	0.180375	0.509056
SPAC17A5.04c	mde10	peptidase family M12B	0.180367	0.509075
SPBP26C9.02c	car1	arginase	0.179741	0.510546
SPAPB2B4.01c	gpi12	phospholipid biosynthesis: pig-L	0.179506	0.511098
SPAC22E12.17c	glo3	GTPase activating protein	0.179343	0.511483
SPAC13G6.15c	0	calcipressin	0.179188	0.511847
SPBC4F6.15c	swi10	DNA repair endonuclease	0.179075	0.512115
SPCC63.10c	0	dolichol kinase	0.178996	0.512301
SPCC1281.05	rsc7	nuclear localization factor	0.178996	0.512301
SPAC24B11.13	hem3	hydroxymethylbilane synthase	0.178647	0.513124
SPAC227.18	lys3	saccharopine dehydrogenase [NAD+, L-lysine forming]	0.178313	0.51391
SPCC162.07	ent1	actin cortical patch: epsin	0.178166	0.514257
SPAC23E2.02	lsd2	oxidoreductase	0.178039	0.514558
SPAC25A8.03c	0	conserved hypothetical: DUF185 protein	0.17776	0.515217
SPAC2E1P3.03c	Tf2-3	transposable element	0.177084	0.516815
SPAC26H5.04	0	armadillo repeat protein	0.176861	0.517344
SPBP22H7.06	0	vitamin metabolism: nicotinamide riboside kinase	0.176739	0.517632
SPBC14F5.11c	mug186	sorting nexin Snx41: retrograde transport, endosome to GolgiÊÊ Ê	0.176697	0.517733
SPAC31G5.02	0	ER chaperone Rot1 (predicted): unfolded protein response	0.176435	0.518355
SPBC651.01c	nog1	GTP binding protein Nog1	0.176176	0.518968
SPBC685.09	orc2	DNA replication initiation: origin recognition complex subunit Orc2	0.17616	0.519006
SPAC19G12.09	0	NADPH-dependent alpha-keto amide reductase	0.175645	0.520229
SPBC337.03	0	DUF618 family protein, involved in transcription termination (predicted)Ê	0.175579	0.520386
SPCC663.01c	ekc1	sap2 family	0.175535	0.520489
SPAC2F3.09	hem1	5-aminolevulinate synthase: heme biosynthesis	0.175471	0.520641
SPBC1105.11c	h3.3	centromere silencing: histone H3	0.175096	0.521533
SPBC18H10.09	0	zinc finger protein	0.174861	0.522092
SPAC644.16	0	mRNA polyadenylation: RNA-binding protein	0.174788	0.522265
SPBPB2B2.02	mug180	esterase/lipase (predicted)Ê	0.174709	0.522454
SPBC1347.08c	0	DNA replication: ribonuclease H2 complex subunitÊ(predicted)	0.174445	0.523082
SPAC688.07c	0	sequence orphan (cell tip/septum localization)	0.173925	0.524321
SPAC328.08c	0	tubulin specific chaperone	0.173884	0.524419
SPBC582.05c	brc1	BRCT domain	0.173674	0.52492
SPAC4F10.19c	0	zinc finger protein	0.173437	0.525487
SPAC22F8.08	0	GTPase activating protein	0.173369	0.525649
SPAC343.20	0	dubious ORF	0.173337	0.525726
SPBC609.04	caf5	spermine transporter family	0.173264	0.525901
SPAC15E1.04	0	thymidylate synthase	0.172535	0.527643
SPAC823.12	0	late endosome to vacuole transport: zinc finger protein Pep5/Vps11 (predicted)	0.172506	0.527711
SPBC1198.04c	zas1	zinc finger protein	0.17194	0.529067
SPBC336.13c	0	mitochondrial inner membrane peptidase complex	0.171725	0.529582
SPCC417.09c	0	transcription factor	0.171629	0.529813
SPBC215.01	0	GTPase activating protein	0.171553	0.529995
SPAC23H3.05c	swd1	WD repeat protein	0.171519	0.530075
SPAC26A3.02	myh1	adenine DNA glycosylase	0.171437	0.530272
SPBC839.11c	hut1	uridine diphosphate-N-acetylglucosamine transporter Hut1	0.171359	0.530461
SPBC12D12.02c	cdm1	DNA replication: DNA polymerase delta subunit Cdm1	0.171092	0.5311
SPBC577.09	0	WD repeat protein	0.170981	0.531368
SPAC26F1.06	gpm1	glycolysis: monomeric 2,3-bisphosphoglycerate	0.170803	0.531794
SPBC14F5.02	0	sequence orphan	0.169668	0.534525
SPBC839.07	ibp1	DNA replication: itty bitty phosphatase Ibp1	0.169577	0.534744
SPCC1183.06	ung1	uracil DNA N-glycosylase Ung1	0.169559	0.534788
SPAC23C4.19	spt5	transcription elongation factor Spt5	0.169339	0.535318
SPBC2A9.11c	0	nuclear export factorÊ(predicted) Ê	0.16926	0.535509
SPCC622.13c	tti1	Tel Two Interacting protein 1: chromatin remodeling	0.169086	0.535928
SPAPB17E12.10c	0	rRNA processing: SAM-dependent methyltransferase	0.169024	0.536078
SPAC890.02c	alp7	cell polarity: TACC homolog	0.168802	0.536613
SPCC622.09	htb1	histone H2B	0.16858	0.537149
SPAC23H3.09c	gly1	threonine aldolase	0.168507	0.537324
SPAC1071.11	0	NADH-dependent oxidoreductase	0.168505	0.53733
SPAC1805.05	cki3	serine/threonine protein kinase Cki3	0.168484	0.53738
SPAC4F10.10c	0	mannosyltransferase complex subunit	0.168188	0.538095
SPBC18H10.19	0	human UVRAG (UV radiation resistance) homolog: DNA repairÊÊ Ê	0.168105	0.538295
SPBC106.07c	0	peptide alpha-N-acetyltransferase	0.167855	0.538901
SPAPB1A10.06c	0	rRNA processing: ATP-dependent RNA helicase Dhr1 (predicted)	0.167747	0.539161
SPAC14C4.01c	0	conserved hypothetical: DUF1770 family protein	0.167706	0.53926
SPBC16C6.10	chp2	centromere silencing: chromodomain protein 2	0.167694	0.539289
SPCC191.07	cyc1	cytochrome c	0.167265	0.540328
SPBC16D10.08c	0	heat shock protein	0.167201	0.540482
SPBP8B7.29	0	folic acid biosynthesis: para-aminobenzoate synthase	0.167141	0.540627
SPCC1259.11c	gyp2	GTPase activating protein	0.166778	0.541508
SPBC1773.03c	0	aminotransferase	0.166745	0.541589
SPBC4F6.04	rpl2502	60S ribosomal protein L25	0.166719	0.541652
SPAC1142.08	fhl1	fork head transcription factor Fhl1	0.166696	0.541706
SPAC1F5.09c	shk2	PAK-related kinase Shk2	0.166318	0.542623
SPBC354.07c	0	oxysterol binding protein	0.166298	0.542671
SPAC9.02c	0	N-acetyltransferase	0.165963	0.543484
SPCC962.04	rps1201	40S ribosomal protein S12	0.165951	0.543516
SPAC110.02	pds5	cohesin-associated protein	0.165933	0.543559
SPBC17D11.05	tif32	translation initiation factor eIF3a	0.16567	0.544198
SPAC6F6.18c	tpz1	Tppl homolog Tpz1: telomere capping	0.16555	0.544489
SPBC3E7.15c	0	sphingosine N-acyltransferase	0.165453	0.544725
SPAC23H4.06	gln1	glutamate-ammonia ligase Gln1	0.165185	0.545376
SPAC16E8.11c	tfb1	transcription factor TFIIH complex subunit Tfb1	0.165105	0.545572
SPAC9G1.09	sid1	PAK-related kinase Sid1	0.164949	0.54595
SPBC21.06c	cdc7	serine/threonine protein kinase Cdc7	0.164786	0.546347
SPAC4F10.13c	mpd2	GYF domain	0.164225	0.547714
SPAC3A12.18	zwf1	pentose phoshate shunt: glucose-6-phosphate 1-dehydrogenase	0.163951	0.548382
SPCC24B10.06	0	glycoprotein	0.163905	0.548495
SPCC14G10.01	0	dephospho-CoA kinase	0.163829	0.548679
SPCC1494.08c	0	conserved fungal proteinÊÊ Ê	0.163802	0.548747
SPBC56F2.12	ilv5	amino acid/isoleucine synthesis: acetohydroxyacid reductoisomerase	0.163733	0.548916
SPCC622.15c	0	double-strand break repair protein	0.163487	0.549514
SPAC637.05c	vma2	V-type ATPase	0.163265	0.550056
SPAC521.05	rps802	40S ribosomal protein S8	0.162927	0.550883
SPBC1734.09	0	NST UDP-N-acetylglucosamine transporter	0.162551	0.551804
SPAC23C11.15	pst2	SIN3 family co-repressor	0.162466	0.552012
SPAC7D4.04	taf1	telomere maintenance: Taz1 interacting factor 1	0.16246	0.552027
SPAC1006.03c	0	conserved hypothetical (human CCDC131 homolog)	0.162089	0.552933
[truncated: 3,056 more rows]
