# Supplementary material for: Deciphering the Transcriptional-Regulatory Network of Flocculation in Schizosaccharomyces pombe
Source: PLoS Genet. 2012 Dec 6;8(12):e1003104. doi: 10.1371/journal.pgen.1003104 (PMC3516552; doi:10.1371/journal.pgen.1003104)
Supplement: Table S5 — rfl1-HA ChIP-chip data. (XLSX) [file pgen.1003104.s006.xlsx]

## Sheet: Sheet1
Table S5 rfl1-HA ChIP-chip data
Systematic Name	Gene Name	Description	No. of peaks detected	1st Peak High Average Ratio	2nd Peak High Average Ratio	3rd Peak High Average Ratio
SPAC4G8.03c		RNA-binding PUMILIO protein: deadenylation-dependent decay	2	7.44641	1.28772
SPCC1281.08	wtf11	wtf element	1	7.18927
SPCC1281.06c		fatty acid biosynthesis: acyl-coA desaturase	2	7.18927	1.58796
SPCC1281.07c		glutathione S-transferase	1	7.18927
SPCC13B11.01	adh1	alcohol dehydrogenase	1	6.96631
SPCC13B11.02c		sequence orphan	1	6.96631
SPAC1071.07c	rps1502	40S ribosomal protein S15	1	6.88015
SPAC1071.09c		DNAJ domain protein	2	6.88015	1.74027
SPAC1071.08	rpp203	60S acidic ribosomal protein	1	6.88015
SPBC26H8.01	thi2	vitamin metabolism: thiazole biosynthetic enzyme	2	6.86454	1.51086
SPBC1815.01	eno101	glycolysis: enolase	1	6.4625
SPAC1A6.04c	plb1	fungal cell wall: phospholipase B homolog Plb1	2	6.15973	2.29782
SPAC56F8.15		dubious ORF	1	6.08362
SPAC56F8.13		dubious ORF	1	6.08362
SPAC56F8.14c	mug115	sequence orphan	1	6.08362
SPBC8E4.01c		inorganic phosphate transporter	2	6.02682	2.76286
SPBC8E4.02c		sequence orphan	2	6.02682	1.50044
SPCC794.04c		MFS family membrane transporter	1	6.01109
SPAC9E9.06c		threonine synthase	1	5.96395
SPAC9E9.07c	ypt2	GTPase	2	5.96395	1.92339
SPCC11E10.01		cystathionine beta-lyase	1	5.92033
SPBC14F5.03c	kap123	karyopherin	1	5.86332
SPBC14F5.04c	pgk1	glycolysis: phosphoglycerate kinase	1	5.86332
SPAC17A2.10c		uncharacterized membrane protein	1	5.57688
SPAC17A2.11		sequence orphan (possible mitochondrion protein)	1	5.57688
SPAC4H3.07c		rhodanese-like domain	1	5.41519
SPAC4H3.08		short chain dehydrogenase	1	5.41519
SPAC4H3.06		sequence orphan	1	5.41519
SPBC839.14c		methyltransferase	2	5.22906	2.90631
SPBC839.13c	rpl1601	60S ribosomal protein L13/L16	1	5.22906
SPBC839.16		folic acid biosynthesis: C-1-tetrahydrofolate synthase	2	5.22906	2.90631
SPBC839.15c	ef1a-c	translation elongation factor EF-1 alpha	2	5.22906	2.90631
SPCC320.03		transcription factor	1	5.21121
SPBC32F12.11	tdh1	glycolysis/oxidative stress response: glyceraldehyde-3-phosphate dehydrogenase Tdh1	1	4.91808
SPBC32F12.15	tfb5	transcription factor TFIIH complex subunit Tfb5	1	4.91808
SPAPB18E9.04c		glycoprotein	1	4.84227
SPAPB18E9.05c		dubious ORF	2	4.84227	3.21667
SPCC1223.02	nmt1	vitamin metabolism: no message in thiamine	1	4.82369
SPCC1529.01		MFS family membrane transporter	1	4.76308
SPCC548.07c	ght1	hexose transporter	1	4.76308
SPAC4F8.07c	hxk2	glycolysis: hexokinase 2	1	4.73
SPAC4F8.08	mug114	sequence orphan	1	4.73
SPCC1739.14	npp106	nucleoporin Npp106	1	4.72683
SPCC1739.13	ssa2	heat shock protein 70 family	1	4.72683
SPBC19C2.08	prp38	mRNA splicing: U4/U6 x U5 tri-snRNP complex subunit Prp38	1	4.66387
SPBC19C2.06c		sequence orphan	2	4.66387	2.01588
SPBC19C2.09	sre1	ergosterol biosynthesis: membrane-tethered transcription factor	1	4.66387
SPBC19C2.07	fba1	glycolysis: fructose-bisphosphate aldolase Fba1	2	4.66387	2.01588
SPBC30B4.03c	adn1	conserved hypothetical: adhesion defective protein	1	4.37331
SPBC3D6.02	but2	neddylation pathway protein But2	2	4.34136	2.35501
SPBC31A8.02		pseudogene	2	4.34136	1.79186
SPAC9.08c		steroid reductase	2	4.19817	1.76793
SPAC9.09	met26	homocysteine methyltransferase	2	4.19817	1.76793
SPAC27E2.02		IMPACT homolog	1	4.14837
SPAPB15E9.03c	Tf2-5	transposable element	1	4.14837
SPAC27E2.01		alpha-amylase	1	4.14837
SPAC1F8.08		sequence orphan	1	4.04851
SPAC1F8.07c		pyruvate decarboxylase	1	4.04851
SPAC1F8.06	fta5	Sim4 and Mal2 associated	1	4.04851
SPBC354.11c		dubious ORF (sequence orphan)	2	3.95293	1.1745
SPBC354.12	gpd3	glycolysis: glyceraldehyde 3-phosphate dehydrogenase Gpd3	2	3.95293	1.1745
SPAC1039.10	mmf2	homologous Pmf1p factor 1	1	3.8857
SPCC1020.10	oca2	serine/threonine protein kinase Oca2	1	3.88422
SPCC1235.01		sequence orphan	1	3.63192
SPAC926.02		conserved fungal protein	2	3.47231	2.90338
SPAC1071.11		NADH-dependent oxidoreductase	1	3.47231
SPAC1071.12c	stp1	low molecular weight phosphotyrosine protein phosphatase	2	3.47231	2.90338
SPCC548.06c	ght8	hexose transporter	2	3.46732	1.57277
SPBC1685.13		non classical export pathway protein	1	3.39667
SPBC1685.12c		dubious ORF	2	3.39667	2.44884
SPAC26F1.09	gyp51	GTPase activating protein	1	3.37786
SPAC26F1.08c		conserved protein	1	3.37786
SPBC23G7.09	matmc_2	conjugation: mating-type m-specific polypeptide mc	1	3.36165
SPBC23G7.08c	rga7	actin cortical patch: GTPase activating protein	1	3.36165
SPBC23G7.17c	matmi_2	conjugation: mating-type M-specific polypeptide Mi	1	3.36165
SPBPB7E8.02		conserved hypothetical: PSP1 family protein	2	3.28499	1.29277
SPBPB7E8.01		glycoprotein	1	3.28499
SPAC1851.04c		DUF1339	1	3.27792
SPCC1742.01	gsf2	glycoprotein	1	3.22133
SPAPB15E9.01c	pfl2	glycoprotein	1	3.21667
SPAC140.04		conserved fungal protein	1	3.2128
SPCC794.01c		pentose phoshate shunt: glucose-6-phosphate 1-dehydrogenase	1	3.15718
SPCC794.02	wtf5	wtf element	1	3.15718
SPAC26F1.12c		conserved eukaryotic protein	1	3.1264
SPCC576.17c		MFS family membrane transporter	1	3.11183
SPAC13F5.03c	gld1	glycerol dehydrogenase	1	3.02284
SPAC13F5.05		redox homeostasis: thioredoxin family	1	3.02284
SPBC1709.06		tRNA dihydrouridine synthase	1	3.01418
SPBC1709.04c	cyp3	mRNA splicing/protein folding: cyclophilin family peptidyl-prolyl cis-trans isomerase Cyp3	1	3.01418
SPBC1709.05	sks2	heat shock protein 70 family	1	3.01418
SPBC15D4.01c		microtubule movement: kinesin-like protein	1	3.00333
SPBC15D4.02	rfl1	transcription factor	2	3.00333	1.43659
SPBC646.17c	dic1	microtubule movement: dynein intermediate chain Dic1	1	2.99808
SPCC417.15		dubious ORF	1	2.97975
SPCC191.01		sequence orphan	1	2.97975
SPBC1D7.03		cyclin	1	2.93785
SPCC576.03c	tpx1	oxidative stress response/redox homeostasis: thioredoxin peroxidase Tpx1	1	2.92077
SPCC576.04		bax inhibitor-like protein	1	2.92077
SPCC576.05		SAC3/GANp family	1	2.92077
SPBC36.02c		spermidine family transporter	2	2.91381	1.05225
SPAC926.03	rlc1	myosin II regulatory light chain	1	2.90338
SPAC15A10.03c	rhp54	DEAD/DEAH box helicase	1	2.8542
SPAC15A10.04c	zpr1	zinc finger protein	1	2.8542
SPAC14C4.15c		dipeptidyl aminopeptidase	1	2.79504
SPBP4G3.02	pho1	acid phosphatase	2	2.76286	2.3238
SPAC23D3.11	ayr1	phospholipid biosynthesis: 1-acyldihydroxyacetone phosphate reductase	1	2.76284
SPAC23D3.09	arp42	actin-like protein	1	2.76284
SPAC23D3.10c	eng2	endo-1,3-beta-glucanase Eng2	1	2.76284
SPCC24B10.22		DNA replication: DNA polymerase gamma catalytic subunit	1	2.73304
SPCC24B10.21	tpi1	glycolysis: triosephosphate isomerase	1	2.73304
SPAC1002.20		sequence orphan	1	2.73237
SPAC1002.12c		succinate-semialdehyde dehydrogenase	1	2.73237
SPAC1002.14	itt1	zinc finger protein	1	2.73237
SPAC1002.13c	psu1	fungal cell wall: beta-glucosidase Psu1	1	2.73237
SPBC1604.18c		late endosome to vacuole transport: SNF7 family class E vps	1	2.72552
SPBC1604.17c	tti2	Tel Two Interacting protein 2: chromatin remodeling	1	2.72552
SPBC530.10c	anc1	adenine nucleotide carrier Anc1	2	2.71052	1.12288
SPBC530.09c		cation dependent mannose-6-phosphate cargo receptor	2	2.71052	1.12288
SPBP23A10.11c		fungal cell wall: glycoprotein	2	2.69008	1.50674
SPCC1739.08c		short chain dehydrogenase	1	2.66814
SPCC1739.10	mug33	conserved fungal protein	1	2.66814
SPCC794.09c	ef1a-a	translation elongation factor EF-1 alpha	1	2.64661
SPBC685.08		sequence orphan	1	2.6304
SPBC685.09	orc2	DNA replication initiation: origin recognition complex subunit Orc2	1	2.6304
SPBC685.07c	rpl2701	60S ribosomal protein L27	1	2.6304
SPAC167.08	Tf2-2	transposable element	1	2.61811
SPAC1705.03c	ecm33	fungal cell wall: GPI anchored protein	1	2.61811
SPAC1705.02		conserved hypothetical: human 4F5S homolog	1	2.61811
SPCPB1C11.01	amt1	ammonium transporter	1	2.59622
SPAC24C9.12c		glycine hydroxymethyltransferase	1	2.58847
SPBC1347.13c		rRNA processing: ribose methyltransferase	1	2.57308
SPBC56F2.12	ilv5	amino acid/isoleucine synthesis: acetohydroxyacid reductoisomerase	1	2.57308
SPAC19B12.01		TPR repeat protein	1	2.57109
SPAC4F10.19c		zinc finger protein	1	2.57109
SPAC4F10.20	grx1	oxidative stress response/redox homeostasis: glutaredoxin	1	2.57109
SPBC36.03c		spermidine family transporter	1	2.52795
SPBC36.04	cys11	cysteine synthase	1	2.52795
SPCC622.08c	hta1	histone H2A	2	2.50941	1.17472
SPCC622.09	htb1	histone H2B	2	2.50941	1.17472
SPBC215.05	gpd1	glycerol-3-phosphate dehydrogenase Gpd1	2	2.48699	1.07571
SPAPB24D3.10c	agl1	alpha-glucosidase Agl1	1	2.48617
SPAC9.11		sequence orphan	1	2.48105
SPAC9.10		amino acid permease family	1	2.48105
SPBC13A2.04c		PTR family peptide transporter	1	2.44641
SPBC27.06c	mgr2	mitochondrial membrane protein Mgr1	1	2.43274
SPBC28F2.02	mep33	mitotic spindle checkpoint: mRNA export protein Mep33	1	2.43274
SPBC27.08c	sua1	sulfate adenylyltransferase	1	2.43274
SPAC29B12.03	spd1	DNA replication initiation: ribonucleotide reductase	1	2.4245
SPAC29B12.02c	set2	histone lysine methyltransferase Set2	1	2.4245
SPBC1711.02	matmc_1	conjugation: mating-type m-specific polypeptide mc	1	2.4049
SPBC1711.01c	matmi_1	conjugation: mating-type m-specific polypeptide mi	1	2.4049
SPAC30D11.13	hus5	SUMO conjugating enzyme	1	2.3975
SPAC30D11.12	rpl3802	60S ribosomal protein L38	1	2.3975
SPAC1751.01c	gti1	gluconate transporter inducer Gti1	2	2.3874	1.01182
SPAC1751.04		sequence orphan	1	2.3874
SPAC26H5.07c		seven transmembrane receptor-like protein	1	2.37082
SPAC26H5.08c	bgl2	fungal cell wall: glucan 1,3-beta-glucosidase	1	2.37082
SPAC10F6.01c		sulfite reductase beta subunit	1	2.36466
SPBC16H5.02	pfk1	glycolysis: 6-phosphofructokinase	2	2.35633	1.05647
SPAC26F1.13c		leucine-tRNA ligase	2	2.33619	1.46848
SPAC25B8.11		transcription factor	1	2.32323
SPAC25B8.10		trans-aconitate 3-methyltransferase	1	2.32323
SPAC25B8.09		trans-aconitate 3-methyltransferase	1	2.32323
SPBC428.02c	eca39	amino acid/isoleucine synthesis: branched chain amino acid aminotransferase Eca49	1	2.30899
SPBC428.04		sequence orphan	1	2.30899
SPBC428.03c	pho4	thiamine-repressible acid phosphatase Pho4	1	2.30899
SPAPB2B4.04c	pmc1	calcium signaling/homeostasis: P-type calcium ATPase	1	2.30663
SPAC1A6.11		dubious ORF	1	2.29782
SPCC553.10		glycoprotein	1	2.29311
SPCC553.09c	spb70	DNA replication initiation: DNA polymerase alpha B-subunit	1	2.29311
SPAC16A10.01		conserved hypothetical: DUF1212 family protein	1	2.2848
SPAC24C9.15c	spn5	septin	1	2.2848
SPBC29B5.02c	isp4	OPT oligopeptide transporter family	1	2.27837
SPAC19E9.03	pas1	G1/S transition:cyclin	2	2.27351	1.14527
SPAC27D7.08c		conserved hypothetical: DUF890 family protein	2	2.26368	1.16984
SPAC27D7.07c	smd1	mRNA splicing: Sm snRNP core protein Smd1	1	2.26368
SPAC27D7.09c		conserved hypothetical: But2 family protein	2	2.26368	1.16984
SPCC74.09	mug24	RNA-binding protein	1	2.25533
SPCC737.09c	hmt1	ATP-binding cassette-type vacuolar membrane transporter Hmt1	1	2.25533
SPCPJ732.03	meu15	meiotic expression upregulated	1	2.23773
SPBC713.12	erg1	ergosterol biosynthesis: squalene monooxygenase Erg1	1	2.20038
SPBC530.11c		transcription factor	2	2.16777	2.00181
SPBC609.01		ribonuclease II	1	2.14648
SPBC405.07	rpl3602	60S ribosomal protein L36	1	2.14648
SPBC354.06	mrps16	mitochondrial ribosomal protein subunit S16	1	2.13008
SPBC354.05c	sre2	membrane-tethered transcription factor	1	2.13008
SPCC622.12c		NADP-specific glutamate dehydrogenase	1	2.12692
SPAC222.08c		vitamin metabolism: pyridoxine biosynthesis protein	1	2.12479
SPAC222.09	seb1	RNA-binding protein Seb1: termination of RNA polymerase II transcription, poly(A)-independent	1	2.12479
SPAC11E3.15	rpl22	60S ribosomal protein L22	1	2.09651
SPAP8A3.02c	ofd2	2 OG-Fe(II) oxygenase superfamily protein Ofd2	1	2.09651
SPAC11H11.05c	fta6	Sim4 and Mal2 associated	1	2.09411
SPAC11H11.06	arp2	actin cortical patch: ARP2/3 actin-organizing complex subunit Arp2	1	2.09411
SPAC11H11.03c		conserved hypothetical: SMR and DUF1771 domain protein	2	2.09411	1.37942
SPAC3H1.11	hdr1	oxidative stress response: transcription factor	1	2.07792
SPCC645.08c	snd1	RNA interference: RNA-binding protein	1	1.99023
SPCC645.09	mrpl37	mitochondrial ribosomal protein subunit L37	1	1.99023
SPCC645.10		tRNA nucleotidyltransferase	1	1.99023
SPCC1672.02c	sap1	DNA replication: switch-activating protein Sap1	1	1.96533
SPAC664.15		WD repeat protein	1	1.9653
SPBC428.11		homocysteine synthase	2	1.92766	1.02639
SPAC9E9.08	rad26	DNA replication initiation: ATRIP	1	1.92339
SPAC821.03c		sequence orphan	1	1.89586
SPCC1223.03c	gut2	glycerol-3-phosphate dehydrogenase Gut2	2	1.89249	1.05261
SPCC1223.04c		lysine methyltransferase	1	1.89249
SPAC23H4.06	gln1	glutamate-ammonia ligase Gln1	1	1.86155
SPAC23H4.05c		dubious ORF	1	1.86155
SPBC32H8.02c	nep2	nedd8 protease Nep2	1	1.85251
SPBC32H8.03	bem46	esterase/lipase	1	1.85251
SPBC1105.02c	lys4	homocitrate synthase	1	1.84692
SPCC594.03		dubious ORF	1	1.84057
SPCC594.02c		conserved fungal protein	1	1.84057
SPAC644.06c	cdr1	GIN4 family protein kinase Cdr1	1	1.83454
SPBC1105.05	exg1	fungal cell wall: glucan 1,3-beta-glucosidase I/II precursor	2	1.82712	1.16387
SPBC1105.04c	cbp1	DNA replication: centromere silencing/DNA replication initiation: CENP-B homolog	2	1.82712	1.16387
SPBC31A8.01c	cwl1	reticulon-like protein	3	1.79186	1.28272	1.09748
SPAC6F6.07c	rps13	40S ribosomal protein S13	2	1.78447	1.37839
SPAC6F6.06c	rax2	cell polarity: plasma membrane protein	2	1.78447	1.37839
SPAC6F6.09		NuA4 histone acetyltransferase complex subunit (predicted)	1	1.78447
SPAC6F6.08c	cdc16	mitotic spindle checkpoint: two-component GAP for GTPase spg1	1	1.78447
SPAC9.07c		GTPase	1	1.76793
SPAC9.06c		conserved hypothetical: adducin	1	1.76793
SPCC576.09	rps20	40S ribosomal protein S20	1	1.76205
SPCC576.06c		tyrosine-tRNA ligase	1	1.76205
SPCC576.08c	rps2	40S ribosomal protein S2	1	1.76205
SPCC576.07	ret3	coatomer zeta subunit	1	1.76205
SPAC22A12.14c		BSD domain	1	1.75421
SPAC22A12.16		aerobic respiration: ATP-citrate synthase	1	1.75421
SPAC22A12.15c	bip1	BiP	1	1.75421
SPAC1071.10c	pma1	P-type proton ATPase	1	1.74027
SPCC1840.02c	bgs4	1,3-beta-glucan biosynthesis: 1,3-beta-glucan synthase subunit Bgs4	2	1.73616	1.2136
SPBC1685.10	rps27	40S ribosomal protein S27	1	1.72282
SPBC1685.11	rlp1	DNA replication: RecA family ATPase Rlp1	1	1.72282
SPBC1685.09	rps29	40S ribosomal protein S29	1	1.72282
SPAC12G12.04	mcp60	heat shock protein 60	1	1.72163
SPAC977.12		L-asparaginase	1	1.71435
SPAC977.13c		pseudogene	1	1.71435
SPAC16.02c	srp2	SR family	2	1.6998	1.21195
SPAC16.04		dihydrouridine synthase	2	1.6998	1.21195
SPAC16.03c	ura2	dihydroorotase	2	1.6998	1.21195
SPCC1393.09c		RWD domain	1	1.6992
SPAC140.03	arb1	RNA interference/centromere silencing: argonaute binding protein 1	1	1.67993
SPAC140.02	gar2	rRNA processing: GAR family	1	1.67993
SPCC594.01		conserved hypothetical: DUF1769 family protein	1	1.67785
SPBC839.03c		neddylation protein Dcn1	1	1.67319
SPBC839.04	rpl803	60S ribosomal protein L8	1	1.67319
SPBC839.05c	rps1701	40S ribosomal protein S17	2	1.67319	1.18035
SPAPB17E12.12c		mitochondrial transporter	1	1.66015
SPAPB17E12.13	rpl1802	60S ribosomal protein L18	1	1.66015
SPBC23G7.15c	rpp202	60S acidic ribosomal protein	1	1.65589
SPAC57A7.05		conserved protein (fungal and plant)	1	1.6516
SPAC57A7.04c	pabp	mRNA export shuttling protein	2	1.6516	1.08568
SPAC1B3.17	clr2	centromere silencing: chromatin silencing protein Clr2	1	1.6397
SPCC1902.01	gaf1	transcription factor Gaf1	1	1.63786
SPCC417.03		sequence orphan	1	1.63786
SPCC417.02	dad5	DASH complex subunit Dad5	1	1.63786
SPAC13G6.12c	chs1	chitin synthase I	1	1.6373
SPAC13G6.14	aps1	diadenosine 5',5'''-p1,p6-hexaphosphate hydrolase Aps1	1	1.6373
SPAC13G6.13		sequence orphan	1	1.6373
SPBC32H8.12c	act1	actin cortical patch/cell polarity: actin	1	1.63637
SPBC646.12c	gap1	conjugation: GTPase activating protein Gap1	2	1.63281	1.08568
SPBC646.13	sds23	CBS domain protein	1	1.63281
SPBC660.16		pentose phoshate shunt: phosphogluconate dehydrogenase, decarboxylating	1	1.61599
SPBC2G5.06c	hmt2	sulfide-quinone oxidoreductase	1	1.61166
SPBC1D7.02c	scr1	transcription factor Scr1	1	1.60593
SPAPJ760.02c	app1	actin cortical patch: App1 protein	1	1.57535
SPAPJ760.03c	adg1	glycoprotein	1	1.57535
SPBC2F12.09c	atf21	transcription factor Atf21	1	1.56845
SPBC2F12.10		mitochondrial ribosomal protein subunit L35	1	1.56845
SPBC2F12.08c	ceg1	mRNA guanylyltransferase Ceg1	1	1.56845
SPAC1B3.02c		transcription elongation factor, Elf1 family	1	1.55379
SPAC1B3.01c		uracil phosphoribosyltransferase	1	1.55379
SPAC1B3.03c	wis2	cyclophilin	1	1.55379
SPBPB2B2.05		GMP synthase [glutamine-hydrolyzing]	1	1.55311
SPBPB2B2.03c		pseudogene	1	1.55311
SPBPB2B2.04		pseudogene	1	1.55311
SPBC1778.05c		sequence orphan	1	1.54534
SPBP19A11.04c	mor2	cell polarity: HEAT repeat morphogenesis protein Mor2	1	1.53798
SPBP19A11.06	lid2	Lid2 complex subunit Lid2	1	1.53798
SPAP19A11.05c	mrp7	mitochondrial ribosomal protein subunit L27	1	1.53798
SPBC26H8.05c		serine/threonine protein phosphatase	1	1.53791
SPBC26H8.06	grx4	oxidative stress response/redox homeostasis: glutaredoxin	1	1.53791
SPBC1D7.05	byr2	conjugation: MAP kinase kinase kinase Byr2	1	1.52722
SPBC1D7.04	mlo3	RNA annealing factor Mlo3	1	1.52722
SPAC12G12.05c	taf9	transcription initiation factor Taf9 SAGA complex	1	1.51987
SPAC23A1.07		zinc finger protein	1	1.51789
SPAC23A1.06c	cmk2	DNA replication initiation: MAPK-activated protein kinase Cmk2	1	1.51789
SPAC6B12.16	meu26	conserved fungal protein	2	1.51743	1.02417
SPAC32A11.01	mug8	conserved fungal protein	1	1.51743
SPBP4H10.09	rsv1	transcription factor Rsv1	2	1.51591	1.12886
SPAC23E2.03c	ste7	meiotic suppressor protein Ste7	1	1.51362
SPBC1271.09		glycerophosphodiester transporter	1	1.51279
SPBC1677.03c		amino acid/isoleucine synthesis: threonine ammonia-lyase	2	1.51086	1.22483
SPBP23A10.12		conserved hypothetical: FRG1 family protein; nucleolus	1	1.50674
SPBC1A4.03c	top2	DNA topoisomerase II	2	1.50277	1.03448
SPBC1A4.04		sequence orphan	2	1.50277	1.03448
SPAPB1A10.14		F-box protein	1	1.50184
SPAPB1A10.12c	alo1	oxidative stress response: D-arabinono-1,4-lactone oxidase	1	1.50184
SPAPB1A10.13		sequence orphan: cell tip/septum localization	1	1.50184
SPAC19B12.11c		zinc finger protein	1	1.50081
SPAC19B12.13	cox1102	cytochrome c oxidase assembly protein Cox11	1	1.50081
SPAC19B12.12c	yip11	mRNA splicing: SMN family	1	1.50081
SPBC16G5.12c	top3	DNA replication: DNA topoisomerase III	1	1.49041
SPBC16G5.14c	rps3	40S ribosomal protein S3	1	1.49041
SPBC16G5.13		sequence orphan	1	1.49041
SPCC1827.03c		acetyl-CoA ligase	1	1.48944
SPCC1827.04		conserved hypothetical: ankyrin repeat protein	1	1.48944
SPCC1827.02c		phospholipid biosynthesis: cholinephosphate cytidylyltransferase	1	1.48944
SPBC354.09c		protease	1	1.46944
SPBC17G9.11c	pyr1	pyruvate carboxylase	1	1.46839
SPBC17G9.12c		conserved fungal protein	1	1.46839
SPCC1795.10c		DUF396	1	1.46708
SPCC1795.11	sum3	DNA replication initiation: ATP-dependent RNA helicase Sum3	1	1.46708
SPAC631.02		bromodomain protein	1	1.4609
SPAC631.01c	acp2	actin cortical patch: F-actin capping protein beta subunit	1	1.4609
SPBC83.18c		C2 domain	1	1.45783
SPBC29B5.01	atf1	transcription factor Atf1	1	1.45783
SPAC1834.08	mak1	histidine kinase Mak1	1	1.45492
SPAC6G10.10c		conserved hypothetical: human hmmtag2 homolog	2	1.45351	1.09623
SPAC6G10.11c	ubi3	ribosomal-ubiquitin fusion protein	2	1.45351	1.09623
SPAC1F7.12	yak3	aldose reductase YakC	2	1.44982	1.2642
SPAC1F7.11c		transcription factor	2	1.44982	1.2642
SPAC8C9.05		D-Tyr-tRNA deacylase	1	1.44967
SPAC8C9.04		sequence orphan:meiosis and sporulation function	1	1.44967
SPAC959.09c	apc5	anaphase-promoting complex subunit Apc5	1	1.44883
SPAP32A8.02		aldo/keto reductase	1	1.44883
SPCC736.15		protein kinase inhibitor	2	1.44508	1.37339
SPBC18H10.19		human UVRAG (UV radiation resistance) homolog: DNA repair	1	1.4345
SPBC18H10.18c		sequence orphan	2	1.4345	1.04688
SPAC29A4.16	hal4	halotolerence protein 4	1	1.42667
SPAC29A4.14c		peroxin	1	1.42667
SPAC29A4.15		serine-tRNA ligase	1	1.42667
SPBC530.15c		spermidine family transporter	1	1.41459
SPBC36.01c		spermidine family transporter	1	1.41459
SPCC16C4.13c	rpl1201	60S ribosomal protein L12.1/L12A	1	1.4096
SPCC16C4.12		NatB N-acetyltransferase complex catalytic subunit Nat3	1	1.4096
SPBC16D10.11c	rps1801	40S ribosomal protein S18	1	1.4002
SPBC317.01	mbx2	MADS-box transcription factor Pvg4	1	1.4002
SPAC1834.09	mug51	conserved fungal protein	1	1.39385
SPAC24C9.07c	bgs2	1,3-beta-glucan biosynthesis: 1,3-beta-glucan synthase subunit Bgs2	1	1.39374
SPAC24C9.08		vacuolar carboxypeptidase	1	1.39374
SPBC800.13		histine H4 variant	1	1.39085
SPBC800.12c		ubiquitin family protein	1	1.39085
SPBC1683.08	ght4	hexose transporter	1	1.3835
SPCC330.05c	ura4	orotidine 5'-phosphate decarboxylase Ura4	2	1.38116	1.36509
SPCC330.06c		oxidative stress response/redox homeostasis: thioredoxin peroxidase	1	1.38116
SPAC17G6.11c		glucosidase	1	1.38112
SPAC17G6.12	cul1	cullin 1	1	1.38112
SPCC1235.15	dga1	diacylglycerol O-acyltransferase	2	1.38105	1.01114
SPCC1235.14	ght5	hexose transporter	2	1.38105	1.01114
SPAPB1E7.07		glutamate synthase	1	1.38047
SPAC11H11.02c		sequence orphan	1	1.37942
SPAC11H11.04	mam2	conjugation: pheromone p-factor receptor	1	1.37942
SPAC664.04c	rps1602	40S ribosomal protein S16	1	1.37181
SPAC664.06	rpl703	60S ribosomal protein L7	1	1.37181
SPAC664.05	rpl13	60S ribosomal protein L13	1	1.37181
SPCC330.04c	mug135	conserved hypothetical: cell surface glycoprotein (predicted), DUF1773 family protein 3	1	1.36509
SPAC22E12.10c	etp1	ferredoxin	1	1.35203
SPAC22E12.09c	krp1	kexin	1	1.35203
SPBPB2B2.01		amino acid permease family	1	1.35195
SPAC6B12.07c		zinc finger protein	1	1.34733
SPAC6B12.06c		conserved fungal protein	1	1.34733
SPAC6B12.08		zinc finger protein	1	1.34733
SPAC1786.02		fungal cell wall: phospholipase	1	1.34565
SPAC1786.04		sequence orphan	1	1.34565
SPBC1A4.10c	pmc1	mediator complex subunit Pmc1	1	1.33639
SPBP23A10.02	pkr1	V-ATPase assembly factor Pkr1 (predicted)	1	1.33639
SPBP23A10.04	apc2	anaphase-promoting complex subunit Apc2	1	1.33639
SPBP23A10.03c		ACN9 family mitochondrial protein: gluconeogenesis	1	1.33639
SPCC4G3.02	aph1	bis	1	1.33445
SPCC4G3.03		WD repeat protein	2	1.33445	1.07708
SPCC364.07		D-3 phosphoglycerate dehydrogenase	1	1.33445
SPCC962.01		C2 domain	1	1.32289
SPCP31B10.08c	rpl35a	60S ribosomal protein L35a	1	1.32289
SPAC24H6.09	gef1	cell polarity: RhoGEF Gef1	1	1.31847
SPAC24H6.08		sequence orphan	1	1.31847
SPBC2F12.14c	gua1	IMP dehydrogenase Gua1	1	1.31688
SPBC3E7.02c	hsp16	heat shock protein	2	1.31637	1.10061
SPBC3E7.01	fab1	1-phosphatidylinositol-3-phosphate 5-kinase Fab1	2	1.31637	1.10061
SPBC16E9.18		phospholipid biosynthesis: phosphatidylserine decarboxylase	1	1.31396
SPBC16E9.16c	lsd90	fatty acid biosynthesis: Lsd90 protein: possible role in fatty acid synthesis	2	1.31396	1.16423
SPBC16E9.17c	rem1	meiosis-specific cyclin Rem1	1	1.31396
SPAC227.18	lys3	saccharopine dehydrogenase [NAD+, L-lysine forming]	1	1.31114
SPAC227.16c		DNA replication initiation: GINS complex subunit Psf3	1	1.31114
SPAC806.11		dubious ORF	1	1.30646
SPAC821.10c	sod1	oxidative stress response: superoxide dismutase Sod1	1	1.30362
SPBC2G5.04c		COPII-coated vesicle component	2	1.2982	1.00921
SPBC2G5.05		vitamin metabolism: transketolase	2	1.2982	1.00921
SPAC1F7.06		conserved hypothetical: ThiJ domain protein	2	1.28947	1.26854
SPAC1F7.05	cdc22	ribonucleoside reductase large subunit Cdc22	2	1.28947	1.19939
SPBC119.03		S-adenosylmethionine-dependent methyltransferase	1	1.287
SPBC119.02	ubc4	ubiquitin conjugating enzyme	1	1.287
SPBC651.12c		sequence orphan (spindle)	2	1.28272	1.09748
SPBC651.11c	apm3	AP-3 adaptor complex subunit Apm3	2	1.28272	1.09748
SPBC16A3.07c	nrm1	negative regulator of MBF	1	1.26995
SPBC16A3.08c		telomere maintenance: nuclear telomere cap complex subunit	1	1.26995
SPAC1399.01c		purine permease	1	1.26814
SPAC1399.02		membrane transporter	1	1.26814
SPBC19C2.12	mrpl51	mitochondrial ribosomal protein subunit L51	1	1.26772
SPBC19C2.11c		mitochondrial outer membrane protein	1	1.26772
SPAC19G12.15c	tpp1	trehalose-6-phosphate phosphatase Tpp1	1	1.25953
SPBC1921.03c	mex67	Tap homolog	1	1.2538
SPBC1921.05	ape1	aminopeptidase	1	1.2538
SPBC1921.04c		sequence orphan	1	1.2538
SPBC215.03c	csn1	COP9/signalosome complex subunit Csn1	1	1.25205
SPBC215.04	git11	heterotrimeric G protein gamma subunit Git11	1	1.25205
SPAC25G10.09c	pan1	actin cortical patch: component, with EF hand and WH2 motif Panl (predicted)	1	1.24543
SPAC27F1.02c	cdc8	tropomyosin	1	1.24543
SPAC27F1.03c	uch1	ubiquitin C-terminal hydrolase activity	1	1.24543
SPBC19C7.04c		conserved fungal protein	2	1.23864	1.12723
SPCC18B5.01c	bfr1	ABC transporter family: brefeldin A efflux transporter Bfr1	2	1.23364	1.00085
SPAC5D6.01	rps2202	40S ribosomal protein S15a	1	1.23167
SPAC5D6.02c		sequence orphan	1	1.23167
SPAC9E9.10c	cbh1	centromere silencing: centromere binding protein	1	1.23075
SPAC9E9.11	plr1	vitamin metabolism: pyridoxal reductase	1	1.23075
SPAC13G7.13c	msa1	RNA-binding protein: negative regulation of conjugation with cellular fusion	1	1.2283
SPAC13G7.12c		phospholipid biosynthesis: choline kinase	1	1.2283
SPAC24C9.06c		aerobic respiration: aconitate hydratase	1	1.22619
SPBC1604.01		sulfatase modifying factor 1 related	1	1.22483
SPBC1677.02	dpm3	phospholipid biosynthesis: dolichol-phosphate mannosyltransferase subunit 3	1	1.22483
SPAC3H1.06c		membrane transporter	1	1.21653
SPAC3H1.07		arginase	1	1.21653
SPAC3H1.08c		conserved hypothetical: DUF1640 family protein	1	1.21653
SPCC1840.03	sal3	karyopherin	1	1.2136
SPAC1002.16c		nicotinic acid plasma membrane transporter	1	1.21339
SPAC1002.18	urg3	conserved hypothetical (DUF1688 family protein)	1	1.21339
SPAC1002.15c	pmc5	mediator complex subunit Pmc5	1	1.21339
SPAC1002.17c		uracil phosphoribosyltransferase	1	1.21339
SPAC3G9.14	sak1	transcriptional repressor	1	1.20279
SPAC3G9.13c	msw1	tryptophan-tRNA ligase	1	1.20279
SPBC16D10.06		ZIP zinc transporter domain	1	1.20062
SPAC1834.02	aro1	pentafunctional aromatic polypeptide Aro1	2	1.19453	1.0482
SPAC1834.01	sup45	translation release factor eRF1	2	1.19453	1.0482
SPBC24C6.09c		phosphoketolase	1	1.18904
SPCC31H12.05c	sds21	serine/threonine protein phosphatase Sds21	1	1.18182
SPCC31H12.06		sequence orphan	1	1.18182
SPCC31H12.04c	rpl1202	60S ribosomal protein L12	1	1.18182
SPBC839.06	cta3	calcium signaling/homeostasis: cation-transporting P-type ATPase Cta3	1	1.18035
SPBC29A3.05		zinc finger protein	1	1.1773
SPBC29A3.06		CGI-48 family	1	1.1773
SPBC29A3.03c		zinc finger protein	1	1.1773
SPCC622.06c		dubious ORF	1	1.17472
SPCC622.07		dubious ORF	1	1.17472
SPBC354.13	rga6	GTPase activating protein Rga6	1	1.1745
SPBC19C2.04c	ubp11	ubiquitin C-terminal hydrolase activity	1	1.17156
SPAC227.11c		sensor for misfolded ER glycoproteins Yos9	1	1.1684
SPAC227.12		mRNA splicing: U4/U6 x U5 tri-snRNP complex subunit Prp4 family	1	1.1684
SPAC227.13c	isu1	iron ion homeostasis: iron-sulfur cluster assembly scaffold protein Isu1	1	1.1684
SPAC3F10.15c	spo12	spo12 family protein	1	1.16695
SPAC29A4.12c	mug108	sequence orphan	1	1.1666
SPAC29A4.13		urease accessory protein	1	1.1666
SPAP8A3.05		translation release factor	1	1.16531
SPAP8A3.04c	hsp9	heat shock protein	1	1.16531
SPAC110.01	ppk1	serine/threonine protein kinase	2	1.16343	1.15899
SPBC1A4.01	apc10	anaphase-promoting complex subunit Apc10	2	1.16219	1.01295
SPBC1E8.05		glycoprotein	2	1.16219	1.01295
SPCC569.05c		spermidine family transporter	1	1.161
SPCC569.06		S. pombe specific multicopy membrane protein family 1	1	1.161
SPCC594.07c		sequence orphan	1	1.15148
SPCC1682.01	qcr9	aerobic respiration: ubiquinol-cytochrome-c reductase complex subunit 10	1	1.15148
SPCC594.06c		SNARE	1	1.15148
SPCC18.12c		rRNA processing: DUF652	1	1.14872
SPCC18.15		WD repeat protein	1	1.14872
SPCC18.14c	rpp0	60S acidic ribosomal protein	1	1.14872
SPCC18.13		WD repeat protein	1	1.14872
SPBC83.02c	rpl4302	60S ribosomal protein L37a	1	1.14775
SPAC4A8.04	isp6	serine protease	1	1.14712
SPAC4A8.03c	ptc4	protein phosphatase 2C Ptc4	1	1.14712
SPAC19G12.05		mitochondrial citrate transporter	2	1.14593	1.00806
SPAC19G12.02c	pms1	MutL family	2	1.14593	1.00806
SPAC19G12.04		ureidoglycolate hydrolase	2	1.14593	1.00806
SPAC19G12.03	cda1	chitin deacetylase Cda1	2	1.14593	1.00806
SPAC57A10.02	cdr2	GIN4 family protein kinase Cdr2	1	1.14527
SPBP8B7.04		sequence orphan	1	1.14502
SPBP8B7.01c		rRNA processing: RNAseP RNAse MRP subunit Pop7 (predicted)	1	1.14502
SPBP8B7.03c	rpl402	60S ribosomal protein L2	1	1.14502
SPBP8B7.02		sequence orphan (septum localization)	1	1.14502
SPAPB2C8.01		glycoprotein	1	1.14497
SPAC3H1.12c	snt2	Lid2 complex subunit Snt2	1	1.14377
SPAC3H1.14		cytoplasmic vesicle protein	1	1.14377
SPAC3H1.13	ppk13	serine/threonine protein kinase Ppk13	1	1.14377
SPBC8D2.03c	hhf2	histone H4	2	1.14203	1.02186
SPBC409.07c	wis1	MAP kinase kinase Wis1	1	1.13777
SPAC10F6.15		S. pombe specific UPF0300 family protein 1; meiosis role	1	1.13336
SPAC10F6.14c		ABC1 kinase family protein	1	1.13336
SPBP4H10.08	qcr10	ubiquinol-cytochrome-c reductase complex subunit Qcr10	1	1.12886
SPAC1B3.14	vma3	V-type ATPase	1	1.12505
SPAC1B3.12c	rpb10	DNA-directed RNA polymerase I, II, and III subunit Rpb10	1	1.12505
SPAC1B3.13		rRNA processing: U3 snoRNP-associated protein Nan1	1	1.12505
SPAC1F7.09c		allantoicase	1	1.11892
SPAC1F7.10		hydantoin racemase	1	1.11892
SPBC1683.01		inorganic phosphate transporter	1	1.11821
SPAC13C5.02	dre4	DNA replication: WW domain	1	1.11817
SPAC13C5.01c		20S proteasome component	1	1.11817
SPAC9G1.04	oxa101	mitochondrial inner membrane translocase Oxa101	1	1.11582
SPAC9G1.03c	rpl3001	60S ribosomal protein L30	1	1.11582
SPBC1105.14		zinc finger protein	1	1.1134
SPBC1105.13c		sequence orphan	1	1.1134
SPAC1805.09c	fmt1	methionyl-tRNA formyltransferase Fmt1	1	1.11115
SPAC1805.13	rpl14	60S ribosomal protein L14	1	1.11115
SPAC13G6.10c		serine-rich protein	1	1.10861
SPAC11E3.10		VanZ-like family protein	3	1.1068	1.02528	1.00581
SPAC22A12.06c		serine hydrolase	1	1.10107
SPBC2F12.03c		telomere maintenance: EST1 family protein	1	1.10009
SPBC2F12.04	rpl1701	60S ribosomal protein L17	1	1.10009
SPAC110.04c	pss1	heat shock protein 70 family	1	1.09606
SPAP14E8.02	tos4	homolog of S. cerevisiae Tos4 (SBF)	1	1.09606
SPCPB16A4.03c	ade10	IMP cyclohydrolase	1	1.09436
SPCC1620.06c		ribose-phosphate pyrophosphokinase	1	1.09187
SPCC1620.07c		conserved hypothetical: lunapark homolog	1	1.09187
SPBC3H7.02		sulfate transporter	2	1.09087	1.02474
SPAC167.07c		ubiquitin-protein ligase	1	1.08568
SPBC1604.05	pgi1	glycolysis: glucose-6-phosphate isomerase	1	1.08493
SPAC29E6.04	nnf1	kinetochore protein Nnf1	1	1.08206
SPAC29E6.03c	uso1	armadillo repeat protein	1	1.08206
SPAC29E6.05c		oxidative stress response: peptide methionine sulfoxide reductase	1	1.08206
SPCC4G3.04c	coq5	aerobic respiration: C-methytransferase	1	1.07708
SPBC3D6.04c	mad1	mitotic spindle checkpoint: mitotic spindle checkpoint protein Mad1	1	1.07231
SPBC3D6.05	ptp4	phosphatidate cytidylyltransferase Ptp4	1	1.07231
SPCC794.03		amino acid permease family	1	1.07227
SPAC3G9.09c	tif211	translation initiation factor eIF2 alpha subunit	1	1.07096
SPAC3G9.10c	ski6	rRNA processing: exosomal 3'-to-5' phosphorolytic exoribonuclease Ski6 (predicted)	1	1.07096
SPCC1393.08		zinc finger protein	1	1.07009
SPCC1393.07c	mug4	sequence orphan	1	1.07009
SPAC17A5.02c	dbr1	mRNA splicing: RNA lariat debranching enzyme	1	1.06825
SPAC17A5.04c	mde10	peptidase family M12B	1	1.06825
SPAC17A5.03	rpl301	60S ribosomal protein L3	1	1.06825
SPAC9E9.02		dubious ORF	1	1.0679
SPAC16.05c	sfp1	transcription factor	1	1.0679
SPAC9E9.17c		dubious ORF	1	1.0679
SPAC26H5.06	pot1	telomere maintenance: telomere end-binding protein	1	1.06781
SPCC895.07	alp14	mitotic spindle checkpoint: Mad2-dependent spindle checkpoint component	1	1.05993
SPAC5H10.07		sequence orphan	1	1.05739
SPAC5H10.06c	adh4	alcohol dehydrogenase	1	1.05739
SPCC757.13		membrane transporter	1	1.056
SPCC757.12		alpha-amylase	1	1.056
SPCC1753.02c	git3	G-protein coupled receptor Git3	1	1.05535
SPCC1753.01c	ssb2	DNA replication: single-stranded DNA binding protein Ssb2	1	1.05535
SPCC757.09c	rnc1	RNA-binding protein that supresses calcineurin deletion Rnc1	1	1.05332
SPCC757.08		rRNA processing: exosome subunit Rrp45 (predicted)	1	1.05332
SPBC18H10.17c		mitochondrial ribosomal protein subunit Mrp49	1	1.04688
SPCC285.15c	rps2802	40S ribosomal protein S28	1	1.0465
SPBC4B4.09	prp39	mRNA splicing: U1 snRNP-associated protein	2	1.04399	1.03625
SPBC4B4.08	ght2	hexose transporter	2	1.04399	1.03625
SPAC15A10.11	ubr11	ubiquitin-protein ligase	1	1.03634
SPAC227.02c		rRNA processing: rRNA processing protein Rrp15 (predicted)	1	1.03502
SPAC227.04		autophagy C terminal domain family	1	1.03502
SPAC227.01c		EXS family protein	1	1.03502
SPBC21B10.13c	yox1	MBF complex negative regulatory component	1	1.03498
SPBC19F5.01c	puc1	cyclin	1	1.03342
SPAC24B11.06c	sty1	oxidative stress response: MAP kinase Sty1	1	1.02928
SPAC24B11.05		pyrimidine 5'-nucleotidase	1	1.02928
SPBC4F6.04	rpl2502	60S ribosomal protein L25	1	1.02924
SPBC3E7.15c		sphingosine N-acyltransferase	1	1.02924
SPBC3E7.16c	leu3	amino acid/leucine biosynthesis: 2-isopropylmalate synthase	1	1.02924
SPAC11E3.09	pyp3	protein-tyrosine phosphatase Pyp3	2	1.02528	1.00581
SPAC6B12.14c		conserved fungal protein: may be dubious ORF	1	1.02417
SPAC6B12.15	cpc2	WD repeat protein Cpc2	1	1.02417
SPBC8D2.04	hht2	centromere silencing: histone H3	1	1.02186
SPBC405.02c		sequence orphan	1	1.02098
SPBC405.03c		membrane transporter (predicted)	1	1.02098
SPAC26H5.03		WD repeat protein	1	1.02092
SPAC23A1.19c		DEAD/DEAH box helicase	1	1.02092
SPAC26H5.02c		DNA replication: AAA family ATPase	1	1.02092
SPBC354.07c		oxysterol binding protein	1	1.01335
SPAC630.14c	tup12	transcriptional corepressor Tup12	1	1.01182
SPBC3B9.01		Hsp70 nucleotide exchange factor	1	1.01099
SPBC32C12.03c	ppk25	serine/threonine protein kinase	1	1.01099
SPAC29B12.07	sec16	multidomain vesicle coat component Sec16	1	1.00952
SPAC29B12.06c	rcd1	RNA-binding protein Rcd1: CCR4-NOT complex subunit; repression of conjugation	1	1.00952
SPAC29B12.05c		S-adenosylmethionine-dependent methyltransferase	1	1.00952
SPAC139.05		succinate-semialdehyde dehydrogenase	1	1.00537
SPAC139.04c	fap2	L-saccharopine oxidase	1	1.00537
SPAC139.06	hat1	histone acetyltransferase complex subunit	1	1.00537
SPACUNK4.16c		alpha,alpha-trehalose-phosphate synthase	1	1.00326
SPACUNK4.17		dehydrogenase	1	1.00326
SPACUNK4.19	mug153	sequence orphan (role in meiosis)	1	1.00326
