# Supplementary material for: Deciphering the Transcriptional-Regulatory Network of Flocculation in Schizosaccharomyces pombe
Source: PLoS Genet. 2012 Dec 6;8(12):e1003104. doi: 10.1371/journal.pgen.1003104 (PMC3516552; doi:10.1371/journal.pgen.1003104)
Supplement: Table S8 — Expression Microarray Profiling of yox1 deletion strain versus isogenic wild type. (XLSX) [file pgen.1003104.s009.xlsx]

## Sheet: Sheet1
Table S8 Expression Microarray Profiling of yox1 deletion strain vs. isogenic wild type
Systematic Name	Gene Name	Description	yox1 Del log2 Fold Change	yox1 Del Stdev
SPCC663.04	rpl39	60S ribosomal protein L39	3.2881	0.0893384
SPBC776.01	rpl29	60S ribosomal protein L29	3.27588	0.361533
SPAC3G6.13c	#N/A	60S ribosomal protein L41	3.20038	0.0280325
SPAC30D11.12	rpl3802	60S ribosomal protein L38	3.18207	0.0502529
SPAC3F10.18c	#N/A	60S ribosomal protein L41	3.05783	0.359408
SPAC4G8.02c	sss1	translocon gamma subunit Sss1	2.98009	0.278111
SPAC25G10.06	rps2801	40S ribosomal protein S28	2.92038	0.468369
SPBC1711.15c	0	sequence orphan	2.82532	0.104844
SPBC19G7.03c	rps3002	40S ribosomal protein S30	2.69599	0.244105
SPBC16A3.07c	nrm1	negative regulator of MBF	2.68371	0.129907
SPAC17H9.19c	cdt2	DNA replication initiation: WD repeat protein Cdt2	2.66464	0.182872
SPBC12D12.08c	ned8	ubiquitin-like modifier Ned8	2.65272	0.0329283
SPBC577.02	rpl3801	60S ribosomal protein L38	2.54513	0.0253869
SPBC1685.09	rps29	40S ribosomal protein S29	2.50311	0.260334
SPCC1442.01	ste6	guanyl-nucleotide exchange factor activity	2.50054	0.299879
SPAC13G6.04	tim8	TIM22 inner membrane protein import complex subunit Tim8	2.4497	0.098772
SPBC2D10.19c	0	pre-60S ribosome shuttling factor (predicted)	2.44082	0.163534
SPBC3D6.15	rps2501	40S ribosomal protein S25	2.43942	0.270605
SPAC694.05c	rps2502	40S ribosomal protein S25	2.39764	0.191119
SPAC2F3.17c	lsm6	mRNA splicing: U6 snRNP-associated protein	2.39164	0.141522
SPBC405.07	rpl3602	60S ribosomal protein L36	2.3702	0.138754
SPAC15E1.03	rpl36a	60S ribosomal protein L36/L42	2.36356	0.281087
SPBC1289.05c	vma10	V-type ATPase	2.35235	0.119047
SPAPB17E12.05	rpl3703	60S ribosomal protein L37	2.34733	0.0915753
SPAC4H3.12c	0	dubious ORF (sequence orphan)	2.31173	0.297379
SPBC83.02c	rpl4302	60S ribosomal protein L37a	2.29062	0.0651184
SPCC1442.08c	cox12	aerobic respiration: cytochrome c oxidase subunit VIb	2.25285	0.291823
SPCP1E11.09c	rpp103	60S acidic ribosomal protein	2.23332	0.297491
SPAC23C4.11	atp18	F-type ATPase subunit J	2.22982	0.185098
SPAC1705.02	0	conserved hypothetical: human 4F5S homolog	2.21912	0.271332
SPBC800.04c	rpl4301	60S ribosomal protein L37a	2.2159	0.0773932
SPAC19B12.09	srp14	signal recognition particle subunit Srp14	2.21171	0.329543
SPAC644.05c	0	deoxyuridine 5'-triphosphate nucleotidohydrolase	2.21009	0.0566353
SPBC14C8.07c	cdc18	DNA replication initiation: MCM loader	2.20752	0.192776
SPAC1556.05c	0	rRNA processing: CGR1 family	2.18005	0.141806
SPAC1F7.05	cdc22	ribonucleoside reductase large subunit Cdc22	2.15831	0.140004
SPCC970.05	rpl3601	60S ribosomal protein L36	2.14868	0.198982
SPCC285.15c	rps2802	40S ribosomal protein S28	2.11464	0.102498
SPAC823.02	0	sequence orphan	2.11451	0.162155
SPAC1B3.20	0	sequence orphan	2.05492	0.128736
SPAC24C9.16c	cox8	aerobic respiration: cytochrome c oxidase subunit VIII	2.05086	0.354629
SPCC553.07c	0	DinB translesion DNA repair polymerase	2.04481	0.21182
SPBC3E7.07c	0	conserved hypothetical: DUF757 family protein	2.03537	0.355965
SPBC4B4.05	smg1	mRNA splicing: Sm snRNP core protein	1.98323	0.174738
SPAC222.03c	tim10	Tim9-Tim10 complex subunit Tim10	1.93663	0.0646384
SPBC19C2.14	smd3	mRNA splicing: Sm snRNP core protein	1.92255	0.149272
SPBC19C2.03	rpc10	DNA-directed RNA polymerase I, II and III subunit Rpc10	1.91887	0.192939
SPAP14E8.02	tos4	homolog of S. cerevisiae Tos4 (SBF)	1.89045	0.33863
SPBC1773.12	0	transcription factor	1.85039	0.31628
SPAC17C9.09c	tim13	TIM22 inner membrane protein import complex subunit Tim13	1.80616	0.151547
SPAC3A11.13	0	prefoldin subunit 6	1.72903	0.370629
SPBC4F6.08c	mrpl39	mitochondrial ribosomal protein subunit L39	1.70757	0.337669
SPBC31E1.03	hub1	mRNA splicing: ubiquitin-like protein modifier Hub1	1.69651	0.170416
SPAC806.03c	rps2601	40S ribosomal protein S26	1.68762	0.214253
SPBC31F10.15c	atp15	F0-ATPase epsilon subunit	1.6676	0.0281467
SPBPB2B2.01	0	amino acid permease family	1.66087	0.0149198
SPBC19F8.02	0	conserved hypothetical: nuclear distribution protein NUDC homolog	1.65839	0.296961
SPBC21B10.12	rec6	meiotic recombination protein Rec6	1.63771	0.07745
SPAC4F10.14c	btf3	nascent polypeptide-associated complex	1.61795	0.259549
SPCC290.04	ams2	cell cycle regulated GATA-type transcription factor Ams2	1.6113	0.30263
SPBC23G7.15c	rpp202	60S acidic ribosomal protein	1.60242	0.318739
SPCP31B10.08c	rpl35a	60S ribosomal protein L35a	1.58474	0.396359
SPAC16A10.05c	dad1	DASH complex subunit Dad1	1.56892	0.0682059
SPBC146.08c	0	translation initiation factor	1.56605	0.369568
SPAC18B11.08c	0	conserved yeast protein	1.56255	0.361037
SPBC106.05c	tim11	F0-ATPase subunit E	1.55654	0.0856713
SPAC19B12.04	rps3001	40S ribosomal protein S30	1.55556	1.86903
SPAC6G10.11c	ubi3	ribosomal-ubiquitin fusion protein	1.54795	0.173052
SPBC3B9.05	0	helper of TIM	1.54385	0.063736
SPBC56F2.14	mrpl44	mitochondrial ribosomal protein subunit l44	1.53876	0.200178
SPBC3B9.13c	rpp102	60S acidic ribosomal protein	1.53127	0.270199
SPCC24B10.09	rps1702	40S ribosomal protein S17	1.5311	0.321988
SPBC18E5.06	rps21	40S ribosomal protein S21	1.52822	0.117344
SPAC222.04c	ies6	chromatin remodeling complex subunit	1.52445	0.211728
SPBC1539.06	0	acyl-coenzyme A binding protein	1.52276	0.126792
SPCC16A11.05c	dim1	mRNA splicing: U4/U6 x U5 tri-snRNP complex subunit Dim1	1.51849	0.0516647
SPBC428.18	cdt1	DNA replication initiation: replication licensing factor Cdt1	1.51437	0.100728
SPAC1687.06c	rpl44	60S ribosomal protein L28/L44	1.47753	0.472104
SPAC589.10c	0	ribosomal-ubiquitin fusion protein	1.47275	0.56379
SPBC2G2.03c	sbh1	translocon beta subunit Sbh1	1.46699	0.121685
SPBC16C6.11	rpl3201	60S ribosomal protein L32	1.46389	0.117808
SPAC3H5.10	rpl3202	60S ribosomal protein L32	1.46038	0.156567
SPAC31A2.13c	sft1	SNARE	1.42275	0.125322
SPBC1685.10	rps27	40S ribosomal protein S27	1.41099	0.400391
SPAC3G6.02	dss1	mRNA export protein Dss1	1.39912	0.173914
SPAC10F6.09c	psm3	mitotic cohesin complex subunit Psm3	1.39405	0.20479
SPAC31G5.21	0	conserved hypothetical: human family 32A homolog	1.3849	0.142827
SPCC1223.05c	rpl3702	60S ribosomal protein L37	1.36859	1.49891
SPBC6B1.12c	0	SAGA complex subunit	1.36718	0.0454482
SPAC227.05	0	prefoldin subunit 4	1.36617	0.117073
SPAC644.14c	rhp51	telomere maintenance: recombinase Rhp51	1.33368	0.00753105
SPAC3H1.03	mug151	mouse transcriptional regulator, HCNGP-like (predicted)	1.32479	0.0545926
SPBC215.02	bob1	prefoldin subunit 5	1.31991	0.203864
SPAPB2B4.03	cig2	G1/S transition: cyclin	1.31822	0.139119
SPBC887.08	0	sequence orphan	1.31793	0.119362
SPAC27D7.07c	smd1	mRNA splicing: Sm snRNP core protein Smd1	1.31403	0.470556
SPAC4H3.06	0	sequence orphan	1.30492	0.101441
SPBC16H5.15	0	conserved fungal protein	1.30133	0.283304
SPAC23C4.04c	0	sequence orphan	1.2946	0.230447
SPAC9G1.03c	rpl3001	60S ribosomal protein L30	1.2911	0.142464
SPAC4F10.20	grx1	oxidative stress response/redox homeostasis: glutaredoxin	1.28789	0.17422
SPBC1105.17	cnp1	centromere silencing: CENP-A	1.2815	0.0825377
SPCC1259.05c	cox9	aerobic respiration: cytochrome c oxidase subunit VIIa	1.2802	0.10601
SPCC24B10.05	tim9	Tim9-Tim10 complex subunit Tim9	1.27848	0.056766
SPBC887.07	mrpl38	mitochondrial ribosomal protein subunit L38	1.25864	0.13167
SPBC17G9.07	rps2402	40S ribosomal protein S24	1.23092	0.266573
SPAC19A8.09	0	ER to Golgi transprot protein	1.22986	0.0438854
SPBC776.16	0	sequence orphan (spindle pole body)	1.22758	0.221014
SPBC20F10.09	lsm5	rRNA processing/mRNA splicing: U6 snRNP-associated protein	1.22687	0.371082
SPBC11G11.06c	sme1	mRNA splicing: Sm snRNP core protein Sme1	1.22277	0.182783
SPBC1921.01c	rpl3701	60S ribosomal protein L37	1.20051	0.229741
SPBC1347.01c	rev1	DNA replication: deoxycytidyl transferase	1.19315	0.126692
SPBC1709.20	pop8	rRNA/tRNA processing: RNase P and RNase MRP subunit	1.18527	0.110325
SPBC11B10.10c	pht1	histone H2A variant	1.18398	0.125805
SPBC685.07c	rpl2701	60S ribosomal protein L27	1.16841	0.28115
SPAC1782.07	qcr8	aerobic respiration: ubiquinol-cytochrome-c reductase complex subunit 7	1.1607	0.47256
SPAC3H8.07c	0	prefoldin subunit 3	1.15995	0.0044145
SPAC23H4.18c	rbx1	RING-box protein 1	1.15522	0.2399
SPAC6B12.06c	0	conserved fungal protein	1.15071	0.267508
SPBC336.12c	cdc10	G1/S transition: MBF transcription factor complex subunit Cdc10	1.15067	0.183333
SPBC337.08c	ubi4	ubiquitin	1.14937	0.19107
SPBC32C12.03c	ppk25	serine/threonine protein kinase	1.14487	0.797844
SPBC106.18	rpl2501	60S ribosomal protein L25	1.13777	0.192137
SPAC890.08	rpl31	60S ribosomal protein L31	1.13312	0.0832809
SPAC15F9.03c	nxt2	NTF2 domain	1.12814	0.177379
SPBP4H10.13	rps2302	40S ribosomal protein S23	1.12098	0.117954
SPBC29A10.12	0	HMG-box variant (predicted): transcription	1.11901	0.194628
SPAC2C4.03c	smd2	mRNA splicing: Sm snRNP core protein Smd2	1.11818	0.188956
SPBC887.14c	pfh1	DNA replication: pif1 helicase homolog Pfh1	1.11616	0.0900324
SPBC4F6.04	rpl2502	60S ribosomal protein L25	1.10945	0.0809329
SPAC23C11.02c	rps23	40S ribosomal protein S23	1.1071	0.31002
SPCC663.13c	0	N-acetyltransferase	1.09961	0.180006
SPAC23C4.09c	0	DNA binding protein	1.09239	0.160418
SPCC1672.04c	0	mitochondrial copper ion transport protein	1.0916	0.0781169
SPAC926.05c	0	zinc finger protein	1.08811	0.3145
SPCC1322.11	rpl2302	60S ribosomal protein L23	1.08772	0.103972
SPAC1556.07	pmm1	phosphomannomutase	1.08542	0.0283318
SPBC32F12.15	tfb5	transcription factor TFIIH complex subunit Tfb5	1.07331	0.0704496
SPAC1F8.06	fta5	Sim4 and Mal2 associated	1.06364	0.0685728
SPAC8E11.07c	alp31	tubulin specific chaperone	1.04849	0.119105
SPAC29B12.13	0	carbon-sulfur lyase (predicted)	1.03432	0.412374
SPBC21C3.13	rps1901	40S ribosomal protein S19	1.02827	0.322844
SPAC22H10.13	zym1	zinc ion homeostasis: metallothionein	1.02625	0.219654
SPAC11E3.04c	ubc13	ubiquitin conjugating enzyme	1.02062	0.142028
SPBP8B7.06	rpp201	60S acidic ribosomal protein	1.0199	0.266642
SPAC4F8.05c	mrpl28	mitochondrial ribosomal protein subunit L28	1.01801	0.272228
SPBC30D10.12c	rsm27	mitochondrial ribosomal protein subunit S27	1.01549	0.237073
SPBC2D10.16	0	CENP-S homolog (predicted)	1.00971	0.166354
SPAC644.15	rpp101	60S acidic ribosomal protein	1.00862	0.509163
SPBC1198.02	dea2	adenine deaminase Dea2	0.997516	0.141894
SPAC607.03c	snu13	rRNA processing/mRNA splicing: U3 snoRNP-associated protein	0.99438	0.114725
SPAC607.02c	0	conserved fungal protein	0.987766	0.122652
SPCC23B6.02c	0	lysine-rich protein	0.983049	0.111162
SPBC660.13c	ssb1	DNA replication: DNA replication factor A subunit Ssb1	0.980606	0.282743
SPBC1718.02	hop1	horma domain protein	0.974621	0.073634
SPAP27G11.13c	nop10	rRNA processing: small nuclear ribonucleoprotein	0.969481	0.271612
SPBC1677.02	dpm3	phospholipid biosynthesis: dolichol-phosphate mannosyltransferase subunit 3	0.962842	0.161111
SPCC330.14c	rpl2402	60S ribosomal protein L24	0.961875	0.101776
SPAC11E3.15	rpl22	60S ribosomal protein L22	0.961492	0.322351
SPAC806.11	0	dubious ORF	0.958093	0.184996
SPAC1751.02c	rsm19	mitochondrial ribosomal protein subunit S19	0.957277	0.18038
SPAC959.08	rpl2102	60S ribosomal protein L21	0.954302	0.24399
SPAC17H9.18c	0	dubious ORF	0.950209	0.303241
SPAC6G9.01c	0	conserved hypothetical	0.948305	0.269503
SPBC947.04	pfl3	glycoprotein	0.940317	0.0228366
SPAC977.15	0	conserved hypothetical: dienelactone hydrolase family	0.931444	0.0594092
SPAC57A10.06	mug15	sequence orphan	0.93036	0.140557
SPAC4A8.15c	cdc3	actin cortical patch: profilin	0.922538	0.457795
SPAC4F10.12	fta1	Sim4 and Mal2 associated	0.91948	0.443764
SPBC16C6.08c	qcr6	ubiquinol-cytochrome-c reductase complex subunit 8	0.915486	0.225563
SPAC8F11.02c	0	zinc finger protein	0.91117	0.219609
SPAC23H3.07c	mrp2	mitochondrial ribosomal protein subunit S14	0.909719	0.138453
SPCC736.09c	0	TRAX	0.906009	0.23834
SPAC1002.07c	ats1	N-acetyltransferase Ats1	0.905941	0.220015
SPBC4C3.04c	0	guanyl-nucleotide exchange factor activity	0.904288	0.225431
SPBC1718.03	ker1	RNA polymerase I transcription factor subunit Ker1	0.901759	0.38786
SPBC29B5.03c	rpl26	60S ribosomal protein L26	0.89017	0.248274
SPBC119.18	0	mitochondrial distribution and morphology protein Mdm35	0.890112	0.19217
SPCC338.04	cid2	caffeine induced death protein Cid2: mitochondrion	0.885044	0.127503
SPAC26F1.02	0	conserved hypothetical: pinin homologue	0.875764	0.161648
SPAC2F7.05c	0	translation initiation factor eIF5	0.867546	0.364111
SPAC57A10.03	cyp1	cyclophilin	0.863767	0.222663
SPAC3G9.03	rpl2301	60S ribosomal protein L23	0.862454	0.0667442
SPBC8E4.04	0	aldo/keto reductase	0.859788	0.325794
SPCC965.07c	gst2	oxidative stress response: glutathione S-transferase	0.85895	0.116312
SPBC1198.03c	0	sequence orphan (cell tip/septum localization)	0.858161	0.211878
SPBC2G2.16	0	mannose-6-phosphate isomerase	0.851285	0.0733636
SPBC3B9.07c	rpa43	DNA-directed RNA polymerase I complex subunit Rpa43	0.843189	0.251194
SPBC119.02	ubc4	ubiquitin conjugating enzyme	0.840458	0.254838
SPCC962.04	rps1201	40S ribosomal protein S12	0.832305	0.184836
SPAC6G9.11	syb1	synaptobrevin	0.832299	0.103264
SPAC1783.08c	rpl1502	60S ribosomal protein L15b	0.826937	0.263343
SPAC23A1.08c	rpl3401	60S ribosomal protein L34	0.822875	0.164076
SPAC11E3.03	pcs1	DNA replication: monopolin complex component	0.817717	0.0806501
SPCC285.12	lsm7	mRNA splicing: U6 snRNP-associated protein	0.815853	0.279751
SPAC13G7.09c	0	sequence orphan	0.81476	0.158701
SPAC30C2.03	0	sequence orphan	0.814509	0.0403471
SPAC22G7.03	0	sequence orphan	0.8102	0.277827
SPAC7D4.05	0	hydrolase	0.808408	0.305055
SPBC1D7.01	0	prefoldin subunit 1	0.80591	0.125352
SPBC1778.08c	arc3	actin cortical patch: ARP2/3 actin-organizing complex subunit Arc21	0.805876	0.0942827
SPCC965.14c	0	cytosine deaminase	0.80462	0.0964131
SPBC23E6.06c	0	vitamin metabolism: 3,4-Dihydroxy-2-butanone 4-phosphate synthase	0.801404	0.0634948
SPBP4H10.08	qcr10	ubiquinol-cytochrome-c reductase complex subunit Qcr10	0.801134	0.132142
SPAC15A10.12c	0	TRAPP complex subunit subunit2-like (predicted): ER-golgi vesicle transport	0.799345	0.322078
SPCC1919.08c	mrpl33	mitochondrial ribosomal protein subunit YmL33	0.797405	0.717244
SPBC409.14c	mrps17	mitochondrial ribosomal protein subunit S17	0.796929	0.17297
SPBC4B4.11	0	mitochondrial protein	0.794586	0.295655
SPCC777.17c	0	mitochondrial ribosomal protein	0.791967	0.270369
SPAC694.06c	mrc1	DNA replication initiation: mediator of replication checkpoint 1	0.791586	0.108642
SPAC1486.08	0	mitochondrial inner membrane protein	0.790815	0.155074
SPAC4H3.13	0	transcription factor Pcc1 (predicted)	0.786085	0.012424
SPAC922.04	0	sequence orphan	0.784486	0.263462
SPCC1235.07	fta7	Sim4 and Mal2 associated	0.783697	0.237048
SPAPB17E12.13	rpl1802	60S ribosomal protein L18	0.783415	0.0498798
SPBC31F10.17c	0	sequence orphan	0.781914	0.06153
SPCC24B10.21	tpi1	glycolysis: triosephosphate isomerase	0.777958	0.0366675
SPCC417.15	0	dubious ORF	0.777587	0.220719
SPAC26A3.17c	0	N-methyltransferase	0.774959	0.149462
SPBC29A3.07c	0	mRNA splicing: U2 snRNP-associated protein Sf3b14 homolog (predicted)	0.774516	0.0520182
SPAC664.04c	rps1602	40S ribosomal protein S16	0.774279	0.254014
SPBC1306.01c	0	translation elongation factor G	0.772745	0.0647439
SPBC1271.13	mrpl8	mitochondrial ribosomal protein subunit L8	0.771546	0.0894023
SPBC660.14	mik1	DNA replication initiation: mitotic inhibitor kinase Mik1	0.771406	0.335869
SPCC4B3.09c	0	mitochondrial ribosomal protein subunit L12	0.76414	0.0464654
SPAC1071.08	rpp203	60S acidic ribosomal protein	0.760389	0.0206024
SPAC30D11.13	hus5	SUMO conjugating enzyme	0.760168	0.0705664
SPAC5D6.01	rps2202	40S ribosomal protein S15a	0.759806	0.0593442
SPAC2G11.08c	smn1	mRNA splicing: SMN family	0.756217	0.0950084
SPBC1773.07c	sbp1	RanBP1	0.756086	0.0216993
SPAC11H11.05c	fta6	Sim4 and Mal2 associated	0.755119	0.163785
SPCC2H8.04	0	sequence orphan	0.75373	0.144121
SPAC5D6.05	38971	mediator complex subunit Pmc6	0.749535	0.0352689
SPBC2D10.15c	0	peptidyl-tRNA hydrolase	0.748167	0.0399107
SPAC19D5.02c	0	peroxisomal membrane protein Pex22	0.747126	0.0462651
SPCC330.05c	ura4	orotidine 5'-phosphate decarboxylase Ura4	0.745429	0.114838
SPAC2H10.02c	0	PDZ domain protein	0.74514	0.269926
SPAC20G4.06c	adf1	actin cortical patch: cofilin	0.743083	0.116175
SPBC1709.07	erg27	ergosterol biosynthesis: 3-keto sterol reductase	0.743057	0.237835
SPAC7D4.02c	0	conserved hypothetical: src (SH3) homology domain protein	0.740572	0.194537
SPBC1289.07c	rpc40	DNA-directed RNA polymerase I and III subunit Rpc40	0.73538	0.107449
SPCC777.11	0	sequence orphan (mitochondrion)	0.734925	0.16505
SPAC227.16c	0	DNA replication initiation: GINS complex subunit Psf3	0.733831	0.429756
SPAC6F12.07	tom20	mitochondrial TOM complex subunit Tom20	0.733478	0.139224
SPBC16H5.04	0	mitochondrial membrane protein	0.733355	0.356795
SPBC1539.10	0	ribosome biogenesis protein	0.73148	0.0761025
SPBC15D4.06	0	NatC N-acetyltransferase complex catalytic subunit	0.729143	0.150692
SPAC8C9.10c	0	ribosome biogenesis protein Rrp14-N (predicted)	0.728032	0.0180872
SPCC1393.03	rps1501	40S ribosomal protein S15	0.727028	0.187082
SPAC17C9.15c	0	sequence orphan	0.723972	0.0970191
SPAC1F12.09	gpi17	phospholipid biosynthesis: pig-S	0.722789	0.197314
SPBC27B12.02	0	sequence orphan	0.721022	0.166639
SPAC6B12.05c	0	chromatin remodeling complex subunit	0.719707	0.315615
SPBC19C2.15c	0	phosphoprotein phosphatase	0.719348	0.00134664
SPCC4B3.16	tip41	TIP41-like type 2a phosphatase regulator Tip41	0.718181	0.266287
SPAC17H9.14c	0	oxidative stress response/redox homeostasis: protein disulfide isomerase	0.7145	0.559403
SPBP19A11.01	0	glycine decarboxylase complex subunit H	0.714011	0.195393
SPAC328.10c	rps502	40S ribosomal protein	0.71107	0.0095188
SPAC2C4.16c	rps801	40S ribosomal protein	0.708808	0.312745
SPBC4F6.18c	arf1	ADP-ribosylation factor	0.708442	0.128816
SPAC11D3.02c	0	ELLA family protein	0.708442	0.21968
SPBC13G1.12	did2	late endosome to vacuole transport: SNF7 family class E vps	0.707149	0.0393441
SPAC4F8.01	did4	late endosome to vacuole transport: SNF7 family class E vps	0.704569	0.125867
SPBC1604.10	srb7	mediator complex subunit Srb7	0.702898	0.104373
SPBP4H10.21c	sld5	DNA replication initiation: GINS complex subunit Sld5	0.702144	0.164166
SPAC17G6.06	rps2401	40S ribosomal protein S24	0.701869	0.0738697
SPBC365.11	0	GRIP domain	0.701334	0.110948
SPAC1B3.12c	rpb10	DNA-directed RNA polymerase I, II, and III subunit Rpb10	0.700701	0.127764
SPBC660.12c	0	peptide epimerase	0.699012	0.211269
SPBC56F2.12	ilv5	amino acid/isoleucine synthesis: acetohydroxyacid reductoisomerase	0.698982	0.296272
SPBC649.02	rps1902	40S ribosomal protein S19	0.698918	0.00629446
SPAC644.10	med11	mediator complex subunit Med11 (predicted)	0.695636	0.139105
SPBC577.03c	0	N-acetyltransferase	0.694484	0.0931606
SPCC297.06c	0	mitochondrial ribosomal protein subunit 8	0.693789	0.0876791
SPAPB2B4.06	0	conserved fungal protein	0.691708	0.0143535
SPBC14F5.01	0	sequence orphan	0.691149	0.206468
SPAC12G12.05c	taf9	transcription initiation factor Taf9	0.690404	0.00471458
SPBC19C7.01	0	mRNA splicing: Mago binding protein homolog; same as SPBC32F12.13c	0.684318	0.046655
SPAC5H10.05c	0	NADHdh_2 domain protein	0.678724	0.136136
SPBC1921.07c	0	SAGA complex associated protein	0.678233	0.0661621
SPAC1142.05	ctr5	copper transporter complex subunit Ctr5	0.678151	0.0121095
SPBC31F10.12	0	PUA domain	0.678047	0.0743274
SPBC29A3.05	0	zinc finger protein	0.677546	0.0396385
SPBC1347.13c	0	rRNA processing: ribose methyltransferase	0.676655	0.242368
SPAC18B11.09c	0	acetyltransferase	0.67508	0.117619
SPAC1D4.01	0	sequence orphan	0.674299	0.206797
SPBP23A10.02	pkr1	V-ATPase assembly factor Pkr1 (predicted)	0.673843	0.357472
SPAC1805.11c	rps2602	40S ribosomal protein S26	0.673651	0.152714
SPAC2F7.14c	0	rRNA processing: exosome subunit Rrp4 (predicted)	0.672674	0.175068
SPAC5H10.03	0	phosphoglycerate mutase family	0.671039	0.0405174
SPBC2A9.08c	sec22	SNARE	0.67047	0.262043
SPBC9B6.05c	lsm3	rRNA processing/mRNA splicing: U6 snRNP-associated protein	0.670124	0.237142
SPAC23H4.03c	erv25	COPII-coated vesicle component	0.669725	0.141336
SPBC947.14c	0	sequence orphan	0.668501	0.136866
SPBC1861.01c	cnp3	CENP-C	0.668248	0.148313
SPBC24C6.05	sec28	late endosome to vacuole transport: coatomer epsilon subunit	0.664441	0.11147
SPBC1778.03c	0	vitamin metabolism: NADH pyrophosphatase	0.662666	0.0968786
SPBP8B7.03c	rpl402	60S ribosomal protein L2	0.661811	0.103668
SPAC1D4.07c	0	dubious ORF	0.660824	0.0193972
SPBC3B9.14c	mrpl3	mitochondrial ribosomal protein subunit L3	0.658798	0.324298
SPCC1827.03c	0	acetyl-CoA ligase	0.65861	0.209625
SPAC57A10.11c	tim40	TIM22 inner membrane protein import complex subunit Tim40	0.657223	0.022396
SPAPB15E9.03c	Tf2-5	transposable element	0.656648	0.219683
SPCC576.11	rpl15	60S ribosomal protein L15	0.655772	0.256635
SPCC330.19c	0	sequence orphan	0.655459	0.113295
SPAC17G6.07c	0	SNARE	0.655374	0.097455
SPAC3H1.08c	0	conserved hypothetical: DUF1640 family protein	0.655009	0.102461
SPCC576.09	rps20	40S ribosomal protein S20	0.654942	0.269715
SPAC227.08c	yth1	mRNA polyadenylation: zinc finger protein	0.652561	0.19906
SPBC18H10.12c	rpl701	60S ribosomal protein L7	0.652521	0.016681
SPAC3C7.14c	obr1	ubiquitinated histone-like protein Uhp1	0.651898	0.237489
SPBC16C6.05	0	translation initiation factor	0.650145	0.128455
SPBC16D10.11c	rps1801	40S ribosomal protein S18	0.650112	0.292693
SPAC26A3.04	rpl2002	60S ribosomal protein L20	0.649202	0.24585
SPAC4F10.19c	0	zinc finger protein	0.645904	0.213618
SPAC1F5.05c	0	sequence orphan	0.642312	0.0750924
SPAC25H1.08c	0	WD repeat protein	0.642008	0.272048
SPBP8B7.12c	fta3	Sim4 and Mal2 associated	0.641252	0.151839
SPAP8A3.10	0	mitochondrial intermembrane space protein sorting protein (predicted)	0.638611	0.093487
SPAC688.06c	slx4	DNA replication: structure-specific endonuclease	0.638294	0.151071
SPBC409.03	swi5	Swi5 protein	0.63825	0.219538
SPAC1420.03	rpn501	19S proteasome regulatory subunit Rpn501	0.636535	0.04972
SPAC3A12.11c	cwf2	mRNA splicing: RNA-binding protein	0.635165	0.141649
SPAC4D7.04c	0	cis-prenyltransferase	0.634929	0.360014
SPBC24C6.03	0	proline-tRNA ligase	0.634894	0.149261
SPBPB2B2.05	0	GMP synthase [glutamine-hydrolyzing]	0.634745	0.0701626
SPAC227.10	0	prefoldin subunit 2	0.634694	0.17815
SPAPB24D3.08c	0	NADP-dependent oxidoreductase	0.634484	0.246811
SPAC167.04	pam17	presequence translocase-associated motor subunit Pam17	0.633769	0.207951
SPBC1E8.04	Tf2-10-pseudo	transposable element	0.631495	0.0655326
SPBP4H10.20	nhm1	m7G(5')pppN diphosphatase (predicted): deadenylation-dependent decapping and decay of mRNA	0.631484	0.0588503
SPAC607.05	rpn9	19S proteasome regulatory subunit	0.631441	0.404963
SPAC23H3.02c	ini1	mRNA splicing: RING finger-like protein	0.630601	0.285302
SPBC1105.12	h4.3	histone H4	0.630434	0.362492
SPAC23H4.11c	cnl2	centromere localized protein	0.627398	0.0847229
SPBC36.05c	clr6	centromere silencing: histone deacetylase	0.626595	0.195556
SPBC4C3.07	0	translation initiation factor eIF3f	0.626433	0.148338
SPAC644.04	pct1	RNA 5'-triphosphatase	0.625887	0.0487571
SPAC26F1.06	gpm1	glycolysis: monomeric 2,3-bisphosphoglycerate	0.62407	0.211517
SPAC6C3.08	0	gankyrin	0.623729	0.0452103
SPBC428.16c	rhb1	Rheb GTPase Rhb1	0.623008	0.103032
SPBC2G2.04c	mmf1	YjgF family protein Mmf1: mitochondria genome maintenance	0.622915	0.143184
SPAC15E1.09	grx2	oxidative stress response/redox homeostasis: glutaredoxin	0.622902	0.0906634
SPBC9B6.02c	Tf2-9	transposable element	0.622283	0.174167
SPAC20G4.01	caf16	CCR4-Not complex subunit	0.62107	0.0362027
SPAC22A12.04c	rps2201	40S ribosomal protein S15a	0.620304	0.25235
SPBC2D10.18	abc1	aerobic respiration: ABC1 family	0.618808	0.22253
SPAC521.05	rps802	40S ribosomal protein S8	0.61802	0.164919
SPBC19C2.08	prp38	mRNA splicing: U4/U6 x U5 tri-snRNP complex subunit Prp38	0.616988	0.196627
SPAC56F8.11	spc3	signal peptidase subunit	0.616151	0.0280464
SPBC17D11.03c	0	conserved fungal protein	0.61232	0.0729848
SPAC8C9.08	rps5	40S ribosomal protein S5	0.612272	0.435033
SPBC23G7.05	sui1	translation initiation factor eIF1	0.611817	0.0398895
SPBP16F5.05c	0	ankyrin repeat protein	0.611146	0.113382
SPCC1494.02c	taf13	transcription factor TFIID complex subunit Taf13	0.608244	0.406242
SPBC776.18c	pmh1	transcription factor TFIIH complex subunit Pmh1	0.605632	0.141178
SPAPB8E5.02c	rpn502	19S proteasome regulatory subunit Rpn502	0.604852	0.0397569
SPBC11G11.04	trs20	TRAPP	0.604315	0.180789
SPBC3H7.08c	0	conserved fungal protein	0.603853	0.0731224
SPAC16A10.06c	nse2	DNA replication: Smc5-6 complex non-SMC subunit 2	0.603439	0.161108
SPAC22A12.13	0	phospholipid biosynthesis: pig-P	0.603067	0.198124
SPBC21B10.08c	0	sequence orphan	0.600947	0.150948
SPAC821.05	0	translation initiation factor eIF3h	0.597953	0.163136
SPAC6G9.09c	rpl24	60S ribosomal protein L24	0.597135	0.0807659
SPAC3G6.08	erv1	iron ion homeostasis: sulfhydryl oxidase	0.593954	0.152023
SPAC24C9.04	0	sequence orphan	0.593917	0.0777759
SPBC725.17c	rrn11	RNA polymerase I component	0.59352	0.00151886
SPAC15A10.03c	rhp54	DEAD/DEAH box helicase	0.591438	0.347959
SPAC890.07c	rmt1	type I ribosomal protein arginine N-methyltransferase Rmt1	0.590518	0.0575858
SPBC21B10.06c	0	sequence orphan	0.589551	0.0654068
SPBC19C2.07	fba1	glycolysis: fructose-bisphosphate aldolase Fba1	0.588925	0.071604
SPAC458.02c	0	mRNP complex	0.585756	0.126941
SPBC119.01	rpn3	19S proteasome regulatory subunit	0.585158	0.175611
SPBC12D12.07c	trx2	oxidative stress response/redox homeostasis: thioredoxin Trx2	0.58459	0.0980112
SPBC337.16	cho1	phospholipid biosynthesis: phosphatidyl-N-methylethanolamine N-methyltransferase	0.584584	0.123546
SPCC74.05	rpl2702	60S ribosomal protein L27	0.584292	0.34006
SPBC18H10.13	rps1402	40S ribosomal protein S14	0.584042	0.462072
SPAC8C9.17c	spc34	DASH complex subunit Spc34	0.583824	0.114593
SPAC29A4.15	0	serine-tRNA ligase	0.582394	0.255578
SPAC3F10.03	0	glycine tRNA-ligase	0.581821	0.40061
SPCC1020.14	Tf2-12	transposable element	0.581156	0.13562
SPCC338.12	0	protease inhibitor	0.58079	0.0139032
SPBC577.10	0	20S proteasome component	0.580616	0.155514
SPAC26A3.13c	Tf2-4	transposable element	0.580319	0.136718
SPAC2C4.10c	0	sequence orphan	0.578972	0.101211
SPBC3B9.21	dcp1	mRNA decapping complex subunit Dcp1	0.578447	0.0755829
SPAC1610.01	0	conserved hypothetical	0.577627	0.170499
SPCC576.08c	rps2	40S ribosomal protein S2	0.577391	0.105285
SPBC16A3.16	0	mitochondrial inner membrane protein	0.574844	0.386967
SPBC21B10.04c	nrf1	cell polarity: GTPase regulator	0.574737	0.127919
SPBC16H5.09c	0	glycosyl transferase family 15	0.574095	0.415216
SPBC16E9.09c	0	emp24 family	0.573236	0.163156
SPBC56F2.02	rpl1901	60S ribosomal protein L19	0.572931	0.279816
SPAC4H3.09	0	fatty acid biosynthesis: mitochondrial type II fatty acid synthase component	0.572234	0.362711
SPBC2D10.10c	fib1	rRNA processing: fibrillarin	0.572184	0.153868
SPAC694.03	0	conserved fungal protein	0.571914	0.253335
SPBC2G2.05	rpl1603	60S ribosomal protein L13/L16	0.570498	0.133897
SPCC1183.08c	rpl101	60S ribosomal protein L10a	0.570027	0.130766
SPAC1071.07c	rps1502	40S ribosomal protein S15	0.569824	0.168826
SPAC144.14	klp8	microtubule movement: kinesin-like protein	0.568872	0.100469
SPBC409.06	uch2	ubiquitin C-terminal hydrolase activity	0.568327	0.0822279
SPAC1F3.04c	0	DUF367	0.568101	0.0617697
SPAC6C3.09	0	RNase P subunit (predicted)	0.568071	0.120652
SPCC576.14	0	diphthine synthase	0.568041	0.0306142
SPAC11G7.04	ubi1	ribosomal-ubiquitin fusion protein	0.567339	0.0322514
SPBC18E5.13	0	translation initiation factor	0.566986	0.127607
SPBC13G1.07	0	palmitoyltransferase	0.565478	0.021405
SPCC1494.11c	Tf2-13-pseudo	retrotransposable element: pseudogene	0.565155	0.10423
SPCC569.08c	ade5	glycinamide ribonucleotide transformylase	0.565067	0.0690973
SPAC890.05	0	G-patch domain	0.564363	0.187348
SPAC323.02c	0	20S proteasome component	0.563133	0.181871
SPBC30B4.02c	0	mRNA splicing: R3H domain	0.562784	0.153045
SPCP1E11.07c	cwf18	mRNA splicing: complexed with Cdc5 protein	0.562665	0.134125
SPAC222.16c	csn3	COP9/signalosome complex subunit Csn3	0.561196	0.345233
SPAC22F3.07c	atp20	ATP synthase	0.560722	0.321454
SPAC6B12.11	drc1	DNA replication initiation: DNA replication protein Drc1	0.560407	0.118902
SPAC17H9.13c	0	glutamate 5-kinase	0.558882	0.127629
SPAC823.04	0	rRNA processing: DUF947 family (predicted)	0.558256	0.1425
SPAC922.03	0	1-aminocyclopropane-1-carboxylate deaminase	0.555924	0.368448
SPCC576.03c	tpx1	oxidative stress response/redox homeostasis: thioredoxin peroxidase Tpx1	0.555657	0.0121503
SPCC63.07	0	tRNA guanylyltransferase	0.555503	0.142033
SPAC140.03	arb1	RNA interference/centromere silencing: argonaute binding protein 1	0.555253	0.114662
SPBC409.12c	0	sequence orphan	0.554224	0.00976581
SPCC613.05c	rpl35	60S ribosomal protein L35	0.552029	0.192549
SPAC926.07c	dlc2	microtubule movement: dynein light chain	0.551788	0.256422
SPBC3B9.17	isa2	iron ion homeostasis: iron-sulfur protein	0.551602	0.327272
SPAC9.06c	0	conserved hypothetical: adducin	0.548308	0.0462263
SPBC336.10c	tif512	translation initiation factor	0.548142	0.157402
SPAC1002.10c	sgt1	SGT1 protein family protein	0.548093	0.0212194
SPAC23G3.11	rpn6	19S proteasome regulatory subunit	0.546439	0.175651
SPBC28F2.07	sfr1	Swi five-dependent recombination repair protein Sfr1	0.545293	0.029254
SPACUNK4.11c	0	sequence orphan: belongs to M-phase phosphoprotein 6 family	0.545126	0.220045
SPAC2F3.09	hem1	5-aminolevulinate synthase: heme biosynthesis	0.543667	0.240001
SPAC694.04c	0	conserved eukaryotic protein	0.543658	0.192462
SPAC20H4.08	0	phosphatase activator	0.543319	0.0758536
SPAC17A2.13c	rad25	14-3-3 protein Rad25	0.541948	0.0605986
SPAC3H1.05	0	CAAX prenyl protease	0.541385	0.202803
SPAC16A10.02	0	TREX complex	0.540565	0.207551
SPAC6F6.07c	rps13	40S ribosomal protein S13	0.540141	0.326093
SPCC191.08	0	conserved hypothetical: DUF1715 family protein	0.540051	0.0922048
SPBC800.12c	0	ubiquitin family protein	0.53804	0.0769826
SPAC2E1P5.03	0	DNAJ domain protein	0.537582	0.173562
SPBC16E9.15	0	small protein conserved in human and D. melanogaster	0.537413	0.0556042
SPBC1604.11	atp17	F-type ATPase subunit F	0.537158	0.115345
SPBC31F10.03	0	conserved hypotheticalz: ChaC-like protein	0.536631	0.238329
SPCC777.03c	0	nifs homolog	0.533681	0.104318
SPAC110.02	pds5	cohesin-associated protein	0.533255	0.216202
SPAC824.07	0	hydroxyacylglutathione hydrolase	0.531672	0.0944925
SPAC1751.04	0	sequence orphan	0.531666	0.0341253
SPAC22E12.05c	rer1	Rer1 family protein	0.531536	0.174162
SPAC13G7.06	met16	phosphoadenosine phosphosulfate reductase	0.529997	0.187951
SPAC139.06	hat1	histone acetyltransferase complex subunit	0.52965	0.14645
SPAC32A11.04c	tif212	translation initiation factor eIF2 beta subunit	0.528674	0.312134
SPCC1235.06	sif1	Sad1 interacting factor 1	0.528545	0.0693928
SPAC1834.03c	hhf1	histone H4	0.527165	0.226633
SPAC1B3.14	vma3	V-type ATPase	0.526286	0.0334029
SPCC1672.12c	0	conserved hypothetical: DUF410 family protein	0.525909	0.127942
SPBP4H10.12	0	conserved protein	0.525037	0.0387551
SPBC1685.02c	rps1202	40S ribosomal protein S12	0.524708	0.355825
SPAC1783.06c	atg12	autophagy associated protein Atg12	0.524468	0.207434
SPBC18H10.14	rps1601	40S ribosomal protein S16	0.524431	0.157537
SPBC13E7.07	0	sequence orphan	0.524242	0.167818
SPAC15E1.08	0	N-acetyltransferase	0.524224	0.204172
SPCC1442.05c	0	mitochondrial protein	0.523435	0.0163381
SPAC9E9.13	wos2	p23 homolog	0.522972	0.17669
SPBP18G5.03	toc1	Tor Complex Tor2 interacting protein 1	0.520931	0.169045
SPAC31A2.02	trm112	tRNA (guanine-N2-)-methyltransferase regulatory subunit Trm112 (predicted)	0.520908	0.120106
SPAC13A11.06	0	pyruvate decarboxylase	0.520014	0.0866306
SPBC16D10.09	pcn1	DNA replication: PCNA	0.519713	0.204072
SPAC19D5.09c	Tf2-8	transposable element	0.519385	0.0916308
SPAC22H10.02	0	conserved fungal protein	0.518839	0.44079
SPAC17G8.09	shg1	Csp15 family protein	0.517963	0.0627408
SPAC1071.12c	stp1	low molecular weight phosphotyrosine protein phosphatase	0.517515	0.186305
SPBC1773.10c	0	asparagine-tRNA ligase	0.517402	0.424778
SPAC589.03c	0	sequence orphan	0.516306	0.11674
SPBC1709.04c	cyp3	mRNA splicing/protein folding: cyclophilin family peptidyl-prolyl cis-trans isomerase Cyp3	0.514844	0.176062
SPBC14C8.10	mrpl24	mitochondrial ribosomal protein subunit L28	0.514176	0.157026
SPBC1105.06	pmc4	RNA polymerase II holoenzyme component	0.512624	0.33449
SPAC22E12.08	rrn10	RNA polymerase I upstream activation factor complex subunit Rrn10	0.512465	0.114422
SPCC1742.01	gsf2	glycoprotein	0.512113	0.234986
SPAC9.04	Tf2-1	retrotransposable element	0.511613	0.0659785
SPAC2E1P3.03c	Tf2-3	transposable element	0.511023	0.230761
SPAC15A10.08	ain1	alpha-actinin	0.510174	0.0955919
SPBC17G9.10	rpl1102	60S ribosomal protein L11	0.509324	0.360794
SPBC21.03c	0	conserved hypothetical: DUF55 family protein	0.508565	0.170758
SPBC30D10.05c	0	short chain dehydrogenase	0.508431	0.260851
SPAC4A8.12c	sds22	protein phosphatase regulatory subunit Sds22	0.507781	0.0264101
SPAC9.13c	cwf16	mRNA splicing: splicing factor (predicted)	0.507232	0.126034
SPAC17A5.08	0	COPII-coated vesicle component	0.506339	0.173169
SPAC6B12.15	cpc2	WD repeat protein Cpc2	0.506025	0.340114
SPBC2A9.07c	0	conserved hypothetical: zf-PARP type zinc finger protein	0.505572	0.122678
SPAC20H4.05c	0	conserved hypothetical: adducin	0.505278	0.101493
SPAPB2B4.05	vma5	V-type ATPase	0.50322	0.0777614
SPAC12G12.02	0	rRNA processing: pre-rRNA processing protein	0.502359	0.236068
SPCC18.16c	fmn1	vitamin metabolism: riboflavin kinase Fmn1	0.502188	0.0396638
SPAC3H1.13	ppk13	serine/threonine protein kinase Ppk13	0.501519	0.0800989
SPBC409.16c	0	recombination protein Saw1 (predicted)	0.500746	0.150425
SPBC32H8.05	0	conserved fungal protein	0.500474	0.173818
SPAC458.06	0	WD repeat protein	0.500453	0.106946
SPAC57A10.10c	sla1	La protein homolog	0.500305	0.35231
SPAC1805.07c	dad2	DASH complex subunit Dad2	0.499675	0.310422
SPAC27E2.08	Tf2-6	transposable element	0.498033	0.129774
SPAC27F1.06c	0	peptidyl-prolyl cis-trans isomerase	0.497641	0.126424
SPAC227.17c	0	conserved protein (fungal and plant)	0.49688	0.03953
SPAC13D1.01c	Tf2-7	retrotransposable element	0.496577	0.0996082
SPBC1105.07c	0	THO complex	0.49601	0.0794363
SPBC18E5.14c	0	sequence orphan; same as SPBC18E5.09c	0.49544	0.117419
SPAC7D4.15c	0	oligosaccharyltransferase subunit Ost4	0.49536	0.177673
SPAC18G6.03	ypt3	GTPase Ypt3	0.494203	0.0604318
SPAC823.09c	0	L-asparaginase	0.491966	0.277475
SPBC1271.03c	0	phosphoprotein phosphatase	0.491692	0.198351
SPAC25G10.05c	his1	ATP phosphoribosyltransferase	0.491072	0.184594
SPAC1002.04c	taf11	transcription factor TFIID complex subunit Taf11	0.490422	0.137001
SPBC3D6.09	dpb4	DNA replication initiation: DNA polymerase epsilon subunit Dpb4	0.490266	0.0761713
SPBC15D4.15	pho2	4-nitrophenylphosphatase	0.489251	0.170906
SPBC2F12.14c	gua1	IMP dehydrogenase Gua1	0.489158	0.129638
SPBC18E5.01	0	conserved hypothetical: cycloisomerase 2 family	0.489023	0.111086
SPAC823.15	ppa1	minor serine/threonine protein phosphatase Ppa1	0.488536	0.330089
SPAC22F3.06c	0	Lon protease homolog	0.48814	0.105616
SPCC24B10.03	0	sequence orphan	0.488013	0.0420921
SPAC11D3.13	0	conserved hypothetical (ThiJ domain protein)	0.487694	0.122912
SPCC16A11.13	luc7	mRNA splicing: U1 snRNP-associated protein	0.487286	0.117202
SPAC16E8.15	tif45	translation initiation factor	0.485242	0.263719
SPCC330.06c	0	oxidative stress response/redox homeostasis: thioredoxin peroxidase	0.484121	0.0284507
SPBP35G2.12	0	nucleoside diphosphate-sugar hydrolase	0.484005	0.188664
SPAC6B12.18	0	dubious ORF	0.482885	0.211785
SPAC31G5.16c	dpm1	phospholipid biosynthesis: dolichol-phosphate mannosyltransferase catalytic subunit Dpm1	0.481014	0.340037
SPCC1795.05c	0	uridylate kinase	0.480885	0.0421294
SPAC20H4.03c	tfs1	transcription elongation factor TFIIS	0.480842	0.130414
SPAC3H5.12c	rpl501	60S ribosomal protein L5	0.480728	0.464567
SPAC6F6.09	0	NuA4 histone acetyltransferase complex subunit (predicted)	0.480177	0.235127
SPAP8A3.02c	ofd2	2 OG-Fe(II) oxygenase superfamily protein Ofd2	0.478885	0.0559106
SPCC622.02	0	dubious ORF	0.478414	0.0811249
SPBC409.20c	psh3	ER chaperone SHR3 homologue Psh3	0.478237	0.331466
SPAC9E9.11	plr1	vitamin metabolism: pyridoxal reductase	0.476227	0.123729
SPBC1604.09c	0	rRNA processing: exoribonuclease Rex4 (predicted)	0.4761	0.0556447
SPCC1753.05	rsm1	RNA export factor Rsm1	0.475222	0.120468
SPAC4A8.09c	cwf21	mRNA splicing: complexed with Cdc5p	0.474677	0.18701
SPBC365.03c	rpl2101	60S ribosomal protein L21	0.474387	0.358568
SPAC144.11	rps1102	40S ribosomal protein S11	0.474043	0.18536
SPAC1296.02	cox4	aerobic respiration: cytochrome c oxidase subunit IV	0.473892	0.125218
SPAC26F1.03	pda1	glycolysis: pyruvate dehydrogenase e1 component	0.473848	0.0602671
SPAC3H5.07	rpl702	60S ribosomal protein L7	0.472631	0.0441846
SPBC25B2.09c	0	arginine-tRNA ligase	0.471724	0.190907
SPBP8B7.05c	0	carbonic anhydrase	0.47161	0.259397
SPAC3F10.08c	0	rRNA processing:: rRNA processing protein Faf1 (predicted)	0.470959	0.155467
SPAC3H1.10	0	phytochelatin synthetase	0.470129	0.238625
SPAC6G9.03c	0	histone chaperone	0.470047	0.172298
SPBC4B4.06	vps25	late endosome to vacuole transport: ESCRT II complex subunit Vps25	0.469621	0.0619547
SPBC23G7.14	0	sequence orphan	0.468626	0.233321
SPAC3A12.02	0	inorganic pyrophosphatase	0.468276	0.14947
SPAC19A8.04	erg5	ergosterol biosynthesis: C-22 sterol desaturase	0.467664	0.140532
SPAC23H3.08c	bub3	mitotic spindle checkpoint: mitotic spindle checkpoint protein Bub3	0.467116	0.12787
SPBC1709.03	0	conserved fungal protein	0.466499	0.1195
SPAC688.03c	0	conserved hypothetical: human AMMECR1 homolog	0.464872	0.0876426
SPAC32A11.01	mug8	conserved fungal protein	0.46475	0.174945
SPAC9E9.09c	0	alcohol dehydrogenase	0.463566	0.334317
SPBC800.07c	tsf1	mitochondrial translation elongation factor EF-Ts Tsf1	0.463539	0.192313
SPAC23H4.04	0	tRNA(5-methylaminomethyl-2-thiouridylate)-methyltransferase	0.463465	0.173076
SPBC1289.17	Tf2-11	retrotransposable element	0.461394	0.124041
SPAC13C5.06c	mug121	sequence orphan (ER/Golgi protein)	0.46138	0.247951
SPCC320.12	0	mitochondrial inner membrane peptidase Atp23 (predicted)	0.459644	0.0683264
SPCC338.06c	0	heat shock protein	0.459474	0.301675
SPBC4C3.10c	0	20S proteasome component	0.459325	0.293308
SPAC343.14c	0	translation initiation factor eIF2B	0.45926	0.175465
SPAC17H9.11	0	cofilin/tropomyosin family	0.458302	0.15395
SPAC14C4.16	dad3	DASH complex subunit Dad3	0.458132	0.303538
SPAC18B11.07c	rhp6	ubiquitin conjugating enzyme	0.457738	0.00785803
SPCC736.08	cbf11	regulator of cell separation/cytokinesis: CBF1/Su(H)/LAG-1 family transcription factor Cbf11	0.457021	0.041685
SPBC582.09	pex11	peroxisomal biogenesis factor 11	0.456755	0.286663
SPBC409.04c	mis12	kinetochore protein Mis12	0.455839	0.0446635
SPAC24H6.02c	0	TIM23 translocase complex subunit Tim15	0.455745	0.195515
SPAC16C9.02c	0	S-methyl-5-thioadenosine phosphorylase	0.455512	0.0522096
SPBC26H8.06	grx4	oxidative stress response/redox homeostasis: glutaredoxin	0.454726	0.377266
SPAPB1E7.10	rpc17	DNA-directed RNA polymerase III complex subunit Rpc17	0.4546	0.0259607
SPBC2A9.09	0	conserved hypothetical: phosducin-like protein	0.454067	0.0881642
SPAC664.07c	rad9	DNA replication initiation: checkpoint clamp complex protein Rad9	0.453254	0.194113
SPAC27D7.06	0	electron transfer flavoprotein alpha subunit	0.452831	0.324127
SPAC11E3.12	0	conserved eukaryotic protein	0.452679	0.128779
SPBC19C7.10	0	transcription factor	0.451157	0.131607
SPAC167.08	Tf2-2	transposable element	0.450519	0.120272
SPBC1289.16c	0	copper amine oxidase	0.449441	0.378004
SPBC16H5.05c	cyp7	mRNA splicing/protein folding: cyclophilin family peptidyl-prolyl cis-trans isomerase Cyp7	0.449057	0.466615
SPAC57A10.14	sgf11	SAGA complex subunit	0.448354	0.0608867
SPAC24H6.10c	0	phospho-2-dehydro-3-deoxyheptonate aldolase	0.448212	0.169266
SPBC14F5.04c	pgk1	glycolysis: phosphoglycerate kinase	0.44798	0.00312465
SPBC713.09	0	sequence orphan	0.447758	0.105163
SPBC19C2.02	pmt1	DNA methyltransferase homolog	0.447684	0.17232
SPBC776.11	rpl2801	60S ribosomal protein Ll28B 27a	0.447651	0.14906
SPAC664.13	0	sequence orphan	0.447551	0.0953449
SPBC1198.04c	zas1	zinc finger protein	0.44742	0.167916
SPAC17G6.15c	0	MTC tricarboxylate transporter	0.447135	0.049807
SPBC25H2.10c	0	tRNA acetyltransferase	0.446902	0.0526416
SPCC63.14	0	conserved fungal protein	0.446687	0.0744826
SPCC1919.15	0	zinc finger protein	0.446022	0.00696944
SPAC17H9.03c	rdl1	sequence orphan	0.445911	0.180224
SPBC30D10.08	mgm101	mitochondrial nucleoid protein	0.445757	0.0378279
SPAC26A3.07c	rpl1101	60S ribosomal protein L11	0.445547	0.427392
SPAC3H1.07	0	arginase	0.445215	0.300655
SPCC1183.02	0	glutathione S-transferase	0.44488	0.151073
SPAC27F1.04c	nuf2	mitotic spindle checkpoint: spindle pole body protein Nuf2	0.44263	0.131308
SPAC18G6.06	0	rRNA processing: U3 snoRNP-associated protein Utp11 (predicted)	0.442121	0.136071
SPAC1296.06	0	NADPH cytochrome reductase	0.441732	0.0663418
SPCC18B5.04	rsm18	mitochondrial ribosomal protein subunit S18	0.441102	0.302978
SPBC26H8.05c	0	serine/threonine protein phosphatase	0.440554	0.148435
SPAC17D4.01	pex7	peroxin-7	0.438104	0.0607273
SPCC622.06c	0	dubious ORF	0.437816	0.512838
SPCC1739.09c	cox13	aerobic respiration: cytochrome c oxidase subunit VIa	0.437714	0.150555
SPBC28F2.10c	kap1	kinesin-associated protein	0.437359	0.260584
SPBC25H2.13c	cdc20	DNA replication initiation: DNA polymerase epsilon catalytic subunit a Pol2	0.437215	0.0113112
SPAC323.01c	0	oxidative stress response: mitochondrial NADH kinase (predicted)	0.437102	0.0982682
SPAC13G6.11c	erg12	ergosterol biosynthesis: mevalonate kinase Erg12	0.435236	0.222624
SPBC30D10.04	swi3	DNA replication: replication fork protection complex subunit Swi3	0.43487	0.17666
SPAC31A2.08	mrp20	mitochondrial ribosomal protein subunit L23	0.433453	0.0382274
SPBC1105.03c	mrpl16	mitochondrial ribosomal protein subunit L16	0.433299	0.214974
SPCC1450.04	tef5	translation elongation factor EF-1 beta subunit	0.432509	0.0999331
SPAC1851.03	ckb1	CK2 family	0.430946	0.0400265
SPAC664.01c	swi6	centromere silencing: chromodomain protein Swi6	0.43056	0.0465458
SPBC18E5.12c	mas2	mitochondrial processing peptidase complex alpha subunit	0.429788	0.155325
SPCC162.03	0	short chain dehydrogenase	0.429725	0.258451
SPCP31B10.03c	med31, sep10	mediator complex subunit	0.429434	0.106133
SPBC32F12.12c	0	Golgi membrane protein involved in vesicle-medated transport (predicted)	0.42921	0.194616
SPBC776.03	0	amino acid/isoleucine synthesis: homoserine dehydrogenase	0.429151	0.422075
SPAC25A8.03c	0	conserved hypothetical: DUF185 protein	0.428942	0.191704
SPCC576.12c	0	conserved hypothetical: DUF2008 family protein	0.428867	0.0247686
SPBC1709.17	0	folylpolyglutamate synthase	0.428675	0.147489
SPBC211.08c	0	rRNA processing: exosomal 3'-5' exoribonuclease, PH-like: exosome	0.426169	0.137645
SPCC4B3.06c	0	NADPH-dependent FMN reductase	0.424351	0.174546
SPCC18.11c	sdc1	Dpy-30 domain protein	0.424179	0.0266467
SPAC16E8.14c	0	methyltransferase	0.423737	0.0986775
SPCC338.17c	rad21	kleisin	0.423329	0.156378
SPAC31G5.05c	0	vitamin metabolism: ribulose phosphate 3-epimerase	0.422785	0.0729807
SPBC16E9.12c	pab2	poly(A) binding protein	0.422579	0.0703962
SPAC31A2.10	0	RanGTP-binding protein	0.422147	0.0356974
SPCC1919.13c	0	conserved eukaryotic protein	0.421688	0.0661545
SPAC1687.12c	coq4	ubiquinone biosynthesis protein Coq4	0.420598	0.251157
SPAPB1A10.10c	ypt71	GTPase	0.420522	0.145495
SPAC12B10.05	0	metallopeptidase	0.419771	0.117877
SPBC839.09c	mrp21	mitochondrial ribosomal protein subunit Mrp21	0.4197	0.164636
SPBC21B10.10	rps402	40S ribosomal protein S4	0.419389	0.138765
SPAC4C5.04	rad31	SUMO E1-like activator enzyme Rad31	0.419233	0.0792449
SPCC126.11c	0	RNA-binding protein	0.418269	0.0998842
SPBC1289.11	spf38	mRNA splicing: WD repeat protein	0.418134	0.141409
SPBC25B2.05	mis3	rRNA processing: KH domain	0.417922	0.135446
SPBP4G3.02	pho1	acid phosphatase	0.417316	0.207682
SPAC4G9.17c	mrps5	mitochondrial ribosomal protein subunit S5	0.416793	0.34474
SPAC977.12	0	L-asparaginase	0.416054	0.0076704
SPBP8B7.28c	0	sequence orphan	0.415438	0.0425915
SPBC25D12.04	suc22	ribonucleotide reductase small subunit Suc22	0.415187	0.254012
SPAC18B11.06	0	rRNA processing: U3 snoRNP-associated protein Lcp5 (predicted)	0.415071	0.14816
SPBC1539.01c	0	mitochondrial ribosomal protein	0.414546	0.175073
SPAP14E8.05c	0	conserved hypothetical: UPF0136 family protein	0.414274	0.490931
SPBC18E5.09c	0	sequence orphan; same as SPBC18E5.14c	0.413104	0.124731
SPCC569.01c	0	conserved hypothetical: cell surface glycoprotein (predicted), DUF1773 family protein 5	0.41298	0.0517351
SPBC16G5.04	mrpl23	mitochondrial ribosomal protein subunit L13	0.41285	0.259808
SPCC330.03c	0	cytochrome b5 family	0.41228	0.429572
SPAC644.18c	bet3	TRAPP	0.411787	0.073544
SPBC115.03	0	oxidoreductase	0.411731	0.135517
SPBC3B8.09	0	rRNA processing: U3 snoRNP-associated protein Utp3 (predicted)	0.411583	0.267931
SPCC1393.09c	0	RWD domain	0.41126	0.0584569
SPBC17A3.02	0	conserved fungal protein	0.411248	0.33495
SPAPB2B4.02	grx5	oxidative stress response/redox homeostasis: monothiol glutaredoxin	0.411001	0.123022
SPAC19B12.06c	0	rhomboid family protease	0.410994	0.0194959
SPAC8C9.19	0	conserved fungal protein (hypothetical)	0.410258	0.211248
SPBC405.05	0	sequence orphan	0.410174	0.212485
SPAC19B12.12c	yip11	mRNA splicing: SMN family	0.410161	0.0919203
SPAC1B3.02c	0	transcription elongation factor, Elf1 family	0.409434	0.0495785
SPAC1751.03	0	translation initiation factor eIF3m	0.409086	0.0607917
SPBC2F12.04	rpl1701	60S ribosomal protein L17	0.408955	0.114002
SPAC13F5.02c	ptr6	transcription factor TFIID complex subunit Taf7	0.408584	0.0601792
SPAPB17E12.11	0	N-oligosaccharyltransferase	0.40832	0.135955
SPAC23D3.07	0	20S proteasome component	0.407099	0.378953
SPCC622.07	0	dubious ORF	0.406941	0.143843
SPBPB10D8.06c	0	malate permease	0.40671	0.283003
SPCC320.10	srp72	signal recognition particle subunit Srp72	0.406139	0.0281328
SPAC1805.12c	uep1	ribosomal-ubiquitin fusion protein	0.405159	0.0487264
SPAC15A10.10	mde6	Muskelin homolog: mei4-regulated gene	0.40458	0.0501577
SPCC1682.01	qcr9	aerobic respiration: ubiquinol-cytochrome-c reductase complex subunit 10	0.404497	0.254515
SPBC16D10.06	0	ZIP zinc transporter domain	0.404142	0.175959
SPAC16E8.10c	0	mitochondrial ribosomal protein subunit S7	0.403924	0.135358
SPBC19G7.04	0	transcriptional regulator	0.403276	0.0546166
SPBC800.06	brx1	rRNA processing: ribosome biogenesis protein Brx1	0.402866	0.033077
SPBC1271.07c	0	N-acetyltransferase	0.402536	0.318445
SPCC162.06c	0	late endosome to vacuole transport: SNF7 family class E vps	0.402237	0.166563
SPAC1B3.07c	vps28	late endosome to vacuole transport: ESCRT I complex subunit	0.402234	0.0948303
SPBC1711.06	rpl401	60S ribosomal protein L2	0.402193	0.194564
SPBC28F2.04c	cwf7	mRNA splicing: 40S snRNP-containing complex	0.402174	0.270948
SPBC27B12.14	0	mitochondrial membrane protein complex assembly protein	0.401768	0.0326031
SPAC6G9.07c	arc4	actin cortical patch: ARP2/3 actin-organizing complex subunit Arc4	0.40164	0.220408
SPAC8C9.07	0	rRNA processing protein Fyv7 (predicted)	0.400412	0.152305
SPBC2F12.12c	0	conserved hypothetical: human c19orf29 ortholog	0.399725	0.0589163
SPCC645.04	nse3	DNA replication: Smc5-6 complex non-SMC subunit Nse3	0.399717	0.0993167
SPBC336.08	spc24	spindle pole body protein Spc24	0.398189	0.0950442
SPCC1840.01c	mog1	Ran GTPase interacting protein Mog1	0.397695	0.205347
SPBC1709.18	tif452	translation initiation factor	0.397365	0.0419071
SPBC16A3.14	0	mitochondrial ribosomal subunit	0.396532	0.0343248
SPAC4F8.02c	mrpl40	mitochondrial ribosomal protein subunit L40	0.395667	0.0437731
SPBC947.09	0	oxidative stress response: conserved hypothetical: ThiJ domain protein	0.395062	0.0919173
SPBC25H2.05	ucp15	nascent polypeptide-associated complex	0.39453	0.283191
SPAC823.14	0	phosphoric monoester hydrolase	0.393808	0.0719144
SPCC2H8.05c	0	sequence orphan	0.393776	0.137971
SPBC577.04	0	human THOC5 homolog (predicted) mRNA export; mRNA elongation	0.393537	0.307416
SPAC27F1.03c	uch1	ubiquitin C-terminal hydrolase activity	0.393395	0.168789
SPAC4G9.16c	rpl901	60S ribosomal protein L9	0.391811	0.31056
SPBC725.13c	psf2	DNA replication initiation: GINS complex subunit Psf2	0.391381	0.152965
SPBP8B7.22	erd2	HDEL receptor	0.39138	0.263376
SPBPB10D8.05c	0	malate permease	0.39096	0.105799
SPCC970.10c	0	E3 ubiquitin ligase	0.39057	0.145874
SPAC144.16	0	conserved hypothetical: DUF59 family protein	0.390137	0.28842
SPBC9B6.07	0	rRNA processing: nucleolar protein Nop52 family	0.390038	0.215781
SPAC4A8.13c	pts1	20S proteasome component	0.389853	0.151892
SPBC23G7.07c	0	DNA replication regulator (predicted)	0.388997	0.174256
SPAC13G6.02c	rps101	40S ribosomal protein S3a	0.388949	0.292009
SPBC216.03	0	conserved fungal protein	0.388579	0.177052
SPAPB1A10.11c	0	glutamyl-tRNA synthetase	0.388231	0.14513
SPAC4G9.02	0	DNA replication: ribonuclease H	0.387901	0.0152277
SPAC1F12.07	0	phosphoserine aminotransferase	0.387537	0.244669
SPAC3C7.10	0	src	0.387465	0.0949233
SPCC5E4.07	rpl2802	60S ribosomal protein L27a.2/L28A	0.387372	0.379251
SPAC4G8.10	gos1	SNARE	0.387204	0.0950778
SPAC23H4.09	cdb4	curved DNA-binding protein Cdb4	0.387178	0.187785
SPAC823.05c	tlg2	SNARE	0.386972	0.133993
SPAC821.12	orb6	cell polarity/regulator of cell separation/cytokinesis: serine/threonine protein kinase Orb6	0.386574	0.20069
SPCC613.07	0	zf-HIT	0.385866	0.130621
SPAC23A1.03	apt1	adenine phosphoribosyltransferase	0.385829	0.329023
SPBC776.17	0	rRNA processing: rRNA processing protein Rrp7 (predicted)	0.385258	0.0632246
SPAC29E6.08	tbp1	TATA-binding protein	0.385213	0.125119
SPAC19B12.10	sst2	late endosome to vacuole transport: human AMSH protein homolog	0.384086	0.340176
SPCC285.08	ret2	coatomer delta subunit	0.382881	0.139397
SPBC83.17	0	multiprotein bridging factor	0.382817	0.0313279
SPBC3B9.10	vti1	late endosome to vacuole transport: SNARE	0.382527	0.119227
SPAC30.03c	tsn1	translin	0.380879	0.242949
SPBC1683.12	0	nicotinic acid plasma membrane transporter	0.380728	0.0158694
SPBC215.07c	pdp2	PWWP domain protein: histone H4-K20 methylation	0.380358	0.196456
SPCC285.03	0	rRNA processing: ATP-dependent RNA helicase Dbp6 (predicted)	0.380027	0.12358
SPBC21H7.07c	his5	imidazoleglycerol phosphate dehydratase	0.379574	0.023968
SPAC6F6.05	0	oligosaccharyltransferase epsilon subunit	0.379457	0.214616
SPBC1198.05	0	guanylate kinase	0.379201	0.214914
SPBC685.05	gpi15	phospholipid biosynthesis: pig-H	0.379124	0.115264
SPAC27E2.03c	0	GTP binding	0.378936	0.251164
SPCC1235.11	0	mitochondrial protein, human BRP44L ortholog	0.378929	0.218176
SPBC25H2.12c	cct7	chaperonin-containing T-complex eta subunit Cct7	0.378241	0.00528487
SPAC13F5.07c	0	oxidative stress response: sequence orphan	0.377236	0.0296494
SPAC30D11.09	cwf19	mRNA splicing: complexed with Cdc5 protein	0.375839	0.0749811
SPCC1020.12c	0	xap-5-like protein	0.37541	0.0858024
SPBC1604.13c	mrpl32	mitochondrial ribosomal protein subunit L32	0.375355	0.125649
SPAC11E3.07	vma4	V-type ATPase	0.374839	0.0823702
SPBC337.14	rpb4	DNA-directed RNA polymerase II complex subunit Rpb4	0.374694	0.141446
SPAC959.07	rps403	40S ribosomal protein S4	0.374653	0.273054
SPBC21H7.02	taf10	transcription factor TFIID complex subunit Taf10	0.374509	0.119087
SPCC1753.01c	ssb2	DNA replication: single-stranded DNA binding protein Ssb2	0.373828	0.481885
SPBC13G1.06c	isd11	iron sulfur cluster assembly protein Isd11	0.373819	0.0902906
SPBC18E5.03c	sim4	centromere silencing: kinetochore protein Sim4	0.373676	0.118103
SPAC20H4.02	0	GTP binding	0.373379	0.0131031
SPBC530.07c	0	vitamin metabolism: TENA/THI domain	0.3733	0.137241
SPAC1687.18c	ssl3	complex I intermediate-associated protein 30 homolog	0.373082	0.189122
SPBC582.07c	rpn7	19S proteasome regulatory subunit	0.372833	0.383269
SPAC10F6.03c	0	CTP synthase	0.372618	0.314004
SPAC26A3.11	0	amidohydrolase	0.371101	0.0945166
SPAC4D7.05	sum1	DNA replication initiation: translation initiation factor eIF3i	0.370313	0.0876202
SPAC1039.11c	0	alpha-glucosidase	0.370263	0.0838428
SPAC27D7.04	omt2	ascospore formation: 4-alpha-hydroxytetrahydrobiopterin dehydratase	0.370124	0.322288
SPAC652.01	0	conserved hypothetical: BC10 family protein	0.369889	0.2849
SPCC965.12	0	dipeptidase	0.369363	0.112403
SPAC823.16c	mug179	phosphatidylinositol 3,5-bisphosphate binding protein	0.368786	0.120754
SPAC2F3.11	0	exopolyphosphatase	0.368777	0.00822743
SPAP27G11.09c	0	vitamin metabolism: GTP cyclohydrolase	0.368358	0.350225
SPBC21.07c	ppk24	serine/threonine protein kinase Ppk24	0.366919	0.228485
SPBC215.06c	0	zinc finger protein	0.36673	0.080218
SPCC1795.01c	mad3	mitotic spindle checkpoint: mitotic spindle checkpoint protein Mad3	0.366546	0.0460814
SPAC3A12.12	atp11	F1-ATPase chaperone	0.36613	0.080818
SPBC2F12.11c	rep2	G1/S transition: transcriptional activator Rep2	0.366103	0.107803
SPCC1682.16	rpt4	19S proteasome regulatory subunit	0.365934	0.0393305
SPAC13C5.07	rad32	telomere maintenance: Rad32 nuclease	0.365756	0.192666
SPCC1020.04c	rpb6	DNA-directed RNA polymerase I, II and III subunit Rpb6	0.364855	0.423731
SPAC22H12.04c	rps102	40S ribosomal protein S3a	0.364585	0.33014
SPBC16G5.13	0	sequence orphan	0.364151	0.27538
SPAC3A12.14	cam1	calmodulin	0.364055	0.148052
SPAP27G11.07c	0	telomere maintenance: serine/threonine protein kinase	0.362964	0.0695591
SPAC1B3.03c	wis2	cyclophilin	0.361878	0.159222
SPAC11G7.03	idh1	aerobic respiration: isocitrate dehydrogenase	0.361826	0.111991
SPBC36.12c	git7	SGT1-like protein Git7	0.361077	0.112466
SPBC31E1.05	gle1	RNA export factor	0.360957	0.109277
SPAC16.04	0	dihydrouridine synthase	0.360652	0.120242
SPBC27.06c	mgr2	mitochondrial membrane protein Mgr1	0.359686	0.334034
SPBC1A4.02c	leu1	amino acid/leucine biosynthesis: 3-isopropylmalate dehydrogenase Leu1	0.358948	0.229221
SPAC3C7.07c	0	arginine-tRNA protein transferase	0.358835	0.0603695
SPAC6G9.05	0	peroxisomal coenzyme A diphosphatase	0.358311	0.0206854
SPAC19D5.05c	0	rRNA processing: U3 snoRNP-associated protein Imp3 (predicted)	0.358251	0.045379
SPBC26H8.09c	0	chromatin remodeling complex subunit	0.357926	0.295449
SPCC4B3.18	0	phosphopantothenate-cysteine ligase	0.357838	0.0515466
SPAC17G6.14c	uap56	mRNA splicing: ATP-dependent RNA helicase Uap56	0.357315	0.00464712
SPAC637.10c	rpn10	19S proteasome regulatory subunit Rpn10	0.356779	0.246418
SPCC1020.03	0	iron ion homeostasis: CDF metal cation transporter	0.355537	0.101512
SPCC1020.11c	0	conserved hypothetical: DUF786 family protein	0.354878	0.181788
SPAC4F10.02	0	aspartyl aminopeptidase	0.354665	0.00773887
SPBC3D6.05	ptp4	phosphatidate cytidylyltransferase Ptp4	0.354559	0.190844
SPCC1620.10	cwf26	mRNA splicing: complexed with Cdc5 protein	0.354206	0.383956
SPAC11E3.10	0	VanZ-like family protein	0.353604	0.0843595
SPAC13D6.01	pof14	ergosterol biosynthesis: F-box protein: may be involved in oxidative stress and ergosterol regulation	0.353236	0.128511
SPAC823.10c	0	mitochondrial carrier	0.352903	0.0310884
SPBC8D2.11	0	sequence orphan	0.351832	0.076394
SPAC7D4.13c	0	sequence orphan	0.35148	0.167789
SPBC725.15	ura5	orotate phosphoribosyltransferase Ura5	0.350665	0.100882
SPBC2D10.08c	0	mitochondrial ribosomal protein subunit Yml6	0.350388	0.0494563
SPCC162.05	coq3	hexaprenyldihydroxybenzoate methyltransferase	0.349931	0.224418
SPAC683.02c	0	zinc finger protein	0.349741	0.0806201
SPBC28F2.03	ppi1	cyclophilin	0.349463	0.242512
SPBC1683.08	ght4	hexose transporter	0.349392	0.227323
SPBC30D10.09c	0	TB2/DP1 domain	0.348459	0.260447
SPCC364.01	cif1	calnexin independence factor Cif1: ER-nuclear signalling pathway	0.348338	0.153603
SPBC1271.14	0	amino acid/arginine biosynthesis: glutamate N-acetyltransferase	0.348117	0.0377602
SPAC23C4.08	rho3	regulator of cell separation/cytokinesis: Rho family GTPase Rho3	0.347609	0.247436
SPCPB16A4.04c	trm8	tRNA (guanine-N7-)-methyltransferase catalytic subunit Trm8 (predicted)	0.347296	0.054264
SPAC12B10.04	0	tubulin-tyrosine ligase	0.346603	0.0229378
SPBC21D10.10	0	bromodomain protein	0.345867	0.167053
SPAC869.02c	0	nitric oxide dioxygenase	0.345432	0.281323
SPAC6B12.14c	0	conserved fungal protein: may be dubious ORF	0.345074	0.0707768
SPAC1952.03	0	OTU-like cysteine protease	0.344915	0.0818801
SPAC3G9.09c	tif211	translation initiation factor eIF2 alpha subunit	0.3447	0.111468
SPCC965.09	0	hydrolase	0.344326	0.0599675
SPBC365.06	pmt3	centromere silencing: SUMO	0.344108	0.023724
SPBC1778.09	0	GTPase activating protein	0.343685	0.108886
SPAC2F7.17	0	peptide chain release factor	0.341967	0.125835
SPAC9.07c	0	GTPase	0.34149	0.0819358
SPAPB1A10.16	0	conserved fungal protein	0.341362	0.118934
SPAC688.14	0	lysine methyltransferase	0.341102	0.193925
SPBP8B7.24c	atg8	autophagy associated protein Atg8	0.340839	0.14799
SPCC550.05	nse1	DNA replication: Smc5-6 complex non-SMC subunit 1	0.340757	0.0307
SPAC23G3.02c	sib1	iron ion homeostasis: ferrichrome synthetase Sib1	0.339631	0.0221399
SPAC25B8.17	0	peptidase family A22	0.339509	0.17589
SPAC11E3.06	map1	MADS-box transcription factor Map1	0.338455	0.199488
SPAC1F7.13c	rpl801	60S ribosomal protein L2A	0.338237	0.598943
SPAC222.05c	mss1	COX RNA-associated protein	0.338113	0.122539
SPBPJ4664.05	0	conserved yeast protein	0.337982	0.0158532
SPAC4G9.06c	chz1	histone chaperone Chz1 (predicted)	0.337817	0.215753
SPCC777.14	prp4	mRNA splicing: serine/threonine protein kinase Prp4	0.337744	0.0738023
SPBC1703.10	ypt1	GTPase	0.337307	0.0737533
SPAC1556.08c	0	protein kinase activator	0.336711	0.260029
SPAC27D7.08c	0	conserved hypothetical: DUF890 family protein	0.336488	0.0214391
SPBC14C8.06	arc1	actin cortical patch: ARP2/3 actin-organizing complex subunit Sop2	0.336359	0.138194
SPAC4A8.07c	0	sphingoid long chain base	0.336087	0.185045
SPBPB8B6.05c	0	L-asparaginase	0.335705	0.150391
SPBC21C3.06	0	sequence orphan	0.335173	0.128026
SPBC27.03	meu25	meiotic expression upregulated	0.335037	0.339518
SPBC11C11.10	0	pseudouridine synthase	0.334329	0.169588
SPAC1D4.06c	csk1	cyclin-dependent kinase activating kinase Csk1	0.334217	0.158028
SPAC630.06c	0	conserved fungal protein	0.33405	0.166256
SPBC1773.14	arg7	amino acid/arginine biosynthesis: argininosuccinate lyase	0.333786	0.261135
SPBC12C2.05c	0	actin cortical patch: diacylglycerol binding protein Bzz1	0.33335	0.0596922
SPAC24C9.06c	0	aerobic respiration: aconitate hydratase	0.333016	0.227356
SPBC16H5.10c	prp43	mRNA splicing: pre-mRNA processing RNA helicase Prp43	0.332857	0.124677
SPACUNK4.14	mdb1	conserved hypothetical: BRCT domain protein	0.332687	0.0686294
SPAC19B12.07c	0	human ZNF277P homolog	0.332682	0.0953607
SPAC30C2.05	erv14	cornichon family	0.331921	0.17898
SPBC887.06c	snx3	sorting nexin Snx3: late endosome to Golgi transport	0.331684	0.00677789
SPAC31A2.03	mrpl11	mitochondrial ribosomal protein subunit L11	0.331542	0.0486533
SPBC13G1.04c	0	alkB homolog	0.331496	0.212412
SPBC21C3.12c	0	conserved hypothetical: DUF953 family protein	0.331271	0.162355
SPAC23D3.02	rfc2	DNA replication initiation: DNA replication factor C complex subunit Rfc2	0.329987	0.366724
SPAC24C9.09	0	threonine-tRNA ligase	0.329696	0.0891928
SPCC1682.07	ssl1	transcription factor TFIIH complex subunit Ssl1	0.329663	0.219056
SPBC3B9.08c	0	mago-nashi homolog	0.329408	0.0587518
SPBC14F5.12c	cbh2	centromere silencing: centromere binding protein Cbh2	0.329346	0.122789
SPAC4F8.03	0	UPF0023 family	0.329269	0.103144
SPAC15A10.07	0	sequence orphan	0.327858	0.1293
SPAC3G9.06	frs2	phenylalanine-tRNA ligase alpha subunit	0.327391	0.180226
SPCC794.01c	0	pentose phoshate shunt: glucose-6-phosphate 1-dehydrogenase	0.326849	0.160016
SPAC9G1.11c	spn4	septin	0.326024	0.00726775
SPBC19F5.04	0	aspartate kinase	0.325887	0.235101
SPBP35G2.04c	0	sequence orphan (nucleolus)	0.325273	0.123685
SPAC1071.06	arp9	actin-like protein	0.325173	0.178391
SPBPB10D8.04c	0	malate permease	0.324916	0.0443197
SPBC16G5.03	0	zinc finger protein	0.324649	0.00877706
SPAC31A2.04c	0	20S proteasome component	0.324335	0.165913
SPBC1289.06c	0	sequence orphan (mitochondrion)	0.324118	0.0293482
SPAPB24D3.06c	0	conserved hypothetical: DUF1749 family protein	0.323986	0.0307055
SPCC24B10.11c	0	THO complex subunit 7 (predicted): mRNA export; mRNA elongation	0.323902	0.0701382
SPAC1250.04c	atl1	DNA methyltransferase	0.323728	0.281792
SPAC17D4.02	cdc45	DNA replication initiation: pre-initiation complex subunit Cdc45	0.323165	0.123515
SPCC1827.08c	pof7	F-box protein	0.323064	0.0975807
SPAC16C9.05	0	zinc finger protein	0.322769	0.262033
SPBC887.13c	0	fatty acid biosynthesis: 3-oxoacyl-[acyl-carrier protein]-synthase	0.32272	0.169327
SPAC227.18	lys3	saccharopine dehydrogenase [NAD+, L-lysine forming]	0.322359	0.0994576
SPCC1393.04	fta4	Sim4 and Mal2 associated	0.321926	0.0891426
SPBC19F8.01c	spn7	septin	0.32162	0.25149
SPAC17G8.05	0	TATA-box related factor	0.321217	0.0606894
SPAC25G10.04c	rec10	meiotic recombination protein Rec10	0.320606	0.0457024
SPAC22G7.10	0	mRNA polyadenylation: mRNA cleavage and polyadenylation specificity factor complex subunit, Fip1 homolog (predicted)	0.320605	0.113687
SPBC32H8.09	0	WD repeat protein	0.32027	0.158214
SPCC1259.09c	0	pyruvate dehydrogenase protein x component	0.318267	0.30111
SPCP20C8.01c	0	S. pombe specific families: cell surface glycoprotein (predicted), DUF2429 family	0.318241	0.00586921
SPAC1527.02	sft2	Golgi transport protein Sft2	0.318157	0.153324
SPBC11G11.05	rpa34	DNA-directed RNA polymerase I complex subunit Rpa34	0.318086	0.200982
SPBC725.09c	hob3	actin cortical patch: amphiphysin	0.317894	0.0485531
SPAC1039.06	0	alanine racemase	0.317708	0.306996
SPAC343.03	apc11	anaphase-promoting complex subunit Apc11	0.317078	0.207146
SPAC22F8.06	pam1	20S proteasome component	0.31698	0.188032
SPAC8F11.04	0	rRNA processing: U3 snoRNP-associated protein Cic1/Utp30 family (predicted)	0.316691	0.457789
SPCC1322.16	0	prohibitin	0.316569	0.269347
SPAC513.03	mfm2	conjugation: M-factor precursor	0.315365	0.173733
SPAPB18E9.01	trm5	tRNA (guanine) methyltransferase Trm5 (predicted)	0.314776	0.11512
SPCC14G10.01	0	dephospho-CoA kinase	0.314573	0.175656
SPBC30D10.06	lsm4	rRNA processing/mRNA splicing: U6 snRNP-associated protein	0.314544	0.101767
SPBC660.09	mug168	sequence orphan	0.314086	0.0943453
SPBC713.10	tim16	TIM23 translocase complex subunit Tim16	0.313791	0.105589
SPBC1709.12	rid1	GTPase binding protein Rid1	0.31374	0.182264
SPCC338.11c	rrg1	methyltransferase	0.313265	0.10859
SPBC17G9.02c	0	RNA polymerase II accessory factor, Cdc73 family	0.313117	0.113953
SPCC1919.01	ppk34	serine/threonine protein kinase Ppk34	0.313034	0.119694
SPBP19A11.07c	0	conserved hypothetical: human down-regulated in multiple cancers-1 homolog 2	0.312914	0.109816
SPAC25H1.04	mug105	conserved hypothetical: DUF1671 family protein	0.312169	0.100997
SPAC323.06c	uba5	ubiquitin activating enzyme	0.311576	0.413673
SPAC25B8.02	0	histone deacetylase complex subunit	0.311084	0.164494
SPBC21C3.08c	0	ornithine aminotransferase	0.310922	0.118807
SPBC646.16	0	20S proteasome component	0.310629	0.280535
SPBC8D2.03c	hhf2	histone H4	0.309648	0.588991
SPAC1006.02	0	WD repeat protein	0.309581	0.124383
SPBC2A9.12	orc6	DNA replication initiation: origin recognition complex subunit Orc6	0.309471	0.106732
SPBC83.10	0	conserved hypothetical: human c15orf24 ortholog	0.308702	0.343321
SPBC106.16	0	20S proteasome component	0.308408	0.157433
SPCC1450.05c	rox3	RNA polymerase II holoenzyme component	0.30805	0.182152
SPAC56F8.05c	mug64	conserved hypothetical: BAR domain protein (predicted)	0.307505	0.0881383
SPAC1A6.02	0	WD repeat protein	0.307315	0.221194
SPAC1B3.01c	0	uracil phosphoribosyltransferase	0.307073	0.0971047
SPAC513.07	0	cinnamoyl-CoA reductase	0.306704	0.355165
SPBC19F8.08	rps401	40S ribosomal protein S4	0.306505	0.00653989
SPBP8B7.17c	0	vitamin metabolism: phosphomethylpyrimidine kinase	0.306024	0.0623696
SPBC2D10.13	est1	telomere maintenance: TPR repeat protein	0.305855	0.317095
SPBC1703.11	0	conserved hypothetical: optic atrophy 3 family protein	0.305667	0.313241
SPAC19D5.10c	0	dubious ORF (sequence orphan)	0.303937	0.188146
SPAC806.07	ndk1	nucleoside diphosphate kinase	0.303272	0.295265
SPBC36.06c	0	ergosterol biosynthesis: farnesyl pyrophosphate synthetase	0.303074	0.0730758
SPBC27B12.09c	0	FAD transporter	0.302975	0.222308
SPAC3G6.04	rnp24	rRNA processing: RNA-binding protein Rnp24	0.302597	0.0239227
SPAC31A2.15c	dcc1	DNA replication: DNA replication factor C complex subunit Dcc1	0.302458	0.122575
SPAC13G7.03	0	up-frameshift suppressor3 family	0.302299	0.358518
SPCC188.06c	srp54	signal recognition particle subunit Srp54	0.301903	0.250825
SPAC1A6.03c	0	fungal cell wall: phospholipase	0.301305	0.111066
SPAC4D7.12c	fet5	transcription factor Fet5	0.300903	0.276279
SPAC3A12.10	rpl2001	60S ribosomal protein L20a	0.30089	0.189732
SPBC21C3.04c	0	mitochondrial ribosomal protein subunit L34	0.300561	0.20364
SPBP8B7.08c	0	leucine carboxyl methyltransferase	0.298989	0.038906
SPAC1D4.04	cct2	chaperonin-containing T-complex beta subunit Cct2	0.298908	0.103082
SPBC1105.09	ubc15	ubiquitin conjugating enzyme	0.298375	0.0865301
SPBP16F5.08c	0	flavin dependent monooxygenase	0.298325	0.132983
SPAC1782.11	met14	adenylyl-sulfate kinase	0.297921	0.204721
SPCC830.10	0	DNA repair protein	0.296891	0.12609
SPAC5D6.06c	0	UDP-GlcNAc transferase associated protein Alg14	0.296718	0.00793274
SPAC6B12.09	trm10	tRNA m(1)G methyltransferase Trm10 (predicted)	0.296658	0.159102
SPBC337.15c	coq7	ubiquinone biosynthesis protein Coq7	0.296463	0.114409
SPCC576.10c	rpt3	19S proteasome regulatory subunit Rpt3	0.296134	0.296034
SPBC36.04	cys11	cysteine synthase	0.295849	0.0895981
SPBC577.11	0	sequence orphan	0.295616	0.591352
SPBC1709.11c	png2	zinc finger protein	0.295447	0.125311
SPCC622.18	rpl6	60S ribosomal protein L6	0.295133	0.202803
SPBC577.15c	sim3	centromere silencing: NASP family CENP-A chaperone	0.295114	0.0754975
SPCC1494.08c	0	conserved fungal protein	0.294891	0.319307
SPCC320.11c	0	RNA-binding protein: ribosome biogenesis	0.294235	0.103598
SPAC9G1.05	0	actin cortical patch: component Aip1 (predicted)	0.29342	0.0601265
SPBC365.05c	slu7	mRNA splicing: zinc finger protein	0.293201	0.0403968
SPAC17H9.20	psc3	mitotic cohesin complex, non-SMC subunit Psc3	0.293059	0.193719
SPBC1703.13c	0	mitochondrial carrier	0.293005	0.035245
SPAC4D7.13	prp40	mRNA splicing: snRNP U1 subunit Prp40	0.292882	0.317748
SPCC16C4.19	0	RNase MRP: mRNA cleavage	0.292747	0.146369
SPCC70.02c	0	ATPase inhibitor	0.292585	0.251809
SPAC4D7.09	tif223	translation initiation factor eIF2B	0.292563	0.23234
SPCC790.02	pep3	late endosome to vacuole transport: zinc finger protein	0.292429	0.0580274
SPAC13D6.03c	0	tRNA (uridine) methyltransferase Trm9 (predicted)	0.292404	0.379963
SPAC1805.06c	hem2	porphobilinogen synthase Hem2	0.292345	0.280501
SPBP22H7.08	rps1002	40S ribosomal protein S10	0.291764	0.229314
SPAC14C4.04	B22918-2	hypothetical	0.29151	0.141849
SPAC1071.09c	0	DNAJ domain protein	0.291456	0.207943
SPBC4B4.01c	0	pantothenate kinase	0.291379	0.136576
SPAC343.13	0	glutamyl-tRNA amidotransferase	0.291349	0.015388
SPCC737.02c	qcr7	ubiquinol-cytochrome-c reductase complex subunit 6	0.290498	0.206615
SPCC553.06	0	oligosaccharyltransferase subunit	0.29039	0.169473
SPAC56E4.02c	alg13	N-acetylglucosaminyldiphosphodolichol N-acetylglucosaminyltransferase Alg13	0.290234	0.321789
SPBPB21E7.08	0	pseudogene	0.290223	0.252337
SPAC19B12.11c	0	zinc finger protein	0.29009	0.310375
SPAC56F8.09	rrp8	rRNA processing: methyltransferase Rrp8	0.289774	0.0837402
SPBC1778.05c	0	sequence orphan	0.28943	0.120245
SPCC1442.06	0	20S proteasome component	0.289372	0.398441
SPAC17G8.04c	arc15	actin cortical patch: ARP2/3 actin-organizing complex subunit Arc15	0.289312	0.242761
SPBC1861.08c	0	mRNA splicing: U2 snRNP-associated protein Lea1 (predicted)	0.289152	0.178967
SPBC646.05c	erg9	ergosterol biosynthesis: squalene synthase Erg9	0.288932	0.356841
SPBC17G9.06c	0	siderophore-iron biosynthesis protein (predicted)	0.288511	0.239425
SPBC2G2.12	0	histidine-tRNA ligase	0.288314	0.135244
SPBC409.05	skp1	SCF ubiquitin ligase complex	0.28741	0.20694
SPCC777.04	0	amino acid transporter	0.285902	0.4136
SPAPB17E12.02	yip12	mRNA splicing: SMN family	0.285862	0.0733011
SPCC1827.05c	0	nucleolar RNA-binding protein NIFK (predicted): ribosome biogenesis	0.285827	0.193863
SPBC17D11.06	spp2	DNA replication: DNA primase large subunit Spp2	0.285426	0.1669
SPBC543.10	get1	calcium signaling/homeostasis: GET complex subunit Get1 (predicted)	0.285413	0.0153425
SPAC10F6.13c	0	aspartate aminotransferase	0.285408	0.200995
SPBC2D10.11c	0	nucleosome assembly protein	0.285361	0.0525446
SPAC9G1.04	oxa101	mitochondrial inner membrane translocase Oxa101	0.284839	0.151911
SPAC630.03	arp3	actin cortical patch/cell polarity: actin-like protein Arp3 (predicted)	0.284036	0.114915
SPAC12B10.06c	0	conserved hypothetical: DUF339 family protein	0.28396	0.151269
SPAC3H1.14	0	cytoplasmic vesicle protein	0.283931	0.319113
SPAC23G3.04	ies4	Ino80 complex subunit:	0.283742	0.150313
SPBC1734.06	rhp18	RAD18 homolog Rhp18	0.283269	0.281753
SPBC17A3.07	pgr1	oxidative stress response: glutathione reductase	0.283213	0.119735
SPAC6F12.06	0	Rho GDP dissociation inhibitor	0.283124	0.122878
SPBC17D11.04c	0	zinc finger protein	0.282869	0.019147
SPBP8B7.01c	0	rRNA processing: RNAseP RNAse MRP subunit Pop7 (predicted)	0.282503	0.117701
SPBC365.13c	hba1	oxidative stress response: Ran GTPase binding protein	0.28221	0.141512
SPBC16E9.06c	uvi31	BolA domain	0.281985	0.158199
SPAC607.06c	0	metallopeptidase	0.281043	0.148182
SPCC126.02c	pku70	telomere maintenance: Ku domain protein	0.280896	0.223118
SPBC800.14c	0	conserved hypothetical: DUF1772 family protein	0.280768	0.105946
SPBC18H10.11c	0	conserved fungal protein	0.280713	0.232514
SPAC23A1.11	rpl1602	60S ribosomal protein L13/L16	0.280664	0.0468303
SPBC3H7.01	spo14	WD repeat protein Spo14	0.279889	0.0602324
SPAC29A4.09	0	rRNA processing: rRNA processing protein Rrp17 (predicted)	0.27977	0.0640978
SPAC7D4.09c	0	steroid dehydrogenase	0.279483	0.120018
SPBC31F10.06c	sar1	ADP-ribosylation factor	0.279368	0.0611944
SPBC1734.02c	cdc27	DNA replication: DNA polymerase delta subunit Cdc27	0.279367	0.373967
SPAC1296.05c	0	cyclin	0.279273	0.073147
SPAC4F10.05c	0	lipoate-protein ligase	0.278927	0.172346
SPCC132.03	0	sequence orphan	0.278926	0.202853
SPBC27.02c	ask1	DASH complex subunit Ask1	0.278907	0.213958
SPCC613.06	rpl902	60S ribosomal protein L9	0.2781	0.202127
SPAC29E6.04	nnf1	kinetochore protein Nnf1	0.277856	0.0248785
SPBC1773.04	0	cinnamoyl-CoA reductase	0.277353	0.176671
SPBC428.05c	arg12	amino acid/arginine biosynthesis: argininosuccinate synthase	0.276807	0.029307
SPAC1834.10c	0	sequence orphan	0.276625	0.280071
SPBC359.05	0	ABC transporter family	0.276614	0.00747907
SPAC821.11	pro1	gamma-glutamyl phosphate reductase Pro1	0.275915	0.379546
SPBC32H8.08c	0	mannosyltransferase complex subunit	0.275809	0.143899
SPCC1682.04	cdc31	centrin	0.275433	0.10394
SPAC9.02c	0	N-acetyltransferase	0.275194	0.196447
SPAC11D3.11c	0	pseudogene	0.275047	0.213374
SPBC146.12	coq6	monooxygenase Coq6	0.274597	0.115674
SPCC1919.02	0	phospholipid biosynthesis: pig-X	0.274111	0.0343603
SPAC688.02c	mis14	kinetochore protein Mis14	0.274083	0.163487
SPAC17G8.07	0	YEATS family protein	0.273674	0.181337
SPBC18H10.10c	cwc16	mRNA splicing: complexed with Cdc5p	0.273348	0.202988
SPBC1198.11c	reb1	RNA polymerase I transcription termination factor Reb1	0.272757	0.20113
SPBP8B7.25	cyp4	cyclophilin	0.272747	0.122798
SPCC1827.06c	0	aspartate semialdehyde dehydrogenase	0.272648	0.064039
SPBC30D10.18c	rpl102	60S ribosomal protein L10	0.272503	0.344735
SPAC664.12c	0	conserved hypothetical: LYR family protein	0.272439	0.0984727
SPCC16C4.05	0	rRNA/tRNA processing: RNase P and RNase MRP subunit	0.272208	0.0834585
SPBC1734.01c	esf1	rRNA processing: pre-rRNA processing protein Esf1 (predicted)	0.272189	0.105798
SPBC1711.03	0	conserved eukaryotic protein	0.272084	0.119234
SPCC285.16c	msh6	MutS protein homolog	0.272012	0.137109
SPBC23G7.16	ctr6	copper transporter	0.271625	0.151528
SPAC1687.21	0	glycolysis: phosphoglycerate mutase family	0.271202	0.156623
SPAC1834.06c	pmo25	regulator of cell separation/cytokinesis: mo25 family protein Pmo25	0.270745	0.133709
SPBC776.09	ste13	ATP-dependent RNA helicase Ste13	0.270695	0.251715
SPCC16C4.08c	skb15	Shk1 kinase binding protein 15	0.270554	0.259987
SPCC1450.09c	0	fungal cell wall: phospholipase	0.270273	0.131897
SPBC776.12c	hsk1	DNA replication initiation: serine/threonine protein kinase Hsk1	0.270019	0.125822
SPBPB10D8.07c	0	malate permease	0.269935	0.215383
SPAC23A1.09	0	mRNA splicing: rrm RNA recognition motif	0.26978	0.335022
SPAC1834.01	sup45	translation release factor eRF1	0.269608	0.177604
SPAC1F12.02c	p23fy	translationally controlled tumor protein homolog	0.269467	0.228039
SPCC1450.03	0	rRNA processing: ribonucleoprotein (RNP) complex (predicted)	0.269428	0.0287234
SPAC12B10.09	0	mitochondrial carrier	0.269229	0.120017
SPBC337.09	erg28	ergosterol biosynthesis: Erg28 protein	0.268538	0.065802
SPCC4G3.06c	mrpl4	mitochondrial ribosomal protein subunit L4	0.268188	0.088466
SPBC1271.04c	0	deoxyhypusine synthase	0.268102	0.204816
SPBC2D10.09	0	3-hydroxyisobutyryl-CoA hydrolase	0.26729	0.243504
SPBC3B9.19	mge1	GrpE domain chaperone protein	0.267251	0.229122
SPAC227.04	0	autophagy C terminal domain family	0.267241	0.314707
SPBC18H10.15	ppk23	serine/threonine protein kinase Ppk23	0.267207	0.0805693
SPBC13G1.03c	pex14	peroxisomal membrane anchor protein	0.266666	0.0881076
SPBC36B7.05c	0	zinc finger protein	0.266558	0.189662
SPCC965.05c	thp1	uracil DNA N-glycosylase Thp1	0.266422	0.137444
SPAC1F12.10c	0	cytochrome b5 family	0.265404	0.127177
SPBC1683.07	mal1	alpha-glucosidase Mal1	0.265369	0.05451
SPAC29B12.05c	0	S-adenosylmethionine-dependent methyltransferase	0.265087	0.247176
SPBC1778.07	0	methyltransferase	0.264989	0.129148
SPBC14C8.12	rpb8	DNA-directed RNA polymerase I, II and III subunit Rpb8	0.264611	0.140895
SPCC736.02	0	sequence orphan	0.264516	0.19156
SPBC19C2.12	mrpl51	mitochondrial ribosomal protein subunit L51	0.264444	0.319997
SPBC582.10c	0	DEAD/DEAH box helicase	0.264434	0.0556155
SPBC2D10.03c	0	conserved hypothetical: DUF866 domain protein	0.264008	0.129238
SPBP35G2.09	usp103	mRNA splicing: U1 snRNP-associated protein	0.26395	0.137588
SPAPB1A10.15	0	Arv1-like family protein	0.262884	0.106545
SPBC2G2.13c	0	deoxycytidylate deaminase	0.262704	0.267293
SPBC4B4.09	prp39	mRNA splicing: U1 snRNP-associated protein	0.262039	0.030272
SPBC337.05c	cct8	chaperonin-containing T-complex theta subunit Cct8	0.261263	0.226105
SPBC1347.02	fkbp39	peptidyl-prolyl cis-trans isomerase	0.261053	0.287291
SPBC660.08	0	sequence orphan (mitochondrion): role in meiosis	0.260927	0.0209899
SPBC16A3.19	0	histone acetyltransferase complex subunit	0.260745	0.234148
SPAC6B12.13	0	protein phosphatase inhibitor	0.25984	0.0292408
SPCC1322.15	rpl3402	60S ribosomal protein L34	0.25974	0.01578
SPAC15A10.15	sgo2	shugoshin	0.259713	0.180254
SPCC4G3.08	psk1	serine/threonine protein kinase Psk1	0.259423	0.152026
SPCC757.05c	0	peptidase family M20	0.259052	0.0640982
SPCC18B5.11c	cds1	DNA replication initiation: replication checkpoint kinase Cds1	0.258812	0.187594
SPAC1F12.08	0	cytidylyltransferase	0.258577	0.148317
SPBC1271.11	0	mitochondrial carrier	0.257765	0.0945985
SPBC16D10.10	0	tRNA specific adenosine deaminase subunit	0.257159	0.387384
SPAC22H12.02	tfg3	YEATS family protein	0.256867	0.393962
SPCC290.02	rpc34	DNA-directed RNA polymerase III complex subunit Rpc34	0.256417	0.0858917
SPCC1739.02c	mrpl22	mitochondrial ribosomal protein subunit L22	0.256267	0.158583
SPAC25H1.06	0	WD repeat protein	0.256118	0.176854
SPAC2C4.04c	0	conserved eukaryotic protein	0.255844	0.0687264
SPAC3C7.09	set8	lysine methyltransferase Set8	0.255291	0.0118307
SPCC16C4.18c	taf50	histone H4-like TAF	0.255252	0.144665
SPBC9B6.10	cdc37	chaperone	0.254529	0.0148956
SPBC23E6.05	arx1	ribosomal export complex Arx1	0.254344	0.161046
SPBC409.15	0	rRNA processing: rRNA processing protein Tsr2 (predicted)	0.254294	0.140721
SPAC5D6.13	0	Golgi phosphoprotein 3 family	0.254258	0.0529022
SPAC4F10.04	0	protein phosphatase type 2A, intrinsic regulator	0.254232	0.0179383
SPCC70.07c	tmp1	thymidylate kinase Tmp1	0.253945	0.0782229
SPCC1259.04	iec3	Ino80 complex subunit	0.253487	0.346933
SPBC15D4.09c	0	cystathionine gamma-synthase	0.253465	0.0824567
SPAC23H4.08	0	interacts with RNA Polymerase II	0.253333	0.127147
SPBC11B10.06	sws1	zinc finger protein	0.252435	0.103574
SPAC1782.12c	0	conserved hypothetical: DUF423 protein	0.252196	0.344916
SPBC20F10.06	mad2	mitotic spindle checkpoint: horma domain protein	0.251997	0.0372841
SPAC25B8.09	0	trans-aconitate 3-methyltransferase	0.251241	0.074461
SPCC1620.13	0	glycolysis: phosphoglycerate mutase family	0.251011	0.135876
SPAC11H11.03c	0	conserved hypothetical: SMR and DUF1771 domain protein	0.250717	0.137343
SPAPJ691.03	0	DUF543	0.250658	0.300113
SPBC16E9.19	0	sequence orphan	0.249623	0.0725828
SPAC22H10.10	alp21	tubulin specific chaperone	0.249165	0.0702435
SPAC4H3.01	0	DNAJ domain protein	0.248267	0.204381
SPAC732.02c	0	6-phosphofructo-2-kinase	0.248144	0.133342
SPBC1711.11	0	autophagy associated protein (predicted)	0.247937	0.329836
SPAC4G8.06c	trm12	tRNA methyltransferase Trm12	0.247861	0.063819
SPBC26H8.03	cho2	phospholipid biosynthesis: phosphatidylethanolamine N-methyltransferase Cho2	0.247313	0.130561
SPAC22F3.03c	rdh54	DEAD/DEAH box helicase	0.247129	0.106061
SPCC1919.14c	bdp1	transcription factor TFIIIB complex subunit Bdp1	0.246949	0.0820318
SPCC1259.01c	rps1802	40S ribosomal protein S18	0.246885	0.180642
SPCC645.03c	isa1	iron ion homeostasis: iron-sulfur protein	0.246867	0.0985046
SPBC4F6.09	str1	iron ion homeostasis: siderophore-iron transporter Str1	0.24651	0.0641417
SPAC25B8.01	dap1	ergosterol biosynthesis:MAPR family steroid-binding protein	0.246345	0.0888519
SPBC1198.13c	tfg2	transcription factor TFIIF complex beta subunit Tfg2	0.24476	0.099439
SPBC1271.12	kes1	oxysterol binding protein	0.244568	0.178691
SPAC6F12.04	0	COPI-coated vesicle associated protein	0.244395	0.278656
SPBP23A10.12	0	conserved hypothetical: FRG1 family protein; nucleolus	0.244309	0.0817465
SPBC32F12.05c	cwf12	mRNA splicing: complexed with Cdc5p	0.243938	0.179367
SPAC1486.09	0	26S proteasome binding	0.243707	0.192476
SPBP4H10.04	ppb1	cell polarity: serine/threonine protein phosphatase Ppb1	0.243697	0.0765345
SPBC336.06c	rnh1	ribonuclease H Rnh1	0.243302	0.165606
SPCC338.05c	mms2	ubiquitin conjugating enzyme	0.242991	0.190869
SPCC338.03c	0	dubious ORF	0.242641	0.0902471
SPAC23C11.08	php3	CCAAT-binding factor complex subunit Php3	0.242367	0.294829
SPAPB8E5.09	0	AAA family ATPase	0.242353	0.395663
SPBC1604.16c	0	RNA-binding protein, G-patch type (predicted)	0.242292	0.0365766
SPBC15C4.03	0	Rab geranylgeranyl-transferase escort protein	0.242053	0.317508
SPAC19A8.07c	0	rRNA processing: U3 snoRNP-associated protein Imp4 (predicted)	0.241938	0.193816
SPBC32F12.11	tdh1	glycolysis/oxidative stress response: glyceraldehyde-3-phosphate dehydrogenase Tdh1	0.241692	0.246287
SPAC23H3.03c	0	nitrogen permease regulator family	0.241616	0.156768
SPAPB21F2.03	0	rRNA processing: ribosome biogenesis protein (predicted)	0.241537	0.275666
SPAC343.06c	0	scramblase	0.241468	0.213832
SPAC6F12.17	rna14	mRNA polyadenylation: mRNA cleavage and polyadenylation specificity factor component	0.241366	0.0399967
SPBC1347.09	0	hexaprenyldihydroxybenzoate methyltransferase	0.240819	0.0693317
SPBC3E7.15c	0	sphingosine N-acyltransferase	0.240727	0.105235
SPAC1851.02	0	phospholipid biosynthesis: fatty acyltransferase	0.240709	0.201141
SPBC646.07c	0	fatty acid biosynthesis: 3-oxo-5-alpha-steroid 4-dehydrogenase	0.240683	0.257973
SPAC23G3.10c	ssr3	transcription factor	0.240678	0.147612
SPAC8E11.02c	rad24	14-3-3 protein Rad24	0.23897	0.39054
SPCC16C4.04	0	sequence orphan	0.237813	0.220244
SPBC8E4.03	0	arginase family	0.23775	0.249539
SPBC725.08	0	transcription factor	0.237551	0.150221
SPCC1183.03c	0	iron ion homeostasis: frataxin homolog	0.237456	0.111828
SPBC337.02c	0	pseudogene	0.237281	0.12216
SPAP27G11.04c	0	tRNA-specific adenosine deaminase subunit	0.23724	0.0181242
SPCC777.06c	0	conserved hypothetical: hydrolase (predicted)	0.236968	0.483188
SPBC11B10.04c	mrps28	mitochondrial ribosomal protein subunit S28	0.23665	0.0491835
SPBC14F5.05c	sam1	S-adenosylmethionine synthetase	0.236548	0.34443
SPAC1002.14	itt1	zinc finger protein	0.236475	0.0147169
SPAC1783.02c	vps66	acyltransferase	0.23615	0.145869
SPAC1A6.08c	mug125	sequence orphan	0.235897	0.222707
SPAC24C9.03	mvd1	ergosterol biosynthesis: diphosphomevalonate decarboxylase	0.235088	0.196137
SPBC16E9.02c	0	CUE domain protein	0.234729	0.13757
SPAC6F6.03c	0	GTP binding protein associated	0.234469	0.0683136
SPAC637.11	suv3	ATP-dependent RNA helicase Suv3	0.2344	0.0299355
SPCC74.01	sly1	sec1 family	0.234381	0.0287071
SPBP4H10.05c	spe2	S-adenosylmethionine decarboxylase proenzyme Spe2	0.233661	0.0808431
SPAC22A12.05	rpc11	DNA-directed RNA polymerase III complex subunit Rpc11	0.233518	0.0618348
SPAC3A12.13c	0	rRNA processing: translation initiation factor eIF3j (p35) (predicted)	0.233363	0.149096
SPAC6F6.10c	arc2	actin cortical patch: ARP2/3 actin-organizing complex subunit Arc34	0.233336	0.0267209
SPBC428.15	0	GTP binding protein	0.233151	0.0802009
SPAC1782.04	cox24	mitochondrial mRNA processing protein Cox24	0.232855	0.229427
SPAC1556.01c	rad50	telomere maintenance: DNA repair protein Rad50	0.232245	0.049791
SPAC22H12.03	0	esterase/lipase	0.232175	0.0876764
SPAC1039.07c	0	2,2-dialkylglycine decarboxylase	0.232098	0.201527
SPAC8C9.05	0	D-Tyr-tRNA deacylase	0.229863	0.0299845
SPAC4G9.11c	cmb1	cytosine-mismatch binding protein 1	0.229848	0.164345
SPAC22A12.12c	0	rRNA processing: exosome subunit Rrp40 (predicted)	0.229624	0.0816216
SPCC895.04c	ufe1	SNARE	0.229066	0.209673
SPBC16G5.01	rpn12	19S proteasome regulatory subunit	0.228234	0.0542962
SPAC26A3.08	smb1	mRNA splicing: Sm snRNP core protein Smb1	0.228137	0.318737
SPBC2G2.10c	mug110	sequence orphan	0.227574	0.275204
SPBC365.04c	0	RNA-binding protein, involved in ribosome biogenesis (predicted)	0.227406	0.0782024
SPAPB24D3.04c	mag1	DNA-3-methyladenine glycosylase Mag1	0.227229	0.0852125
SPBC13E7.06	msd1	mitotic-spindle disanchored Msd1/mug172	0.227039	0.111271
SPAC27E2.02	0	IMPACT homolog	0.226443	0.197254
SPBC16C6.10	chp2	centromere silencing: chromodomain protein 2	0.226147	0.249018
SPBC405.04c	ypt7	late endosome to vacuole transport: GTPase Ypt7	0.226141	0.165929
SPBC32F12.03c	gpx1	oxidative stress response: glutathione peroxidase Gpx1	0.225177	0.025474
SPAC144.08	0	co-chaperone	0.225087	0.0974404
SPBC19G7.18c	0	sequence orphan (mitochondrion)	0.224727	0.251095
SPAC17C9.08	pnu1	endodeoxyribonuclease Pnu1	0.223729	0.131414
SPAC1486.07c	mrpl19	mitochondrial ribosomal protein subunit L19	0.223144	0.153557
SPAC15F9.02	seh1	nucleoporin	0.223109	0.281743
SPAC31G5.01	sap49	mRNA splicing: RNA-binding protein	0.222784	0.301955
SPBC649.03	rhp14	XP-A family homolog Rhp14	0.222451	0.026397
SPAC821.06	spn2	septin	0.221798	0.08751
SPBC21.01	mis17	kinetochore protein Mis17	0.221753	0.120061
SPCC663.17	wtf15	wtf element, pseudogene	0.221616	0.246794
SPBC2G5.01	0	conserved hypothetical: DUF1682 family protein	0.220893	0.127903
SPAC140.02	gar2	rRNA processing: GAR family	0.220541	0.242648
SPBC1709.10c	0	metallochaperone	0.220539	0.156197
SPBC1711.13	his2	histidinol dehydrogenase His2	0.220216	0.157248
SPAC17H9.07	0	signal recognition particle subunit Srp21	0.219958	0.227847
SPBC27B12.10c	tom7	mitochondrial TOM complex subunit Tom7	0.219749	0.886914
SPBC4.07c	rpt2	19S proteasome regulatory subunit	0.219529	0.0430735
SPAC10F6.12c	mam4	protein-S isoprenylcysteine O-methyltransferase Mam4	0.219484	0.0801349
SPACUNK4.06c	rpb7	DNA-directed RNA polymerase complex II subunit Rpb7	0.21934	0.0409315
SPBC215.10	0	haloacid dehalogenase-like hydrolase	0.218957	0.03465
SPBC1198.08	0	peptidase family M20	0.217499	0.125624
SPAC57A10.07	0	conserved protein (fungal and protazoan)	0.217241	0.0903176
SPAC22E12.04	ccs1	metallochaperone	0.216879	0.219752
SPBC28F2.08c	0	SEL1 repeat protein	0.216742	0.201212
SPAC3H5.06c	pol1	DNA replication initiation: DNA polymerase alpha catalytic subunit	0.21662	0.0797095
SPBC4B4.07c	usp102	mRNA splicing: U1 snRNP-associated protein Usp102	0.2165	0.122358
SPBC1773.01	0	striatin homolog	0.216491	0.100316
SPAPB17E12.12c	0	mitochondrial transporter	0.216452	0.379183
SPAC1B3.06c	0	methyltransferase	0.216431	0.131182
SPBC1685.04	0	sequence orphan: SPB	0.216379	0.0827846
SPCC1442.15c	cox18	mitochondrial inner membrane protein Cox18	0.215681	0.123312
SPBC365.01	0	sec14 cytosolic factor family	0.215236	0.17056
SPAC15E1.06	vps29	metallophosphatase	0.214243	0.299501
SPAC16E8.06c	nop12	rRNA processing: RNA-binding protein	0.214165	0.0515748
SPBC409.13	0	vitamin metabolism: 6,7-dimethyl-8-ribityllumazine synthase: riboflavin biosynthesis	0.213812	0.136221
SPAC140.01	sdh2	aerobic respiration: succinate dehydrogenase	0.213708	0.118735
SPAPB1A10.04c	cwp1	1,3-beta-glucan biosynthesis: geranylgeranyltransferase I alpha subunit Cwp1	0.21267	0.0618327
SPBC1289.02c	uap2	mRNA splicing: U2 snRNP-associated protein Uap2	0.21264	0.146638
SPCP1E11.08	0	ribosome biogenesis protein	0.211364	0.170057
SPAC56F8.04c	coq2	para-hydroxybenzoate--polyprenyltransferase Coq2	0.211287	0.0814407
SPCC126.10	iah1	isoamyl acetate hydrolytic enzyme Iah1	0.211177	0.00453218
SPAC13C5.02	dre4	DNA replication: WW domain	0.210956	0.106905
SPAC1556.02c	sdh1	aerobic respiration: succinate dehydrogenase Sdh1	0.210586	0.222254
SPAC4A8.06c	0	esterase/lipase	0.210545	0.134182
SPBC11G11.03	0	rRNA processing: 60S acidic ribosomal protein	0.210424	0.122342
SPCC338.15	0	dolichyl-di-phosphooligosaccharide-protein glycotransferase subunit	0.210407	0.124578
SPBC13E7.04	atp16	F1-ATPase delta subunit	0.21011	0.0396862
SPBPB21E7.09	0	L-asparaginase	0.209868	0.0487353
SPBC26H8.12	0	cytochrome c heme lyase	0.209166	0.23515
SPBC16H5.14c	0	short chain dehydrogenase	0.208823	0.265275
SPAC17G6.17	pof8	F-box protein	0.208736	0.290069
SPBC1734.05c	spf31	DNAJ domain protein	0.208302	0.403792
SPBC405.03c	0	membrane transporter (predicted)	0.207954	0.0383188
SPBC83.09c	0	GYF domain	0.207596	0.143704
SPAC644.09	0	alanine racemase	0.207183	0.233312
SPBC1539.03c	0	amino acid/arginine biosynthesis: argininosuccinate lyase	0.206946	0.131073
SPAC6B12.10c	spp1	telomere maintenance: DNA primase catalytic subunit Spp1	0.20657	0.0637388
SPCC1494.04c	tyr1	prephenate dehydrogenase [NADP+]	0.206338	0.19302
SPBC2D10.20	ubc1	ubiquitin conjugating enzyme	0.205979	0.182313
SPAC29A4.08c	prp19	mRNA splicing: ubiquitin-protein ligase E4	0.205798	0.145577
SPBC17A3.03c	0	phosphoprotein phosphatase	0.205464	0.0615371
SPCC18.13	0	WD repeat protein	0.205441	0.188734
SPAC3F10.15c	spo12	spo12 family protein	0.205041	0.0812284
SPAC23D3.01	pdp3	PWWP domain protein: histone H4-K20 methylation	0.205013	0.0138686
SPAC25B8.06c	0	serine-tRNA ligase	0.204774	0.0833002
SPBC29A3.13	pdp1	PWWP domain protein: histone H4-K20 methylation; DNA damage	0.204745	0.13105
SPBC9B6.04c	tuf1	mitochondrial translation elongation factor EF-Tu Tuf1	0.204697	0.252682
SPBC29A10.06c	0	conserved fungal protein	0.204404	0.16992
SPCC16A11.16c	0	ARM1 family	0.203857	0.323268
SPAC17G8.10c	dma1	mitotic spindle checkpoint: mitotic spindle checkpoint component Dma1	0.202745	0.186507
SPCC126.12	0	DUF34	0.202289	0.228022
SPAC7D4.07c	trx1	oxidative stress response/redox homeostasis: thioredoxin Trx1	0.201951	0.204487
SPBC2G5.07c	rpc25	DNA-directed RNA polymerase III complex subunit Rpc25	0.201785	0.421525
SPAC12B10.02c	0	sequence orphan	0.201169	0.298557
SPBC1289.03c	spi1	Ran GTPase Spi1	0.200722	0.0723398
SPCC4G3.04c	coq5	aerobic respiration: C-methytransferase	0.200414	0.122872
SPAC2C4.09	0	DUF1640	0.200341	0.160597
SPBC1778.06c	fim1	actin cortical patch/cell polarity: fimbrin	0.200144	0.228204
SPBC1683.10c	pcl1	iron ion homeostasis: ferrous iron transporter	0.200109	0.185764
SPAC3G9.04	ssu72	phosphoric ester hydrolase	0.199988	0.143851
SPAC630.10	0	conserved fungal protein	0.19972	0.101441
SPCC830.06	0	calcineurin regulatory subunit	0.199507	0.171455
SPBC244.02c	0	rRNA processing: U3 snoRNP-associated protein Utp6 (predicted)	0.19926	0.136378
SPAC824.06	tim14	TIM23 translocase complex subunit Tim14	0.199089	0.107618
SPAC20G4.05c	0	conserved hypothetical: UPF0061 family protein	0.198705	0.360956
SPAC1782.05	0	phosphotyrosyl phosphatase activator homolog	0.198581	0.0607774
SPAC23H4.07c	srp102	signal recognition particle receptor beta subunit Srp102	0.198358	0.253316
SPBC28F2.11	0	chromatin remodeling complex subunit	0.198287	0.087132
SPAC19A8.11c	0	recombination protein Irc6 (predicted)	0.198211	0.194072
SPAP7G5.02c	gua2	GMP synthase [glutamine-hydrolyzing]	0.197715	0.0793383
SPAC3F10.12c	0	basic helix-loop-helix	0.197708	0.0973629
SPCC550.08	0	N-acetyltransferase	0.19767	0.081262
SPBC19F5.05c	ppp1	pescadillo-family	0.197564	0.278381
SPCC364.03	rpl1702	60S ribosomal protein L17	0.197545	0.309295
SPAC22E12.18	0	conserved fungal protein	0.197534	0.0935529
SPBC1734.08	hse1	late endosome to vacuole transport: STAM like protein	0.19748	0.156337
SPAC17G6.08	pep7	zinc finger protein	0.197272	0.179107
SPAC144.15c	cog1	Golgi retrograde transport complex subunit	0.1971	0.119145
SPAC2F3.18c	0	conserved hypothetical	0.196752	0.0207223
SPBC8D2.15	0	lipoic acid synthetase	0.196298	0.0954882
SPAC589.07c	0	WD repeat protein	0.19605	0.128994
SPAC29E6.05c	0	oxidative stress response: peptide methionine sulfoxide reductase	0.195993	0.369988
SPAC3H1.01c	orp3	DNA replication initiation: origin recognition complex subunit Orp3	0.195333	0.200729
SPCC737.05	0	pex24 family	0.19524	0.250411
SPBC543.07	pek1	MAP kinase kinase Pek1	0.194927	0.0996203
SPCC663.12	cid12	centromere silencing/mitotic spindle checkpoint: RNA-directed RNA polymerase complex subunit Cid12	0.194745	0.481883
SPAC17A2.04c	0	HSP chaperone complex subunit	0.194595	0.0468987
SPAC2C4.15c	ubx2	UBX domain	0.193988	0.0594157
SPAC24H6.01c	0	phospholipid biosynthesis: O-acyl transferase	0.193815	0.200981
SPCC736.05	wtf7	wtf element	0.193478	0.268479
SPAC17G8.03c	dpb3	DNA replication: DNA polymerase epsilon subunit Dpb3	0.193404	0.0663207
SPBC17A3.10	pas4	zinc finger protein	0.192567	0.0978958
SPAC4G8.08	0	mitochondrial carrier	0.192467	0.259991
SPAC13C5.05c	0	N-acetylglucosamine-phosphate mutase	0.191932	0.0622066
SPBC354.12	gpd3	glycolysis: glyceraldehyde 3-phosphate dehydrogenase Gpd3	0.191826	0.824661
SPBC1306.02	0	WD repeat protein	0.191584	0.119368
SPAC18G6.07c	mra1	rRNA processing: nucleolar protein	0.191528	0.0929535
SPAC1952.02	0	G-patch domain	0.191434	0.149841
SPCC24B10.19c	0	sequence orphan	0.191307	0.190911
SPBC1604.05	pgi1	glycolysis: glucose-6-phosphate isomerase	0.190682	0.15493
SPBC1198.09	ubc16	ubiquitin conjugating enzyme	0.190577	0.052754
SPAC23C4.06c	0	methyltransferase	0.190406	0.298524
SPAC17C9.05c	pmc3	mediator complex subunit Pmc3	0.190383	0.225889
SPBP4H10.18c	0	sequence orphan (mitochondrion)	0.190345	0.435124
SPBC577.14c	spa1	ornithine decarboxylase antizyme Spa1	0.190288	0.184962
SPAC4A8.08c	vas1	valine-tRNA ligase Vas1	0.190158	0.162037
SPBC2D10.07c	0	mitochondrial inner membrane peptidase complex	0.190026	0.0877128
SPAC19G12.11	coq9	aerobic respiration: ubiquinone biosynthesis protein Coq9	0.189834	0.105253
SPAC26F1.14c	aif1	apoptosis-inducing factor homolog Aif1	0.189683	0.0976352
SPAC17A2.03c	vma6	V-type ATPase	0.189631	0.158877
SPCC613.01	0	membrane transporter	0.188981	0.147361
SPBC776.07	0	aerobic respiration: mitochondrial Mam33 family protein: aerobic respiration	0.188846	0.321918
SPBC14C8.09c	0	conserved hypothetical: IMPACT homolog; same as SPBC14C8.08c	0.188466	0.152688
SPCC14G10.03c	ump1	proteasome maturation factor Ump1	0.187709	0.328389
SPAC630.07c	0	sequence orphan	0.186759	0.00850243
SPBC1539.08	0	ADP-ribosylation factor	0.186313	0.102918
SPAC22F8.09	rrp16	rRNA processing: ribosomal RNA processing protein	0.18623	0.131975
SPBC21D10.07	0	UPF0287	0.185159	0.105312
SPBP18G5.02	0	phospholipid biosynthesis: CDP-diacylglycerol-glycerol-3-phosphate 3-phosphatidyltransferase	0.184873	0.0379306
SPBC26H8.08c	grn1	rRNA processing: GTPase	0.184379	0.129181
SPAC1002.15c	pmc5	mediator complex subunit Pmc5	0.184197	0.00422316
SPAC23C4.13	bet1	SNARE	0.184049	0.0350151
SPCC18.07	rpc53	DNA-directed RNA polymerase III complex subunit Rpc53	0.184049	0.0526372
SPBC30D10.03c	0	IMP 5'-nucleotidase	0.183893	0.175435
SPAC21E11.04	ppr1	oxidative stress response: L-azetidine-2-carboxylic acid acetyltransferase	0.183781	0.239659
SPAC31G5.08	ups1	uroporphyrinogen-III synthase Ups1	0.183725	0.120533
SPAC2F7.15	rsm24	mitochondrial ribosomal protein subunit S24	0.183605	0.204261
SPCC1223.14	0	chorismate synthase	0.183595	0.278771
SPCC663.11	dif1	conserved hypothetical: ww domain binding protein 11 (wbp11) ortholog (mRNA processing)	0.183472	0.0849063
SPAC343.02	img1	mitochondrial ribosomal protein subunit L19	0.18307	0.197542
SPAC222.06	mak16	nuclear HMG-like acidic protein	0.183012	0.0183195
SPCC24B10.14c	xlf1	xrcc4 like factor, cernunnon: DSB repair	0.182458	0.11977
SPCC63.12c	0	20S proteasome component	0.18219	0.0474869
SPCC1739.04c	0	sequence orphan	0.182022	0.154984
SPAC22G7.05	0	Krr family protein	0.182011	0.10821
SPAC17C9.14	0	Pex19 protein family	0.181768	0.0668136
SPAC1006.07	0	translation initiation factor eIF4A	0.1817	0.243966
SPAC1805.02c	0	electron transfer flavoprotein beta subunit	0.181483	0.104812
SPAC17H9.12c	0	ergosterol biosynthesis: NADH-cytochrome reductase	0.181397	0.171562
SPAC11D3.01c	0	conserved hypothetical (similar to N. crassa conidiation-specific protein 6)	0.18103	0.110557
SPAP8A3.06	0	mRNA splicing: U2AF small subunit	0.180957	0.14187
SPBC2A9.05c	0	conserved hypothetical: DUF846 family protein	0.180868	0.335057
SPCC320.09	hem15	ferrochelatase	0.180479	0.15173
SPBC365.10	0	actin-like protein	0.180418	0.118932
SPAC17G8.13c	mst2	telomere maintenance: histone acetyltransferase Mst2	0.180095	0.171615
SPAC2C4.13	vma16	V-type ATPase	0.179945	0.173771
SPCC11E10.02c	gpi8	phospholipid biosynthesis: pig-K	0.179878	0.159974
SPBC17D1.04	acr1	upstream activation factor complex subunit (RNA pol I)	0.179731	0.162755
SPCC24B10.10c	0	AAA family ATPase	0.179516	0.169656
SPCC4B3.11c	0	BolA domain	0.179312	0.256666
SPBP8B7.11	nxt3	Ubiquitin protease cofactor	0.179049	0.126241
SPBP35G2.08c	0	zinc finger protein	0.178642	0.0318775
SPBC1711.09c	0	SNARE associated Golgi protein (predicted)	0.178375	0.261735
SPAC22E12.13c	rpl2403	60S ribosomal protein L24-3	0.177618	0.346078
SPCC1494.01	0	iron/ascorbate oxidoreductase family	0.177533	0.323985
SPAC23C4.03	0	haspin related kinase	0.177136	0.157812
SPAC4F8.06	0	mitochondrial ribosomal protein subunit S12	0.176941	0.442595
SPAP8A3.03	0	zinc ion homeostasis: ZIP zinc transporter domain	0.17692	0.309926
SPBC18E5.04	rpl1001	60S ribosomal protein L10	0.17673	0.344837
SPBC11B10.03	0	Golgi transport complex subunit	0.176608	0.324758
SPBP35G2.13c	swc2	chromatin remodeling complex subunit Swc2	0.175929	0.0828123
SPAC144.13c	srw1	CDK inhibitor Srw1	0.17582	0.00922756
SPCC330.12c	sdh3	aerobic respiration: succinate dehydrogenase	0.175289	0.037588
SPCC306.07c	0	U3 snoRNP-associated protein Cic1/Utp30 family (predicted): ribosomal biogenesis	0.175233	0.213749
SPAP14E8.04	oma1	metallopeptidase	0.174938	0.133946
SPBC3B9.06c	apg3	autophagy associated protein Apg3	0.174424	0.0801596
SPAC27F1.05c	0	aminotransferase	0.174289	0.0817701
SPBC2A9.11c	0	nuclear export factor (predicted)	0.17413	0.25318
SPAC3H5.04	aar2	mRNA splicing: U5 snRNP-associated protein Aar2	0.172376	0.0780812
SPBC30D10.13c	pdb1	pyruvate dehydrogenase e1 component	0.17208	0.12883
SPBC418.01c	his4	imidazoleglycerol phosphate synthase	0.171869	0.260195
SPAC959.04c	0	mannosyltransferase complex subunit	0.171497	0.16253
SPAC1142.02c	0	conserved hypothetical: TPR repeat protein, SGT family	0.171278	0.198784
SPAC23A1.15c	0	SNARE	0.171214	0.0282827
SPAC22H10.12c	gdi1	GDP dissociation inhibitor	0.171088	0.129318
SPCC18B5.06	erf1	translation release factor eRF1	0.170646	0.178407
SPAC30C2.02	mmd1	microtubule movement: deoxyhypusine hydroxylase	0.170613	0.24832
SPAC3G9.15c	fcf2	rRNA processing: rRNA processing protein Fcf2 (predicted)	0.168858	0.153165
SPAC25H1.02	jmj1	jmjC domain	0.168742	0.0461917
SPAC29A4.03c	0	mitochondrial ribosomal protein subunit S9	0.167707	0.375142
SPBC18H10.06c	swd2	COMPASS complex subunit Swd1	0.167595	0.116924
SPCC4G3.05c	mus81	DNA replication initiation: Holliday junction resolvase subunit Mus81	0.16707	0.0551778
SPAC19G12.13c	poz1	telomere maintenance: Pot1 associated protein (negative regulation of telomerase)	0.166908	0.0893187
SPAC12G12.11c	0	conserved hypothetical: DUF544 domain, interacts with SPB sad1	0.166442	0.248718
SPBC685.06	rps001	40S ribosomal protein S0A	0.165874	0.151476
SPBC26H8.13c	0	sequence orphan	0.165864	0.268521
SPAC607.07c	0	sequence orphan	0.165807	0.320725
SPBC428.02c	eca39	amino acid/isoleucine synthesis: branched chain amino acid aminotransferase Eca49	0.165476	0.245241
SPAC222.12c	atp2	F1-ATPase beta subunit	0.165426	0.124181
SPAC13G6.09	0	zinc finger protein	0.164656	0.00116558
SPAC4G9.03	adk1	adenylate kinase Adk1	0.164579	0.0739244
SPAC1A6.05c	0	triacylglycerol lipase	0.164177	0.0184306
SPBC1734.13	atp3	F1-ATPase gamma subunit	0.163898	0.199006
SPAC1782.02c	0	conserved fungal protein	0.163678	0.0780819
SPAC343.18	0	zinc finger protein	0.163653	0.0896298
SPAC29A4.04c	0	rRNA processing: pseudouridylate synthase	0.163578	0.345843
SPBP23A10.08	alp5	centromere silencing: actin-like protein	0.163501	0.157106
SPCC1682.10	rpn8	19S proteasome regulatory subunit	0.163234	0.267115
SPAC57A10.12c	ura3	dihydroorotate dehydrogenase Ura3	0.162992	0.094336
SPBC21H7.05	sfc6	transcription factor TFIIIC complex	0.1621	0.0303737
SPAC1002.02	0	nucleoporin	0.161879	0.113662
SPCC18B5.02c	0	pseudogene	0.161436	0.644972
SPAC10F6.14c	0	ABC1 kinase family protein	0.161232	0.101721
SPAC23H3.05c	swd1	WD repeat protein	0.160979	0.249848
SPBC115.01c	rrp46	rRNA processing: exosome subunit	0.16078	0.00201719
SPCP31B10.02	0	conserved eukaryotic protein	0.160624	0.153091
SPCC162.01c	0	mRNA splicing: U4/U6 x U5 tri-snRNP complex subunit (predicted)	0.160551	0.302933
SPAC18G6.14c	rps7	40S ribosomal protein S7	0.159673	0.130952
SPCC550.10	meu8	betaine aldehyde dehydrogenase	0.159409	0.262387
SPBC1604.01	0	sulfatase modifying factor 1 related	0.159284	0.175028
SPBC691.02c	0	RINT1 family protein: retrograde vesicle-mediated transport, Golgi to ER	0.158986	0.0870132
SPBC19C7.07c	sen34	tRNA-splicing endonuclease subunit Sen34	0.158584	0.152486
SPBC18E5.02c	0	serine palmitoyltransferase complex subunit	0.158428	0.150997
SPBP8B7.31	0	acid phosphatase	0.158264	0.19604
SPCC825.04c	0	N-acetyltransferase	0.158159	0.175131
SPAC343.05	vma1	V-type ATPase	0.158115	0.049985
SPBC14F5.02	0	sequence orphan	0.15767	0.243491
SPAC30C2.06c	dml1	mitochondrial genome maintenance protein	0.157533	0.0676935
SPAC823.11	0	sphingosine-1-phosphate phosphatase	0.157168	0.175496
SPAC521.02	0	metallopeptidase	0.157078	0.180254
SPAC30D11.01c	0	alpha-glucosidase	0.156948	0.159636
SPBC409.09c	mis13	kinetochore protein Mis13	0.156729	0.111226
SPAC1805.08	dlc1	microtubule movement: dynein light chain Dlc1	0.155978	0.14176
SPAC9G1.13c	0	Myb family	0.155899	0.138933
SPCC10H11.02	cwf23	mRNA splicing: DNAJ domain protein	0.155693	0.0329697
SPBC3B9.01	0	Hsp70 nucleotide exchange factor	0.155586	0.425544
SPAC18B11.02c	0	pseudouridylate synthase	0.155476	0.110216
SPAC1782.06c	0	prohibitin	0.15535	0.297789
SPCC622.04	0	dubious ORF	0.15514	0.222419
SPBC27.08c	sua1	sulfate adenylyltransferase	0.155117	0.14557
SPBC16G5.11c	bag101	BAG-family	0.154085	0.134433
SPBP16F5.04	ubc3	ubiquitin conjugating enzyme	0.154065	0.023183
SPBC115.02c	0	ATPase	0.153997	0.173959
SPAC227.06	0	Rab GTPase binding	0.153941	0.1369
SPBC31F10.09c	nut2	mediator complex subunit	0.153925	0.178899
SPBC8D2.06	0	isoleucine-tRNA ligase	0.153125	0.145168
SPCC794.07	0	dihydrolipoamide S-acetyltransferase	0.152726	0.184278
SPBC8D2.18c	0	adenosylhomocysteinase	0.152382	0.120452
SPBC25H2.14	mug16	UNC-50 family protein: ER to golgi transport	0.152228	0.0470734
SPCC31H12.03c	0	transcriptional regulator	0.151381	0.0345222
SPAC3G6.05	0	Mvp17/PMP22 family	0.151164	0.237684
SPBC660.17c	0	sequence orphan	0.151109	0.0711608
SPBC3E7.14	smf1	mRNA splicing: Sm snRNP core protein	0.151033	0.239907
SPAC589.04	0	metaxin 1	0.150385	0.0538582
SPBC2G5.05	0	vitamin metabolism: transketolase	0.149617	0.386592
SPBC428.04	0	sequence orphan	0.149233	0.271698
SPBC1683.01	0	inorganic phosphate transporter	0.149153	0.0928464
SPCC1682.14	rpl1902	60S ribosomal protein L19B	0.148735	0.120172
SPAC9G1.12	cpd1	tRNA (m1A) methyltransferase complex catalytic subunit Cpd1	0.148094	0.134706
SPAC23G3.09	taf4	transcription factor TFIID complex subunit Taf4	0.147926	0.0977243
SPAC12B10.13	0	conserved hypothetical: negative regulator of gluconeogenesis	0.147829	0.116337
SPBP4H10.03	oxa102	mitochondrial inner membrane translocase Oxa102	0.1474	0.155322
SPAC637.05c	vma2	V-type ATPase	0.14705	0.0800759
SPAC15E1.05c	0	phospholipid biosynthesis: ethanolamine-phosphate cytidylyltransferase	0.146882	0.243487
SPAC13D6.05	alp11	tubulin specific chaperone	0.14659	0.0732357
SPBC17G9.03c	0	lysine-tRNA ligase	0.146577	0.136964
SPAC56F8.08	mud1	UBA domain protein	0.146049	0.244701
SPAC21E11.07	0	glycine cleavage T-protein	0.145987	0.0493493
SPBC1A4.06c	0	mitochondrial matrix protein import protein	0.145956	0.302191
SPCC4B3.01	0	rhodanese-like domain	0.145036	0.0165484
SPCC11E10.01	0	cystathionine beta-lyase	0.144639	0.233636
SPAC22F8.07c	rtf1	Myb family	0.144635	0.13132
SPAC23D3.14c	aah2	alpha-amylase	0.144528	0.12825
SPBC15C4.01c	oca3	TPR repeat protein	0.143796	0.153113
SPBC30D10.17c	0	glucan synthase regulator	0.143621	0.0882945
SPAP8A3.08	cdc4	myosin II light chain	0.143353	0.363834
SPAC1782.10c	nhp2	rRNA processing: RNA-binding protein Nhp2	0.143315	0.176893
SPCP1E11.11	0	RNA-binding PUMILIO protein: deadenylation-dependent decay	0.143312	0.0965435
SPBC12C2.09c	0	ADIPOR family	0.141854	0.0987486
SPAC10F6.06	vip1	rrm RNA recognition motif	0.141715	0.211699
SPAC11D3.16c	0	oxidative stress response: sequence orphan	0.141688	0.22693
SPBC29A3.04	rpl8	60S ribosomal protein L7a	0.141636	0.121781
SPBC530.13	0	cyclin	0.141409	0.0439069
SPAC9G1.09	sid1	PAK-related kinase Sid1	0.141333	0.134633
SPAC1486.01	0	oxidative stress response: manganese superoxide dismutase	0.141009	0.00218075
SPBC1709.09	0	mitochondrial translation termination factor	0.139996	0.0231425
SPBC1683.13c	0	transcription factor	0.139853	0.0784822
SPAC27E2.06c	0	methionine-tRNA ligase	0.13941	0.121508
SPAC19A8.10	0	zinc finger protein	0.139338	0.19426
SPBC119.16c	0	conserved fungal protein (Golgi/ER)	0.138726	0.121545
SPBC29A3.21	0	sequence orphan (ER)	0.138702	0.136946
SPCC1281.03c	0	conserved hypothetical: DUF1077 family protein	0.138456	0.0960195
SPBC6B1.04	mde4	mei4 dependent protein Mde4	0.137943	0.128989
SPAC8E11.04c	0	lysophospholipase	0.13757	0.243678
SPBC16A3.08c	0	telomere maintenance: nuclear telomere cap complex subunit	0.135871	0.179785
SPAC24C9.13c	mrp10	mitochondrial ribosomal protein subunit Mrp10	0.135674	0.0403767
SPBC119.03	0	S-adenosylmethionine-dependent methyltransferase	0.135398	0.122444
SPBC1709.16c	0	aromatic ring-opening dioxygenase (predicted)	0.135147	0.206598
SPBC12C2.07c	0	spermidine synthase	0.135021	0.307622
SPACUNK4.13c	0	GTP1/OBG family	0.134735	0.384056
SPBC16H5.08c	0	AAA family ATPase	0.134521	0.278
SPBC2G2.11	0	N-myristoyltransferase 1	0.134335	0.126117
SPCC1442.16c	0	quinone oxidoreductase	0.133989	0.0652871
SPAC29E6.09	0	sequence orphan	0.133823	0.131334
SPBC1734.09	0	NST UDP-N-acetylglucosamine transporter	0.13374	0.0617585
SPAC1952.12c	csn71	COP9/signalosome complex subunit 7a	0.133537	0.120902
SPAC1834.04	hht1	centromere silencing: histone H3	0.133481	0.0513341
SPAC1006.03c	0	conserved hypothetical (human CCDC131 homolog)	0.133035	0.164844
SPCC1393.10	ctr4	copper transporter complex subunit Ctr4	0.132949	0.205067
SPCC1442.10c	rpb3	DNA-directed RNA polymerase II subunit 3	0.132804	0.153629
SPCC548.05c	0	zinc finger protein	0.132686	0.144694
SPBC16A3.01	spn3	septin	0.132523	0.02637
SPAC1B3.13	0	rRNA processing: U3 snoRNP-associated protein Nan1	0.132485	0.0355038
SPAC13C5.01c	0	20S proteasome component	0.132428	0.0261221
SPAC20H4.07	rhp57	RecA family ATPase Rhp57	0.132307	0.287041
SPBC1A4.08c	cct3	chaperonin-containing T-complex gamma subunit Cct3	0.132298	0.104071
SPBC2A9.02	0	NAD dependent epimerase/dehydratase family protein	0.132205	0.10257
SPCC645.12c	0	sequence orphan	0.131522	0.0284309
SPBC13G1.14c	0	mRNA splicing/NMD: RNA-binding protein	0.131379	0.203195
SPAC13G7.07	arb2	RNA interference/centromere silencing: argonaute binding protein 2	0.130954	0.488433
SPCC24B10.04	0	sequence orphan (mitochondrion)	0.130882	0.0712989
SPBC1773.13	0	aromatic aminotransferase	0.130262	0.115889
SPBC12D12.03	cct1	chaperonin-containing T-complex alpha subunit Cct1	0.129448	0.216811
SPCC1281.02c	spf30	mRNA splicing: spliceosome associated protein	0.128488	0.0352819
SPBC1703.01c	0	rRNA processing: RNase P and RNase MRP subunit (predicted)	0.12824	0.129602
SPAC1250.07	sfc7	TFIIIC subunit (pol III transcription)	0.127833	0.265275
SPBC3F6.02c	0	ergosterol biosynthesis: 3 beta-hydroxysteroid dehydrogenase/delta 5-->4-isomerase	0.127799	0.0996628
SPAC1F12.04c	0	conserved fungal protein	0.127222	0.0165141
SPAC4G9.15	0	fatty acid biosynthesis: ketoreductase	0.12715	0.431065
SPBC11G11.02c	end3	actin cortical patch: component End3 (predicted)	0.126827	0.0204359
SPAC13G6.01c	rad8	G1/S transition:ubiquitin-protein ligase	0.126781	0.195119
SPBPB2B2.09c	0	2-dehydropantoate 2-reductase	0.126639	0.18187
SPBC409.17c	0	conserved hypothetical: DUF1769 family protein	0.126572	0.0135833
SPAC2C4.14c	ppk11	PAK-related kinase	0.126421	0.220941
SPAC589.05c	0	conserved eukaryotic protein	0.126312	0.032994
SPBC11B10.01	alg2	mannosyltransferase complex subunit Alg2	0.126125	0.132806
SPAC227.02c	0	rRNA processing: rRNA processing protein Rrp15 (predicted)	0.126077	0.187577
SPAC17G6.13	slt1	sequence orphan	0.125521	0.123243
SPCC830.09c	0	rRNA/tRNA processing: RNase P and RNase MRP subunit	0.125334	0.242677
SPBC27B12.07	0	conserved yeast protein	0.1253	0.0365142
SPBC12C2.06	0	ATP-dependent RNA helicase	0.125265	0.0920122
SPCC4B3.05c	hem12	uroporphyrinogen decarboxylase	0.124938	0.33791
SPBC947.07	0	surfeit locus	0.124534	0.0667303
SPAC23C4.15	rpb5	DNA-directed RNA polymerase I, II and III subunit Rpb5	0.124004	0.223925
SPAC1B2.04	cox6	aerobic respiration: cytochrome c oxidase subunit VI	0.123827	0.0833833
SPAC19G12.12	dlp1	decaprenyl diphosphate synthase subunit 2 Dlp1	0.123823	0.169114
SPBC1703.04	mlh1	MutL family	0.123721	0.148796
SPCC4B3.17	cbp3	ubiquinol cytochrome c reductase assembly protein Cbp3	0.12371	0.115235
SPBC1289.13c	0	alpha-1,2-galactosyltransferase	0.123558	0.0914317
SPBC8D2.04	hht2	centromere silencing: histone H3	0.123353	0.19244
SPBP4H10.10	0	rhomboid family protease	0.123341	0.234333
SPAC22G7.01c	0	aminopeptidase	0.123335	0.19008
SPBC1D7.04	mlo3	RNA annealing factor Mlo3	0.123322	0.236777
SPAC21E11.05c	cyp8	cyclophilin	0.123194	0.0489264
SPBC1703.06	pof10	F-box protein	0.122864	0.0243937
SPBC1105.15c	htd2	fatty acid biosynthesis: 3-hydroxyacyl-ACP dehydratase	0.122813	0.173679
SPBC14C8.11c	0	sequence orphan	0.122799	0.480019
SPAC664.06	rpl703	60S ribosomal protein L7	0.121882	0.155646
SPAC17G6.09	sec62	ER protein translocation subcomplex subunit Sec62	0.121171	0.0101169
SPBC16A3.09c	ufd1	Cdc48-Ufd1-Npl4 complex component	0.120993	0.17616
SPBP26C9.02c	car1	arginase	0.120985	0.225667
SPAC22F8.12c	shf1	small histone ubiquitination factor	0.120677	0.125338
SPBC106.15	idi1	isopentenyl-diphosphate delta-isomerase Idi1	0.120606	0.183045
SPCC1393.06c	0	rRNA processing: rRNA processing protein Ipi1 (predicted)	0.120415	0.0371017
SPBC119.15	0	AAA family ATPase,	0.119751	0.113428
SPAC644.07	0	Rieske ISP assembly protein	0.119429	0.35546
SPBC1198.01	0	glutathione-dependent formaldehyde dehydrogenase	0.119195	0.174501
SPBC1778.04	spo6	Spo4-Spo6 kinase complex regulatory subunit Spo6	0.118981	0.552367
SPAC4F8.07c	hxk2	glycolysis: hexokinase 2	0.11885	0.110451
SPCC1322.09	0	conserved fungal protein	0.118759	0.150098
SPBP22H7.06	0	vitamin metabolism: nicotinamide riboside kinase	0.117903	0.0967751
SPAC30C2.04	0	cofactor for methionyl-and glutamyl-tRNA synthetases	0.117848	0.218421
SPCC1223.08c	dfr1	dihydrofolate reductase Dfr1	0.11765	0.138971
SPAC6F6.11c	0	vitamin metabolism: pyridoxal kinase	0.117611	0.0843489
SPCC584.04	sup35	translation release factor eRF3	0.117293	0.302137
SPCC970.02	0	mannan endo-1,6-alpha-mannosidase	0.117223	0.085808
SPBC119.13c	prp31	mRNA splicing: U4/U6 x U5 tri-snRNP complex subunit Prp31	0.117047	0.043313
SPBC25B2.04c	0	mitochondrial ribosome assembly protein	0.116655	0.252663
SPAPB1E7.03	0	DNA-directed RNA polymerase III complex subunit Rpc82	0.115971	0.0855488
SPBC557.03c	pim1	GDP/GTP exchange factor	0.115557	0.0854313
SPCC285.17	spp27	RNA polymerase I transcription factor subunit Spp27	0.114549	0.228146
SPBC14F5.09c	ade8	adenylosuccinate lyase Ade8	0.11423	0.0696136
SPBC28E12.05	esf2	rRNA processing: U3 snoRNP-associated protein Esf2	0.113866	0.213106
SPBC1709.05	sks2	heat shock protein 70 family	0.113857	0.0594883
SPAC6G10.04c	0	20S proteasome component alpha 6 subunit Pre5	0.113258	0.234732
SPBC365.09c	0	DNA replication: zinc finger protein	0.113078	0.150154
SPAC19A8.13	usp101	mRNA splicing: U1 snRNP-associated protein	0.112806	0.107497
SPBC119.12	0	Golgi matrix protein	0.112699	0.1904
SPBC26H8.14c	cox17	metallochaperone	0.112647	1.06813
SPAC144.02	0	transcription factor	0.112452	0.25002
SPBC2D10.12	rhp23	UBA domain protein	0.112317	0.195661
SPBC1D7.05	byr2	conjugation: MAP kinase kinase kinase Byr2	0.112226	0.11486
SPAC4G9.09c	arg11	amino acid/arginine biosynthesis: N-acetyl-gamma-glutamyl-phosphate reductase/acetylglutamate kinase	0.111351	0.224701
SPAC22H10.04	0	protein phosphatase type 2A	0.111344	0.310723
SPBC839.05c	rps1701	40S ribosomal protein S17	0.111039	0.0405253
SPCC757.08	0	rRNA processing: exosome subunit Rrp45 (predicted)	0.110643	0.118375
SPCC285.04	0	transthyretin	0.110589	0.372985
SPAC3A12.09c	0	urease accessory protein	0.110346	0.10424
SPAC21E11.06	tif224	translation initiation factor eIF2B delta subunit	0.109486	0.045802
SPBC17A3.08	0	TatD homolog (predicted): 3'-5'-exodeoxyribonuclease activity	0.109399	0.0948392
SPBC16G5.07c	0	prohibitin	0.109058	0.117817
SPAC16A10.04	rho4	Rho family GTPase Rho4	0.109038	0.331547
SPBC1703.09	0	sequence orphan (mitochondrion)	0.108629	0.171209
SPAC1D4.02c	0	mitotic spindle checkpoint: human GRASP protein homolog (predicted)	0.108546	0.191929
SPAC3G9.01	nsk1	sequence orphan: Clp1-interacting protein	0.108355	0.045145
SPBC2F12.10	0	mitochondrial ribosomal protein subunit L35	0.10822	0.0737864
SPBC839.03c	0	neddylation protein Dcn1	0.108081	0.0636184
SPBP8B7.20c	0	rRNA processing: RNA methyltransferase Nop2	0.107778	0.188997
SPBP35G2.05c	cki2	serine/threonine protein kinase Cki2	0.107707	0.324712
SPAC12G12.10	0	WD repeat protein	0.107658	0.242172
SPCC132.02	hst2	centromere silencing: Sir2p family histone deacetylase	0.107625	0.185091
SPBC16C6.04	0	sequence orphan	0.107501	0.200654
SPAC16E8.07c	vph1	V-type ATPase	0.107329	0.0965784
SPBC685.04c	aps2	AP-2 adaptor complex subunit Aps2	0.107246	0.165504
SPBC577.09	0	WD repeat protein	0.107103	0.118247
SPBC4F6.11c	0	asparagine synthase	0.106888	0.195065
SPBC13E7.11	0	rhomboid family protease	0.106486	0.279825
SPBC16C6.12c	0	cell polarity: Las1-like protein	0.106379	0.145985
SPBP22H7.03	0	sequence orphan	0.105806	0.0816798
SPBC646.11	cct6	chaperonin-containing T-complex zeta subunit Cct6	0.105267	0.216949
SPBC23G7.10c	0	NADH-dependent flavin oxidoreductase	0.104961	0.145039
SPCC31H12.08c	ccr4	CCR4-Not complex subunit Ccr4	0.104444	0.132397
SPAC6G9.15c	0	sequence orphan	0.103636	0.121688
SPCC550.01c	0	conserved hypothetical: CHCH domain protein (predicted)	0.103228	0.307703
SPCC1620.08	0	aerobic respiration: succinate-CoA ligase	0.102203	0.372413
SPBC18E5.15	0	pseudogene	0.102196	0.357682
SPAC2G11.04	0	G-patch domain	0.102065	0.0422066
SPAC12B10.16c	0	conserved hypothetical: DUF339 family protein	0.101138	0.195754
SPBC215.11c	0	aldo/keto reductase	0.101031	0.112165
SPBC1604.08c	imp1	importin alpha	0.100404	0.131648
SPBC839.15c	ef1a-c	translation elongation factor EF-1 alpha	0.100185	0.0967093
SPBPB2B2.13	gal1	galactokinase	0.0994908	0.116601
SPBC3B9.18c	vma7	V-type ATPase	0.0993078	0.0790511
SPCC4B3.07	0	coiled-coil	0.0990495	0.154203
SPAC12G12.12	0	NST UDP-galactose transporter	0.0990326	0.0282795
SPAC4F10.06	0	BUD22 family protein (predicted): ribosome biogenesis	0.0989224	0.198794
SPBC119.10	0	asparagine synthetase	0.0987522	0.306346
SPAC323.03c	0	sequence orphan: SPB/septum localization	0.0981858	0.124922
SPAC631.01c	acp2	actin cortical patch: F-actin capping protein beta subunit	0.0976528	0.110474
SPAC823.08c	0	rRNA processing: ATP-dependent RNA helicase Rrp3 (predicted)	0.0974636	0.0239838
SPCC24B10.16c	0	sequence orphan	0.0974049	0.0291367
SPBC577.07	ubp10	mRNA splicing: ubiquitin C-terminal hydrolase activity	0.0970911	0.0767248
SPAC2E1P3.04	0	copper amine oxidase	0.0966642	0.0627505
SPAC824.03c	0	conserved fungal protein	0.0961251	0.0872674
SPBC3E7.05c	0	conserved hypothetical: human mitofilin (IMMT) ortholog	0.095922	0.101235
SPCC830.11c	0	rRNA processing: nucleoside-triphosphatase (predicted)	0.095471	0.0270062
SPAC4G8.09	0	leucine-tRNA ligase	0.09529	0.0565818
SPAC10F6.11c	0	kinase activator	0.0951354	0.314235
SPBC725.01	0	aspartate aminotransferase	0.0951288	0.0473631
SPBC13A2.01c	0	mRNA splicing: nuclear cap-binding complex small subunit	0.0950152	0.0408372
SPBC16D10.02	trm11	tRNA (guanine-N2-)-methyltransferase catalytic subunit Trm11	0.0944776	0.169144
SPAC1B3.05	not3	CCR4-Not complex subunit	0.0944694	0.0939316
SPBC1289.12	usp109	mRNA splicing: U1 snRNP-associated protein	0.0941071	0.253288
SPAC23C11.03	0	rRNA processing: U3 snoRNP-associated protein Mpp1 (predicted)	0.0940787	0.0775289
SPAC2F3.02	0	ER protein translocation subcomplex subunit	0.0933531	0.115264
SPBC11C11.09c	rpl502	60S ribosomal protein L5	0.0932928	0.421662
SPAC3F10.04	gsa1	glutathione synthetase large subunit Gsa1	0.0930698	0.169994
SPAC4A8.14	prs1	ribose-phosphate pyrophosphokinase	0.0925597	0.291229
SPBC337.11	0	mitochondrial peptidase	0.0920106	0.177181
SPAC25B8.15c	0	wybutosine biosynthesis protein Tyw3 (predicted): tRNA methylation	0.0917166	0.198541
SPAC110.03	cdc42	cell polarity: Rho family GTPase Cdc42	0.0913761	0.0790531
SPBC16G5.18	erg24	ergosterol biosynthesis: C-14 sterol reductase Erg24	0.0913113	0.434181
SPBC13G1.02	0	mannose-1-phosphate guanyltransferase	0.090797	0.200276
SPBC16A3.11	eso1	DNA replication: sister chromatid cohesion protein	0.0907835	0.154427
SPCC1235.15	dga1	diacylglycerol O-acyltransferase	0.090704	0.242368
SPAC18B11.05	gpi18	phospholipid biosynthesis: pig-V	0.0905952	0.0450568
SPCC965.03	vma8	V-type ATPase	0.0904084	0.333349
SPBC2F12.02c	mrpl7	mitochondrial ribosomal protein subunit L7	0.0903047	0.127249
SPBC106.06	cct4	chaperonin-containing T-complex delta subunit Cct4	0.0902911	0.143166
SPBC577.08c	txl1	oxidative stress response/redox homeostasis: thioredoxin family	0.090125	0.210937
SPAC29A4.20	0	histone acetyltransferase subunit of the elongator complex	0.0901066	0.0558626
SPCC757.10	vph2	endoplasmic reticulum membrane involved in assembly of the V-ATPase	0.0900794	0.294339
SPAC22A12.03c	csn4	COP9/signalosome complex subunit Csn4	0.0898984	0.123934
SPCC338.08	ctp1	CtIP-related endonuclease: DSB processing	0.0897153	2.95562
SPAC6F6.16c	tpz1	telomere maintenance: Tppl homolog Tpz1: telomere capping	0.0897069	0.311063
SPBC409.11	meu18	NLS	0.0893233	0.0789889
SPAC959.03c	0	rRNA processing: U3 snoRNP-associated protein Utp7	0.0893218	0.166771
SPCC1322.07c	0	sequence orphan	0.0886286	0.0843998
SPBC21B10.11	dpm2	phospholipid biosynthesis: dolichol-phosphate mannosyltransferase subunit 2	0.0878865	0.202015
SPBC337.12	0	zinc finger protein	0.0878136	0.0759957
SPAC1296.04	mug65	spore wall assembly protein (predicted)	0.0876831	0.0735409
SPCC663.09c	0	short chain dehydrogenase	0.0870112	0.171712
SPAC688.13	scn1	TatD DNase family	0.0869308	0.172737
SPBC16E9.05	erg6	ergosterol biosynthesis: delta-sterol C-methyltransferase	0.0867563	0.130888
SPAC57A7.13	0	mRNA splicing: RNA-binding protein	0.086462	0.05988
SPBC36B7.02	0	conserved hypothetical: Svf1 family protein Svf2	0.0862229	0.056854
SPAC139.04c	fap2	L-saccharopine oxidase	0.08589	0.23224
SPBC19G7.15	nup44	nucleoporin	0.0857724	0.0356243
SPAC6B12.12	tom70	mitochondrial TOM complex subunit Tom70	0.0857459	0.169287
SPBC106.07c	0	peptide alpha-N-acetyltransferase	0.0853053	0.114591
SPBC216.04c	0	oxidative stress response: methionine sulfoxide	0.0852651	0.196621
SPBC23E6.03c	nta1	protein N-terminal amidase Nta1	0.0852549	0.0760427
SPAC16E8.12c	0	sequence orphan	0.0847025	0.0895627
SPBC1711.12	0	dipeptidyl peptidase	0.0839882	0.145683
SPCC1906.01	mpg1	mannose-1-phosphate guanyltransferase Mpg1	0.0837305	0.193476
SPBC32H8.10	cdk9	cyclin-dependent protein kinase Cdk9	0.0832915	0.254313
SPBC215.15	sec13	COPII-coated vesicle component	0.0832212	0.00954061
SPAC13G6.07c	rps601	40S ribosomal protein S6	0.0827595	0.375702
SPAC1687.10	mcp1	meiosis specific coiled-coil protein Mcp1	0.0825173	0.119058
SPBC56F2.01	pof12	F-box protein	0.0822678	0.0430413
SPBC800.08	gcd10	translation initiation factor eIF-3 gamma subunit Gcd10	0.0819436	0.175403
SPCC16C4.03	pin1	peptidyl-prolyl cis-trans isomerase Pin1	0.081814	0.639805
SPAC18G6.04c	shm2	serine hydroxymethyltransferase	0.0817603	0.00903281
SPAC12B10.07	acp1	actin cortical patch: F-actin capping protein alpha subunit	0.0813013	0.0325037
SPBC215.09c	erg10	ergosterol biosynthesis: acetyl-CoA C-acetyltransferase Erg10	0.0811922	0.0445243
SPAC18G6.13	0	sequence orphan	0.0805415	0.493608
SPBC543.08	0	phospholipid biosynthesis: phosphoinositide biosynthesis protein	0.0801411	0.108858
SPBC29A10.03c	rlf2	chromatin remodeling complex subunit Rlf2	0.0798313	0.0782675
SPAC1952.08c	0	vitamin metabolism: pyridoxamine 5'-phosphate oxidase	0.0798065	0.18295
SPAC26H5.02c	0	DNA replication: AAA family ATPase	0.0797658	0.00390573
SPBC16G5.06	0	sequence orphan (ER)	0.0795207	0.136037
SPBC19C2.06c	0	sequence orphan	0.0793897	0.138172
SPBC405.01	ade1	phosphoribosylamine-glycine ligase	0.0792855	0.145914
SPAC10F6.17c	0	protein phosphatase type 2C	0.078976	0.00513664
SPBC3D6.06c	0	ribose-phosphate pyrophosphokinase	0.0787593	0.0820741
SPAC105.01c	0	potassium ion/proton antiporter	0.0785411	0.0150519
SPBC609.02	ptn1	phosphatidylinositol-3,4,5-trisphosphate 3-phosphatase	0.0782167	0.67921
SPAC16C9.03	0	export adaptor	0.0779541	0.0945408
SPAC343.09	ubx3	UBX domain	0.0776229	0.194965
SPBC16E9.03c	0	conserved hypothetical: DUF1783 family protein	0.0776018	0.104971
SPCPB16A4.05c	0	urease accessory protein UREG	0.0773799	0.314614
SPAC1687.01	rpc19	DNA-directed RNA polymerase I and III subunit Rpc19	0.0773532	0.222529
SPCC553.02	0	vitamin metabolism: glutamine-dependent NAD	0.0771454	0.119502
SPCC777.13	vps35	vacuolar protein sorting-associated protein 35	0.0771098	0.133952
SPCC4G3.02	aph1	bis	0.0765271	0.0866164
SPAC31G5.03	rps1101	40S ribosomal protein S11	0.0764548	0.105784
SPAC1687.14c	0	EF hand	0.0762806	0.220446
SPAC3H1.04c	mdm31	mitochondrial inner membrane protein Mdm31	0.0761636	0.0342204
SPAC637.06	0	alpha-1,2-galactosyltransferase	0.0760464	0.299214
SPBC16D10.01c	0	TPR repeat protein	0.0754793	0.253585
SPBC19C2.13c	ctu2	cytosolic thiouridylase subunit Ctu2: tRNA modification	0.0749866	0.0953442
SPBP8B7.02	0	sequence orphan (septum localization)	0.0741942	0.331144
SPAC6B12.04c	0	aminotransferase	0.0730593	0.0400316
SPAC25H1.05	meu29	meiotic expression upregulated	0.0727266	0.130347
SPACUNK4.09	0	conserved protein	0.0726923	0.192266
SPAC12G12.07c	0	conserved fungal protein	0.0724714	0.300587
SPAC19G12.02c	pms1	MutL family	0.0723747	0.0635955
SPBC9B6.08	clc1	clathrin light chain	0.0716732	0.078563
SPCC1753.04	tol1	3'(2'),5'-bisphosphate nucleotidase/inositol-1,4-bisphosphate 1-phosphatase	0.0715902	0.0701454
SPBC4B4.10c	mug77	autophagy associated protein Atg5	0.0714023	0.15819
SPAC637.07	moe1	translation initiation factor eIF3d Moe1	0.0712922	0.10652
SPCC1620.09c	tfg1	transcription factor TFIIF complex alpha subunit Tfg1	0.071236	0.291918
SPBC27B12.05	0	WD repeat protein	0.0711985	0.208633
SPBP4H10.17c	0	mitochondrial ribosomal small subunit	0.0709762	0.13128
SPBC1105.04c	cbp1	DNA replication: centromere silencing/DNA replication initiation: CENP-B homolog	0.0706705	0.173563
SPAC24H6.08	0	sequence orphan	0.0703593	0.155035
SPCC16A11.10c	oca8	cytochrome b5	0.0691298	0.223464
SPAC16C9.01c	0	conserved hypothetical: carbohydrate kinase (predicted)	0.0683833	0.160165
SPBC14C8.16c	bot1	aerobic respiration: mitochondrial ribosomal protein subunit	0.0683009	0.367244
SPBC1289.09	tim21	mitochondrial inner membrane presequence translocase complex subunit	0.0680607	0.190341
SPAC637.09	0	ribonuclease H70	0.0673708	0.147102
SPCC1739.07	0	rRNA processing: substrate-specific nuclear cofactor for exosome activity	0.0673523	0.119775
SPBC21C3.15c	0	aldehyde dehydrogenase	0.0666863	0.144852
SPBC18H10.17c	0	mitochondrial ribosomal protein subunit Mrp49	0.0666144	0.124659
SPAC8F11.03	msh3	MutS protein homolog 3	0.0665519	0.0750672
SPAC13D6.02c	byr3	zinc finger protein	0.0664303	0.0704671
SPAC1142.06	0	ATPase	0.0658372	0.118851
SPBC1685.16	0	vacuolar H+ ATPase subunit e	0.0656408	0.0813246
SPAC26A3.06	0	methyltransferase	0.0655313	0.0884166
SPAC630.11	vps55	late endosome to vacuole transport: vacuolar sorting protein	0.0654261	0.137392
SPCC16A11.03c	0	conserved hypothetical: DUF2009 protein	0.065307	0.183283
SPBC1861.07	0	elongin C	0.0649717	0.335332
SPCC622.19	jmj4	jmjC domain	0.0647448	0.139691
SPCC1919.09	tif6	translation initiation factor eIF6	0.0640992	0.0653455
SPAC22A12.14c	0	BSD domain	0.0628287	0.0831528
SPCC550.04c	gpi2	phospholipid biosynthesis: pig-C	0.0622672	0.05073
SPBP19A11.06	lid2	Lid2 complex subunit Lid2	0.0621327	0.0543096
SPAC4D7.08c	ade4	amidophosphoribosyltransferase	0.0614689	0.126893
SPCC18.17c	0	sequence orphan	0.0613244	0.224787
SPBC2G2.01c	liz1	fatty acid biosynthesis: pantothenate transporter	0.0613018	0.140983
SPAC17H9.05	ebp2	rRNA processing: P40-like	0.0612799	0.124822
SPAC6F12.08c	0	exocyst complex subunit	0.06125	0.0998343
SPCC126.06	twf1	actin cortical patch: twinfilin	0.0610082	0.11785
SPAC1687.03c	rfc4	DNA replication: DNA replication factor C complex subunit Rfc4	0.0607355	0.12548
SPAC56E4.05	mug69	conserved hypothetical: DUF788 family protein	0.0607285	0.0467252
SPCC794.12c	mae2	aerobic respiration: malic enzyme	0.0605194	0.310192
SPAC9G1.07	0	sequence orphan	0.060075	0.171117
SPAC31A2.09c	apm4	AP-2 adaptor complex subunit Apm4	0.0599738	0.0147605
SPBC354.15	fap1	L-pipecolate oxidase	0.0599187	0.08455
SPAC10F6.04	0	regulator of condensation	0.0598655	0.0503259
SPBC83.15	0	WD repeat protein	0.0594793	0.265403
SPCC18.14c	rpp0	60S acidic ribosomal protein	0.0594257	0.0468795
SPAC3C7.11c	cnx1	calnexin	0.0592251	0.453145
SPBC16G5.12c	top3	DNA replication: DNA topoisomerase III	0.0590128	0.0120335
SPBC83.08	0	AAA family ATPase	0.0587063	0.206874
SPBC3B9.02c	cwf28	mRNA splicing: G-patch domain	0.0585604	0.150954
SPCC1235.04c	0	vitamin metabolism: FAD synthetase	0.0581942	0.0985657
SPCC18.12c	0	rRNA processing: DUF652	0.0578944	0.0488458
SPAC23C4.12	hhp2	serine/threonine protein kinase Hhp2	0.0578719	0.215858
SPAC57A7.07c	0	homocysteine methyltransferase	0.0577659	0.0613609
SPAC3H8.03	0	mitochondrial ribosomal protein subunit	0.0568551	0.19858
SPAC18G6.15	mal3	microtubule movement: EB1 family plus end tracking protein Mal3	0.0559875	0.258307
SPAC513.01c	eft201	translation elongation factor 2	0.0559793	0.244215
SPAC23A1.05	0	sequence orphan	0.055815	0.0777932
SPBC25H2.07	tif11	translation initiation factor eIF1A	0.0551771	0.361398
SPAC3C7.05c	0	glycosyl hydrolase family 76	0.0547876	0.289688
SPBC4.06	0	acid phosphatase	0.0547177	0.0788554
SPAC644.08	0	haloacid dehalogenase-like hydrolase	0.0547111	0.0906307
SPCC338.18	0	sequence orphan (golgi/ER)	0.0544726	0.372346
SPCC1259.12c	0	SPRY domain	0.054123	0.189881
SPBC31E1.04	pep12	SNARE	0.0540289	0.147861
SPAC12G12.06c	0	rRNA processing: RNA 3'-terminal phosphate cyclase	0.0538998	0.093752
SPCP25A2.03	0	vertebrate p84	0.0536021	0.275697
SPCC338.07c	0	N-acetyltransferase complex subunit	0.0535652	0.0553776
SPBC146.07	prp2	mRNA splicing: U2AF large subunit	0.0530748	0.0612908
SPAC16E8.03	gna1	glucosamine-phosphate N-acetyltransferase	0.0529999	0.219524
SPAC2C4.06c	0	rRNA processing: rRNA methyltransferase (predicted)	0.0526532	0.0598278
SPAC26H5.06	pot1	telomere maintenance: telomere end-binding protein	0.0525583	0.00233424
SPAC1039.05c	klf1	zinc finger protein Klf1	0.0520705	0.0945038
SPBC211.01	rsm10	mitochondrial ribosomal protein subunit S10	0.0516425	0.0952823
SPBC1773.02c	0	oxidative stress response/redox homeostasis: thioredoxin peroxidase	0.0510845	0.00726627
SPBPB2B2.02	mug180	esterase/lipase (predicted)	0.0506463	0.211559
SPAC17A5.02c	dbr1	mRNA splicing: RNA lariat debranching enzyme	0.0498941	0.165502
SPBC839.16	0	folic acid biosynthesis: C-1-tetrahydrofolate synthase	0.0498016	0.175974
SPBC32F12.07c	0	zinc finger protein	0.0493927	0.148651
SPBC887.01	0	acireductone dioxygenase family	0.0489403	0.0230378
SPBC13E7.08c	0	RNA polymerase II associated Paf1 complex	0.0487577	0.420993
SPAC19G12.09	0	NADPH-dependent alpha-keto amide reductase	0.0487426	0.285789
SPCC1795.07	0	mitochondrial ribosomal protein subunit S13	0.048741	0.118595
SPBC14F5.06	0	iron-sulfur protein	0.0486777	0.182637
SPAP27G11.03	0	D123 family	0.0486057	0.109416
SPBC887.18c	0	transcription adaptor protein	0.0483559	0.00956687
SPBC1105.02c	lys4	homocitrate synthase	0.0479449	0.0618248
SPAC13C5.04	0	glutamine amidotransferase	0.0476574	0.121024
SPAC4A8.10	0	lipase	0.0476075	0.225883
SPAC607.04	0	inositol polyphosphate kinase	0.0474353	0.133506
SPBC28E12.04	0	sequence orphan	0.0472861	0.0661901
SPAC19G12.04	0	ureidoglycolate hydrolase	0.0470332	0.779996
SPBC244.01c	sid4	SIN component scaffold protein	0.0465565	0.0683201
SPCC4G3.15c	not2	CCR4-Not complex subunit	0.0463382	0.0542715
SPBC18H10.03	tif35	translation initiation factor eIF3g	0.0462723	0.135594
SPBC646.09c	int6	translation initiation factor eIF3e	0.0453399	0.186431
SPCC1235.10c	sec6	exocyst complex subunit Sec6	0.0449852	0.0726557
SPAC2G11.05c	0	BRO1 domain protein	0.0449081	0.168457
SPCC330.09	0	rRNA processing: rRNA processing protein Enp2 (predicted)	0.0445877	0.203836
SPBC1711.05	0	chaperone	0.0444697	0.363987
SPBC1711.07	0	WD repeat protein	0.0437644	0.255174
SPAC10F6.10	0	protein kinase	0.0434875	0.134033
SPBC776.05	0	membrane transporter	0.0430801	0.094058
SPBC3E7.02c	hsp16	heat shock protein	0.0430631	0.387864
SPCC320.06	0	conserved fungal protein	0.0427737	0.0511052
SPBC651.07	csa1	COP9/signalosome associated	0.0420487	0.0183918
SPAC11G7.05c	0	aerobic respiration: [acyl-carrier protein] S-malonyltransferase	0.0416147	0.396814
SPCC736.13	0	short chain dehydrogenase	0.0414767	0.0598394
SPAC823.13c	0	mitochondrial inner membrane protein	0.0412089	0.0811654
SPAC31A2.06	atp25	mitochondrial ATP synthase complex assembly protein Atp25 (predicted)	0.0410378	0.0635935
SPBC29A10.13	atp7	F0-ATPase subunit D	0.0407486	0.258227
SPAC17C9.10	stm1	G-protein coupled receptor Stm1	0.0406067	0.200032
SPBC1685.11	rlp1	DNA replication: RecA family ATPase Rlp1	0.0399394	0.138652
SPBC651.11c	apm3	AP-3 adaptor complex subunit Apm3	0.0396228	0.311488
SPBC25H2.15	0	programmed cell death protein homolog (predicted)	0.0395799	0.0534401
SPBC1703.15c	vps33	late endosome to vacuole transport: sec1 family	0.0382684	0.262552
SPBC3H7.12	0	sequence orphan	0.0380195	0.0460448
SPBC902.04	0	rrm RNA recognition motif	0.0379744	0.325471
SPAC19A8.14	0	aminoacyl-tRNA hydrolase	0.0371684	0.00303282
SPBC21C3.01c	vps13a	late endosome to vacuole transport: chorein homolog	0.0369891	0.0554762
SPBC3H7.07c	0	phosphoserine phosphatase	0.0367938	0.219891
SPCC1919.04	0	sequence orphan	0.0366678	0.167034
SPCC1259.03	rpa12	DNA-directed RNA polymerase complex I subunit Rpa12	0.0364866	0.400585
SPAC22A12.11	dak1	dihydroxyacetone kinase Dak1	0.0361548	0.272316
SPAC10F6.02c	prp22	mRNA splicing: ATP-dependent RNA helicase Prp22	0.0361492	0.0995082
SPAC11D3.10	0	nifs homolog	0.0359939	0.287023
SPAP19A11.05c	mrp7	mitochondrial ribosomal protein subunit L27	0.0359614	0.198892
SPBC428.20c	alp6	mitotic spindle checkpoint: gamma tubulin complex subunit Alp6	0.0356519	0.43901
SPBC16D10.03	pgp2	telomere maintenance: O-sialoglycoprotein endopeptidase	0.0350652	0.259657
SPAPYUG7.05	0	delta-1-pyrroline-5-carboxylate reductase	0.0347325	0.462475
SPAC4A8.03c	ptc4	protein phosphatase 2C Ptc4	0.0345875	0.380189
SPBC32H8.04c	0	rRNA processing: rRNA processing protein Fcf1 (predicted)	0.0334943	0.0514919
SPAPB1E7.11c	0	sequence orphan (possible mitochondrion protein)	0.0329454	0.167878
SPCC24B10.17	0	emp24 family	0.0327492	0.0901074
SPBC3H7.13	0	FHA domain	0.0326968	0.301246
SPAC2G11.10c	0	oxidative stress response: URM1 activating enzyme (predicted) rhodanese-like domain	0.0326706	0.124076
SPBC3F6.03	trr1	oxidative stress response: thioredoxin reductase	0.0325861	0.218852
SPBC646.10c	0	rRNA processing: U3 snoRNP protein Nop56 (predicted)	0.0325122	0.154641
SPAC31G5.17c	rps1001	40S ribosomal protein S10	0.032246	0.429837
SPBP8B7.27	0	ubiquitin-protein ligase	0.0320498	0.306107
SPAC4H3.14c	0	sequence orphan	0.0313308	0.289763
SPAC26A3.05	chc1	clathrin heavy chain Chc1	0.0306736	0.134334
SPAC3G6.03c	0	conserved hypothetical: Maf-like protein	0.0303388	0.191134
SPAPB24D3.07c	0	sequence orphan: ER	0.030317	0.339309
SPBC839.17c	fkh1	peptidyl-prolyl cis-trans isomerase	0.0301662	0.00148983
SPAC4G8.07c	0	tRNA (m5U54) methyltransferase Trm2 (predicted)	0.0299634	0.20156
SPBC609.05	pob3	centromere silencing: FACT complex component	0.0298204	0.0744214
SPAC23C11.09	0	alanine-tRNA ligase	0.029614	0.0913585
SPCC126.01c	0	WD repeat protein	0.02948	0.0469994
SPAC12G12.13c	cid14	rRNA processing: DNA polymerase sigma	0.0288968	0.166305
SPAC323.04	0	AAA family ATPase	0.0286623	0.0350132
SPBC21D10.11c	nfs1	iron-sulfur cluster assembly protein Nfs1	0.0281042	0.281763
SPBC36.08c	cog2	Golgi transport complex subunit Cog2 (predicted)	0.0279969	0.0226903
SPBC1815.01	eno101	glycolysis: enolase	0.0279948	0.295273
SPAP27G11.06c	0	AP-1 adaptor complex	0.0278759	0.123038
SPAC1A6.10	0	Moeb/ThiF domain	0.0278106	0.0703997
SPBC1703.05	0	rRNA processing: protein kinase, RIO family	0.0277476	0.00598176
SPBC16C6.07c	rpt1	19S proteasome regulatory subunit	0.027336	0.249523
SPBC3B9.03	0	signal recognition particle receptor alpha subunit Srp101	0.0272569	0.354032
SPAC105.02c	0	ankyrin repeat protein	0.0264937	0.0129604
SPBC336.11	0	GARP complex	0.0258563	0.117943
SPBC24C6.02	0	rRNA processing: ATP-dependent RNA helicase Spb4 (predicted)	0.0257509	0.237356
SPAC22F8.10c	sap145	mRNA splicing: U2 snRNP-associated protein	0.0256207	0.289251
SPBC2G2.14	0	sequence orphan	0.0256141	0.134466
SPBC4F6.16c	ero11	ER oxidoreductin Ero1a	0.0255996	0.0489175
SPAC806.05	0	conserved hypothetical: DUF1763 family protein	0.0255475	0.131882
SPAC1093.04c	0	tRNA nucleotidyltransferase	0.0254115	0.0399264
SPCC1840.11	csl4	rRNA processing: exosome subunit Csl4	0.0252763	0.0604124
SPAC29A4.02c	0	translation elongation factor EF-1 gamma subunit	0.0251375	0.551341
SPAC23H4.10c	thi4	vitamin metabolism: bifunctional enzyme	0.0250505	0.175408
SPBC651.02	0	carbon-nitrogen hydrolase family	0.02488	0.0587958
SPCC338.14	0	adenosine kinase	0.0240684	0.0836052
SPBC30D10.15	0	rRNA processing: snoRNP assembly factor Naf1 (predicted)	0.0234496	0.0842943
SPBC16G5.17	0	transcription factor	0.0234179	0.156221
SPBC14C8.04	0	amino acid/isoleucine synthesis: acetolactate synthase regulatory unit	0.0233584	0.170346
SPAC2E1P5.02c	0	sequence orphan	0.0228817	0.180093
SPAC9.11	0	sequence orphan	0.0228215	0.176813
SPBC25B2.06c	btb2	BTB/POZ domain	0.0224554	0.16984
SPBC106.13	0	cytoskeletal conserved protein; negative regulator of gluconeogenesis	0.0221758	0.0712553
SPBC337.07c	0	carboxypeptidase	0.0220981	0.243943
SPBC32F12.04	tug1	gamma-tubulin	0.0217024	0.217396
SPAC6G10.08	idp1	aerobic respiration: isocitrate dehydrogenase Idp1	0.0215664	0.202905
SPBP23A10.06	0	mitochondrial carrier	0.0215659	0.0120673
SPAC1834.07	klp3	microtubule movement: kinesin-like protein Klp3	0.0215326	0.2302
SPCC1442.13c	0	RNA-binding protein, G-patch type	0.0212166	0.0846077
SPBC4F6.15c	swi10	DNA repair endonuclease	0.0211993	0.266288
SPCC550.06c	hsp10	heat shock protein	0.0203093	0.217097
SPBC13E7.01	cwf22	mRNA splicing: spliceosome associated protein Cwf22	0.0200658	0.143673
SPAC16E8.11c	tfb1	transcription factor TFIIH complex subunit Tfb1	0.0199939	0.199292
SPCC1840.04	0	caspase	0.0198126	0.144965
SPAC644.13c	0	Rab GTPase binding	0.0192747	0.16375
SPBC17D1.01	0	transcriptional regulatory protein Spp41	0.0191304	0.127999
SPAC6G9.06c	pcp1	pericentrin homolog Pcp1	0.0190171	0.0570055
SPAC1F5.10	0	rRNA processing: ATP-dependent RNA helicase, eIF4A related (predicted)	0.0188623	0.221485
SPAC1A6.09c	lag1	sphingosine N-acyltransferase	0.0186784	0.08284
SPBC1921.02	rad60	DNA replication: DNA repair protein Rad60	0.0185602	0.0820789
SPAC20G4.07c	sts1	ergosterol biosynthesis: C-24	0.0184924	0.15762
SPAC1250.03	ubc14	ubiquitin conjugating enzyme	0.0184549	0.104039
SPAPB2B4.07	0	conserved hypothetical: ubiquitin family protein, human UBTD1 homolog	0.018395	0.0701446
SPAC29A4.05	cam2	myosin I light chain Cam2	0.0179913	0.0936156
SPCC737.09c	hmt1	ATP-binding cassette-type vacuolar membrane transporter Hmt1	0.0179179	0.146595
SPAC8C9.15c	tif225	translation initiation factor eIF2B epsilon subunit	0.0171107	0.240242
SPCC126.15c	sec65	signal recognition particle subunit Sec65	0.0169	0.247305
SPCC1840.09	0	NAD dependent epimerase/dehydratase family protein	0.0167966	0.0476853
SPAC20H4.06c	0	RNA-binding protein	0.0166271	0.133635
SPAC22F3.08c	rok1	rRNA processing: DEAD/DEAH box helicase	0.0161731	0.0771584
SPAC222.13c	0	6-phosphofructo-2-kinase	0.0159899	0.0538517
SPBC36B7.08c	0	nucleosome assembly protein	0.0146448	1.09218
SPBC1709.06	0	tRNA dihydrouridine synthase	0.0141655	0.122319
SPAC16E8.17c	0	aerobic respiration: succinate-CoA ligase	0.014097	0.106701
SPBC25H2.02	ths1	threonine-tRNA ligase	0.0137684	0.0838301
SPBC649.04	uvi15	UV-induced protein Uvi15	0.0136883	0.306974
SPCC1322.02	0	sequence orphan	0.0135267	0.166474
SPAC1420.02c	cct5	chaperonin-containing T-complex epsilon subunit Cct5	0.013499	0.0590599
SPAC5H10.10	0	NADPH dehydrogenase	0.0131719	0.0472802
SPCC330.02	rhp7	leucine-rich repeat protein	0.0131567	0.0295901
SPAC1486.03c	0	mRNA splicing: G-patch domain	0.0130408	0.155896
SPCC18.08	0	lysine-tRNA ligase	0.0129441	0.219121
SPBC8D2.16c	0	conserved hypothetical: DUF171 family protein	0.0128865	0.0289423
SPBC23G7.06c	0	conserved eukaryotic protein	0.0127249	0.151594
SPBC29A3.10c	atp14	F1-ATPase subunit H	0.0123113	0.122915
SPBC19G7.16	isw1	transcription elongation factor complex	0.0121814	0.148363
SPBP19A11.02c	0	glycoprotein	0.011666	0.204348
SPAC1687.11	spb1	rRNA processing: rRNA methyltransferase Pmt2	0.0109766	0.238736
SPAC343.15	0	tRNA isopentenyltransferase	0.0103753	0.0908248
SPAC30D11.06c	0	conserved hypothetical: DUF300 family protein	0.0103224	0.177353
SPCC663.10	0	conserved hypothetical: methyltransferase, DUF1613 family (predicted)	0.0101156	0.0634415
SPAC1834.09	mug51	conserved fungal protein	0.00907216	0.368178
SPAC5H10.12c	0	acetylglucosaminyltransferase	0.0089076	0.0142859
SPAC144.17c	0	6-phosphofructo-2-kinase	0.00855202	0.0821407
SPBC646.13	sds23	CBS domain protein	0.00846065	0.0345576
SPCC4B3.03c	0	CBS domain protein	0.00839893	0.111655
SPAC18G6.01c	0	conserved hypothetical: Chalcone-flavanone isomerase	0.00829873	0.247272
SPAC977.16c	dak2	dihydroxyacetone kinase Dak2	0.008276	0.150374
SPBC16D10.07c	sir2	centromere silencing: Sir2p family histone deacetylase	0.00795136	0.0865085
SPBC1A4.11c	0	sequence orphan	0.00788321	0.202279
SPAC11D3.05	0	MFS family membrane transporter	0.0073325	0.232103
SPBP19A11.03c	mts4	19S proteasome regulatory subunit	0.00715277	0.12697
SPCC11E10.04	0	ATPase expression protein homolog	0.00705052	0.144176
SPAPB17E12.08	0	N-glycosylation protein (predicted)	0.00692328	0.259064
SPBC4.05	mlo2	zinc finger protein	0.00643632	0.0291325
SPAC17H9.08	0	mitochondrial coenzyme A transporter	0.00632065	0.276754
SPBC1539.05	0	Golgi transport complex subunit	0.00606004	0.239271
SPAP8A3.07c	0	phospho-2-dehydro-3-deoxyheptonate aldolase	0.00593524	0.0936928
SPAC57A7.06	0	rRNA processing: U3 snoRNP protein Utp14 (predicted)	0.00554011	0.314539
SPBC1685.03	sec11	signal peptidase subunit	0.00523706	0.2755
SPAC24H6.11c	0	sulfate transporter	0.00510649	0.104108
SPBC8D2.12c	0	mitochondrial DNA binding protein (predicted)	0.00490301	0.132696
SPBC16A3.04	rsm25	mitochondrial ribosomal protein subunit Rsm25	0.00489194	0.198619
SPAC18B11.03c	0	N-acetyltransferase	0.00439327	0.011613
SPCC11E10.07c	0	translation initiation factor eIF2B subunit	0.00411822	0.139228
SPAC2F7.04	pmc2	RNA polymerase II holoenzyme mediator complex subunit	0.00409176	0.0846288
SPBC1A4.09	0	rRNA processing: pseudouridine synthase	0.00401958	0.0254759
SPAC29E6.06c	0	cysteine-tRNA ligase	0.0038747	0.0770268
[truncated: 3,057 more rows]
